# Supplementary material
Source: PubMed Central journal article supplement (PMC3712786)
Supplement: NIHMS492337-supplement-1_si_001.pdf [file NIHMS492337-supplement-1_si_001.pdf]

## Supporting Information

### **Novel Nitrogen-Enriched Oridonin Analogs with Thiazole-Fused A-Ring: Protecting Group-Free Synthesis, Enhanced Anticancer Profile, and Improved Aqueous Solubility**

Chunyang Ding,<sup>†,ξ</sup> Yusong Zhang,<sup>‡,§,ξ</sup> Haijun Chen,<sup>†</sup> Zhengduo Yang,<sup>§</sup> Christopher Wild,<sup>†</sup> Lili Chu,<sup>§</sup> Huiling Liu,<sup>†</sup> Qiang Shen,<sup>§,\*</sup> and Jia Zhou<sup>†,\*</sup>

<sup>†</sup>Chemical Biology Program, Department of Pharmacology and Toxicology, University of Texas Medical Branch, Galveston, Texas 77555, United States

<sup>‡</sup>Department of Oncology, the Second Affiliated Hospital of Soochow University, Suzhou, Jiangsu, 215004, China

<sup>§</sup>Department of Clinical Cancer Prevention, Division of Cancer Prevention and Population Sciences, The University of Texas M.D. Anderson Cancer Center, Houston, Texas 77030, United States

## Table of Contents

|                                                                                                              |               |
|--------------------------------------------------------------------------------------------------------------|---------------|
| <b>Figure 1S. Growth inhibitory effects of adriamycin (ADR) on MCF-7 and ADR-resistant MCF-7 cells</b> ..... | <b>S3</b>     |
| <b>Copies of NMR data</b> .....                                                                              | <b>S4-S27</b> |

MCF-7/ADR cells were obtained from Michael Zhu (University of Texas, Houston Health Science Center, Houston, TX, 77030). The resistance was maintained by exposure cells to 10  $\mu\text{M}$  of adriamycin for 48 h every 8 weeks. As shown in **Figure 1S**, adriamycin dose-dependently suppressed the growth of MCF-7 cells at the concentrations from 0.1 to 20  $\mu\text{M}$ ; on the contrary, it displayed no growth inhibitory activity against MCF-7/ADR cells at the same concentrations, These results demonstrated that MCF/ADR cell is adriamycin-resiatant.

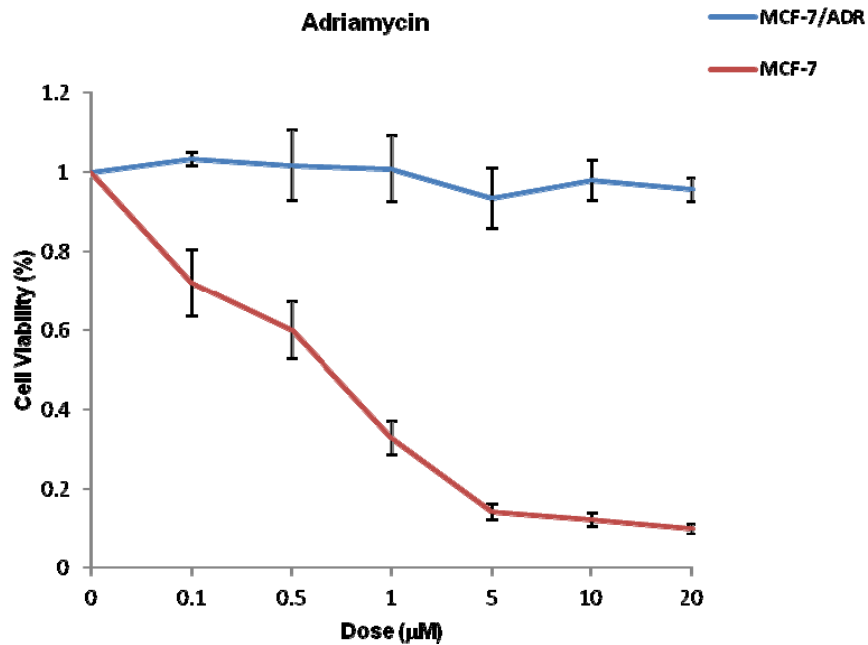

**Figure 1S.** Growth inhibitory effects of adriamycin on MCF-7 and MCF-7/ADR cells. These cells were treated with varying concentrations of adriamycin for 48 h. Values are mean  $\pm$  SE of three independent experiments. Statistical significance was determined using Student's t-test.

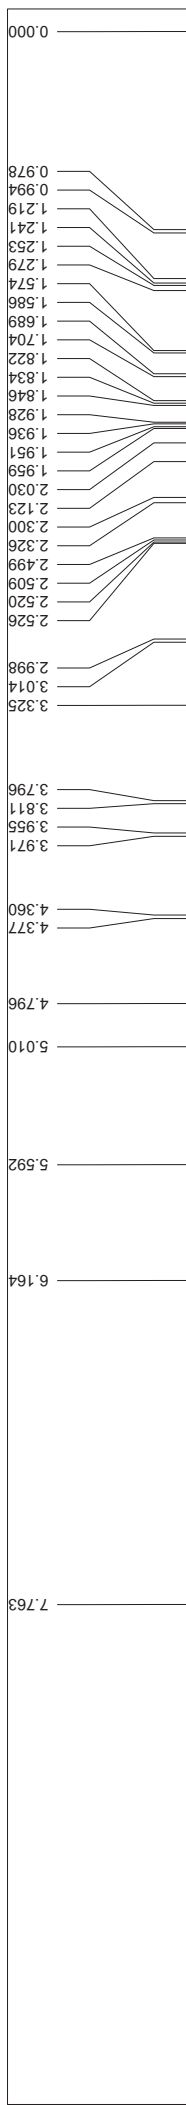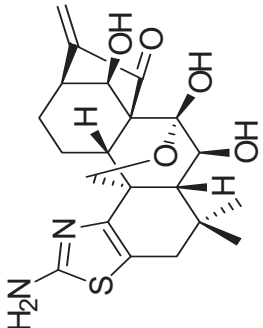

5 (CDCl<sub>3</sub> + CD<sub>3</sub>OD)

S4

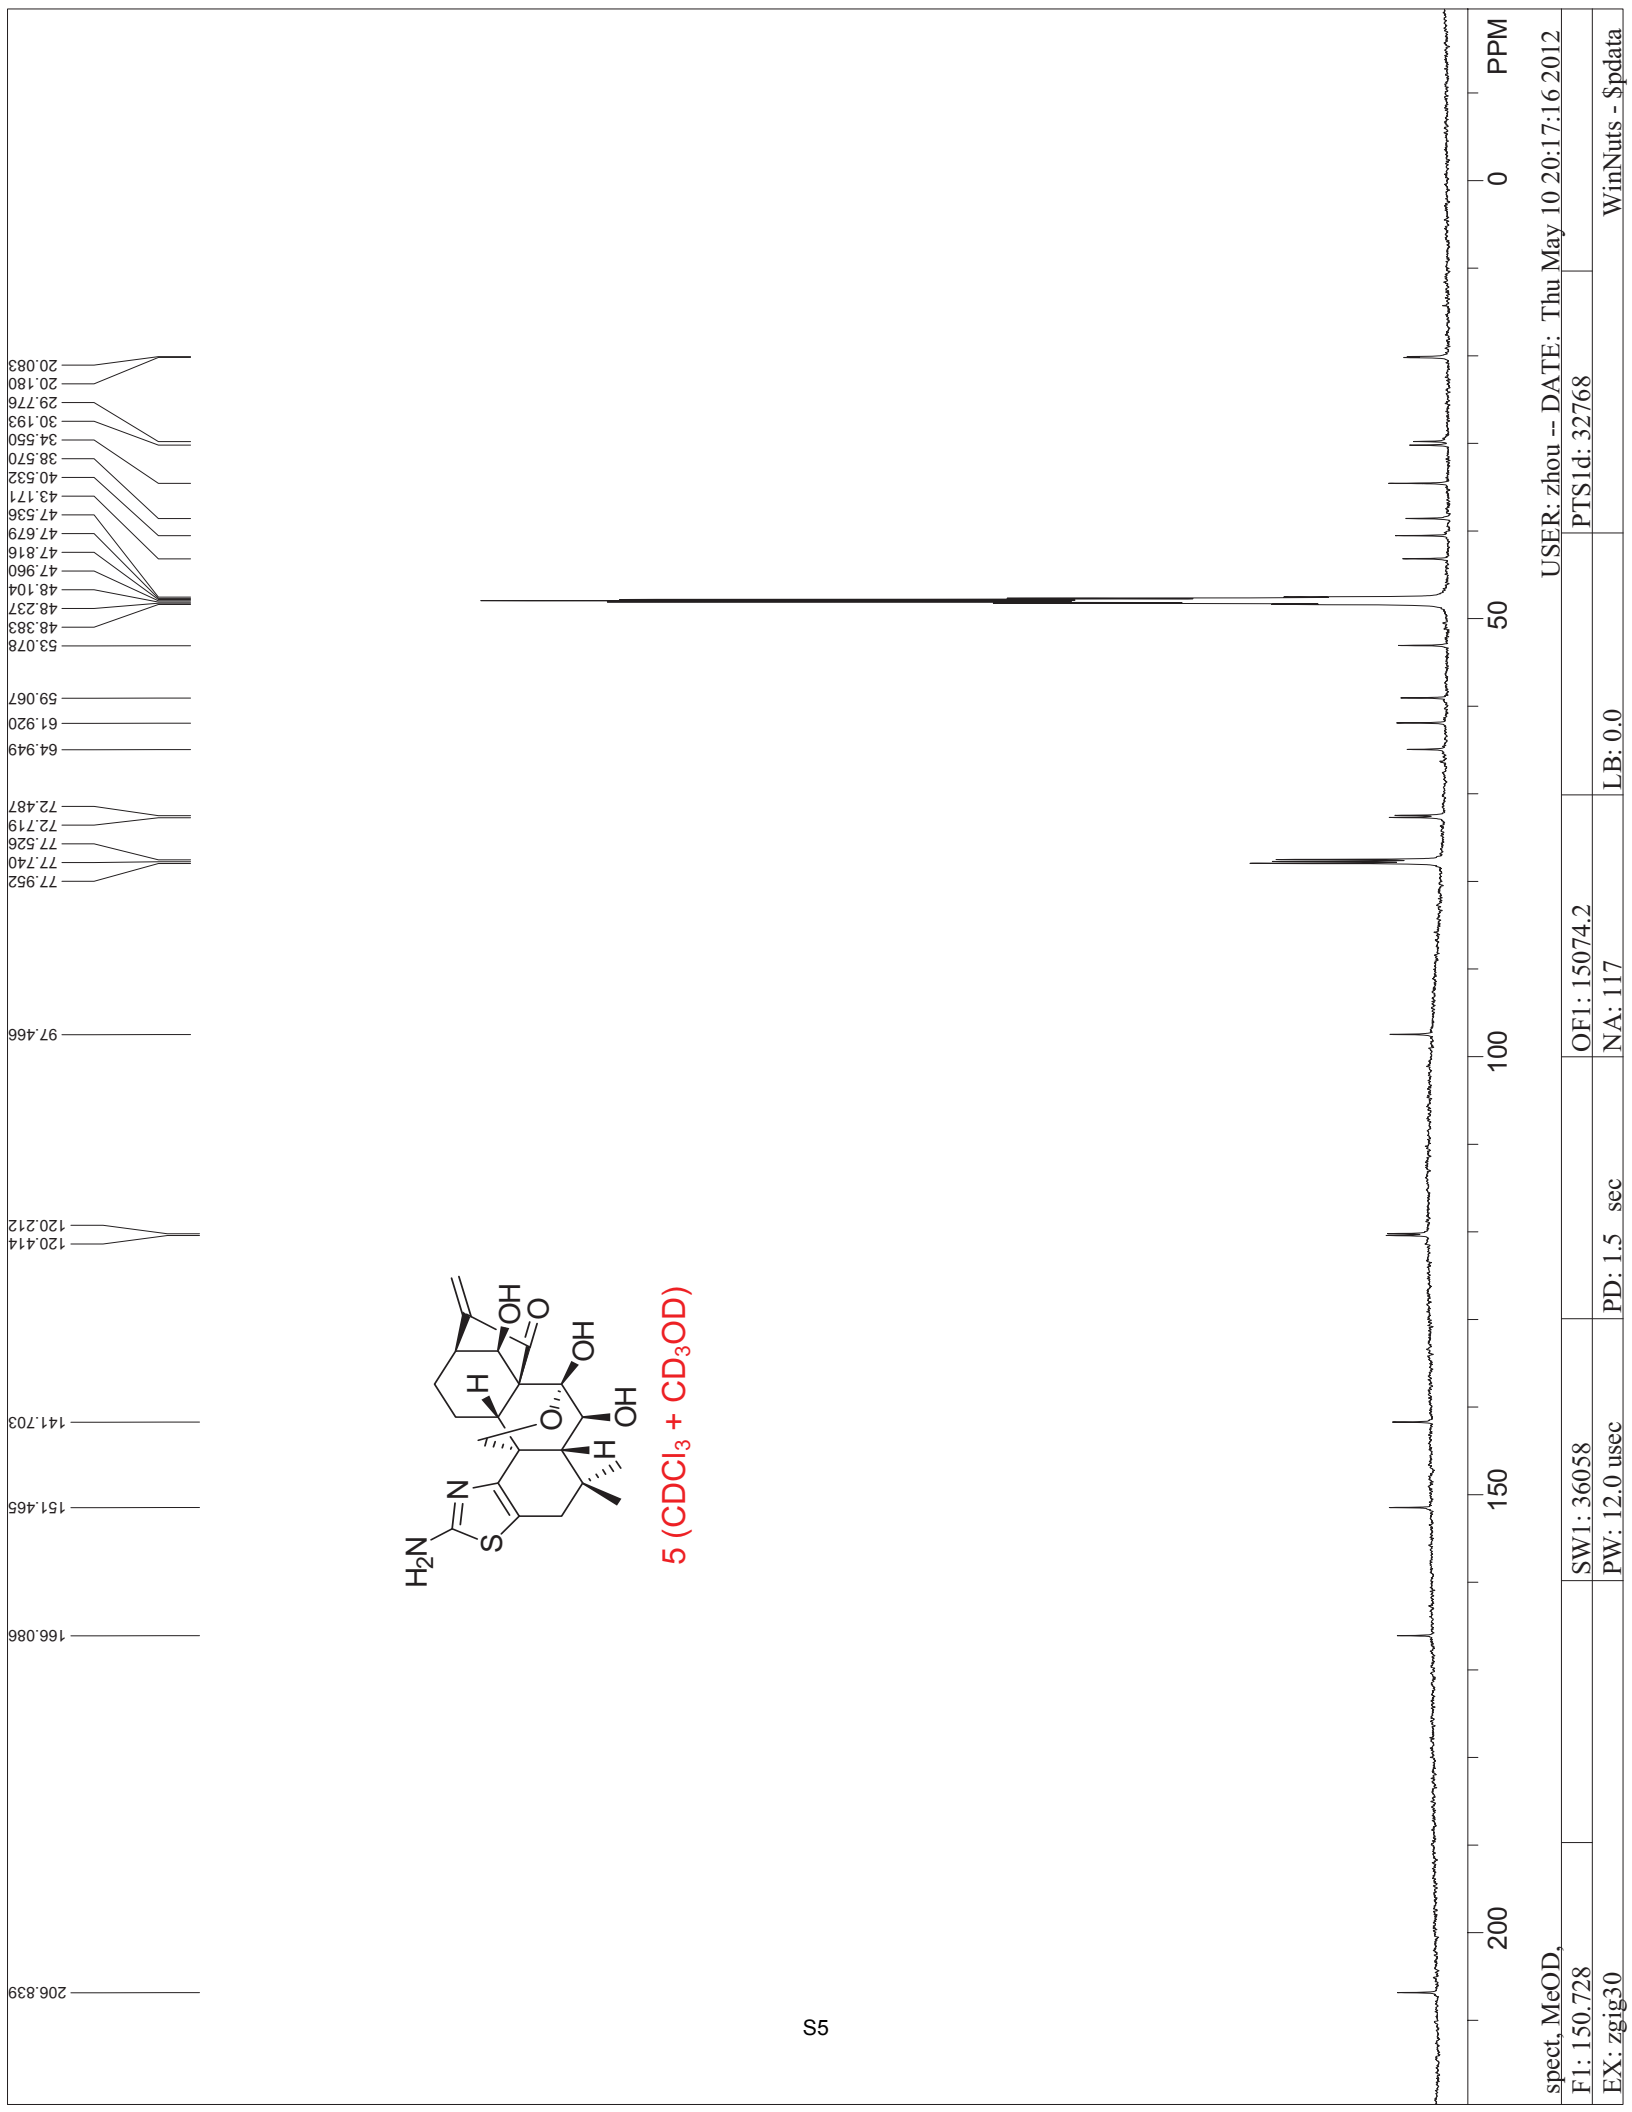

spect, MeOD, USER: zhou -- DATE: Thu May 10 20:17:16 2012  
 F1: 150.728 OF1: 15074.2 PTS1d: 32768  
 EX: zgig30 PD: 1.5 sec NA: 117 LB: 0.0 WinNuts - \$pdata

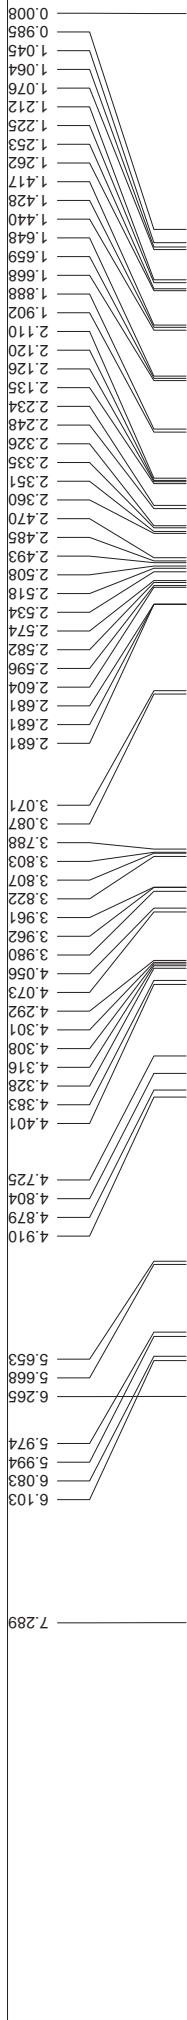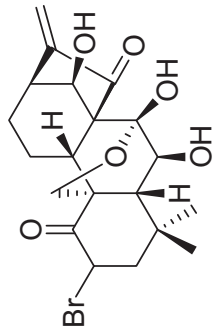

6

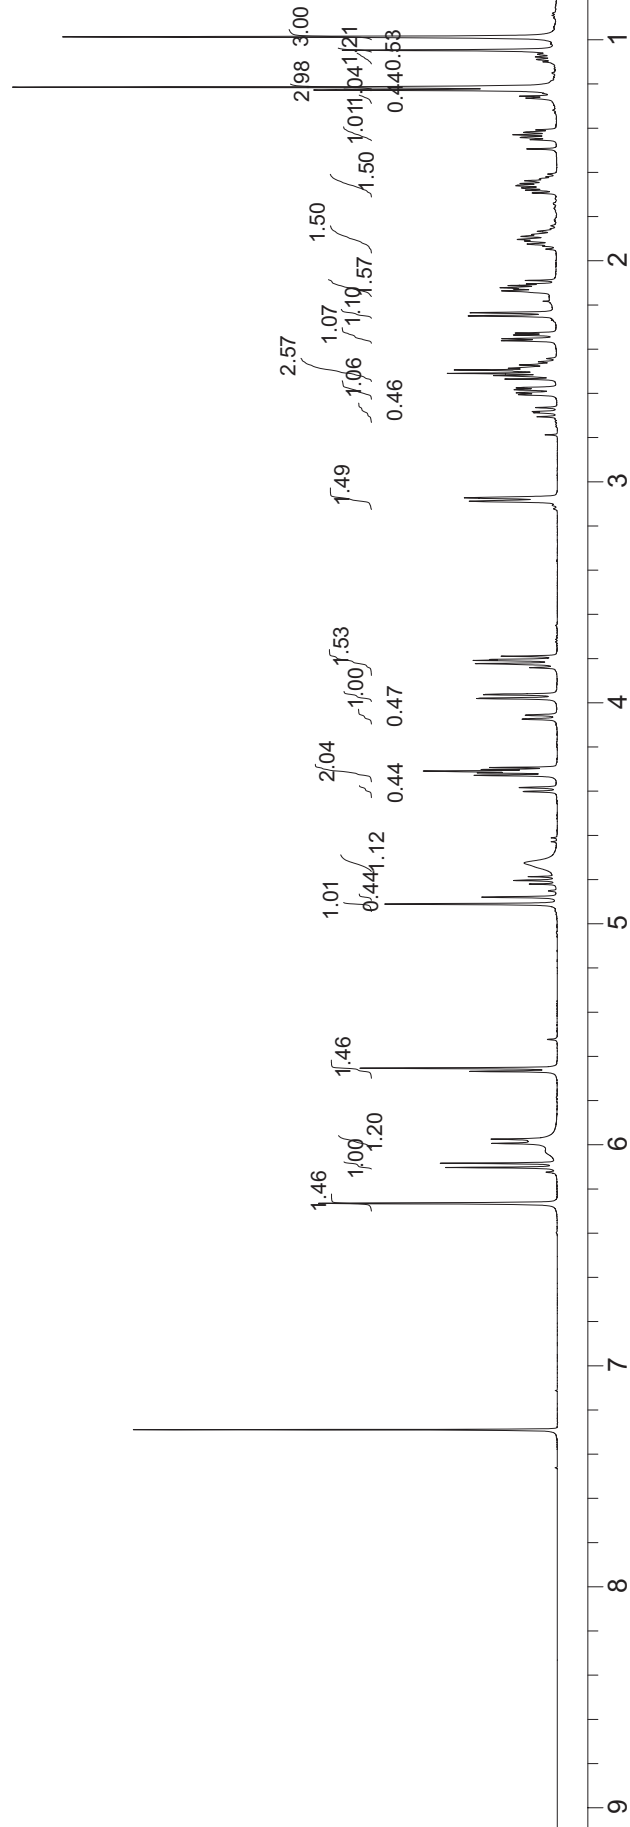

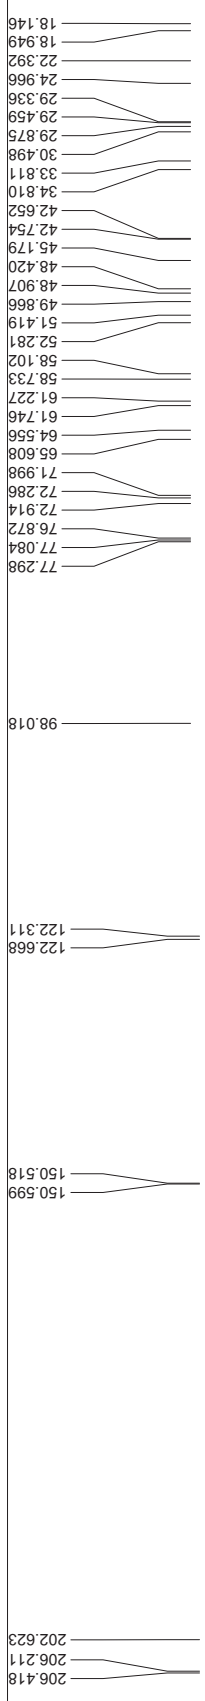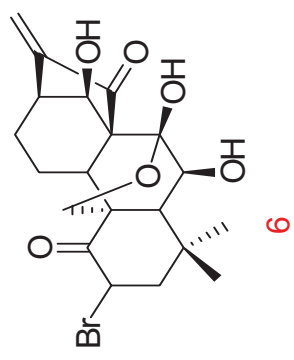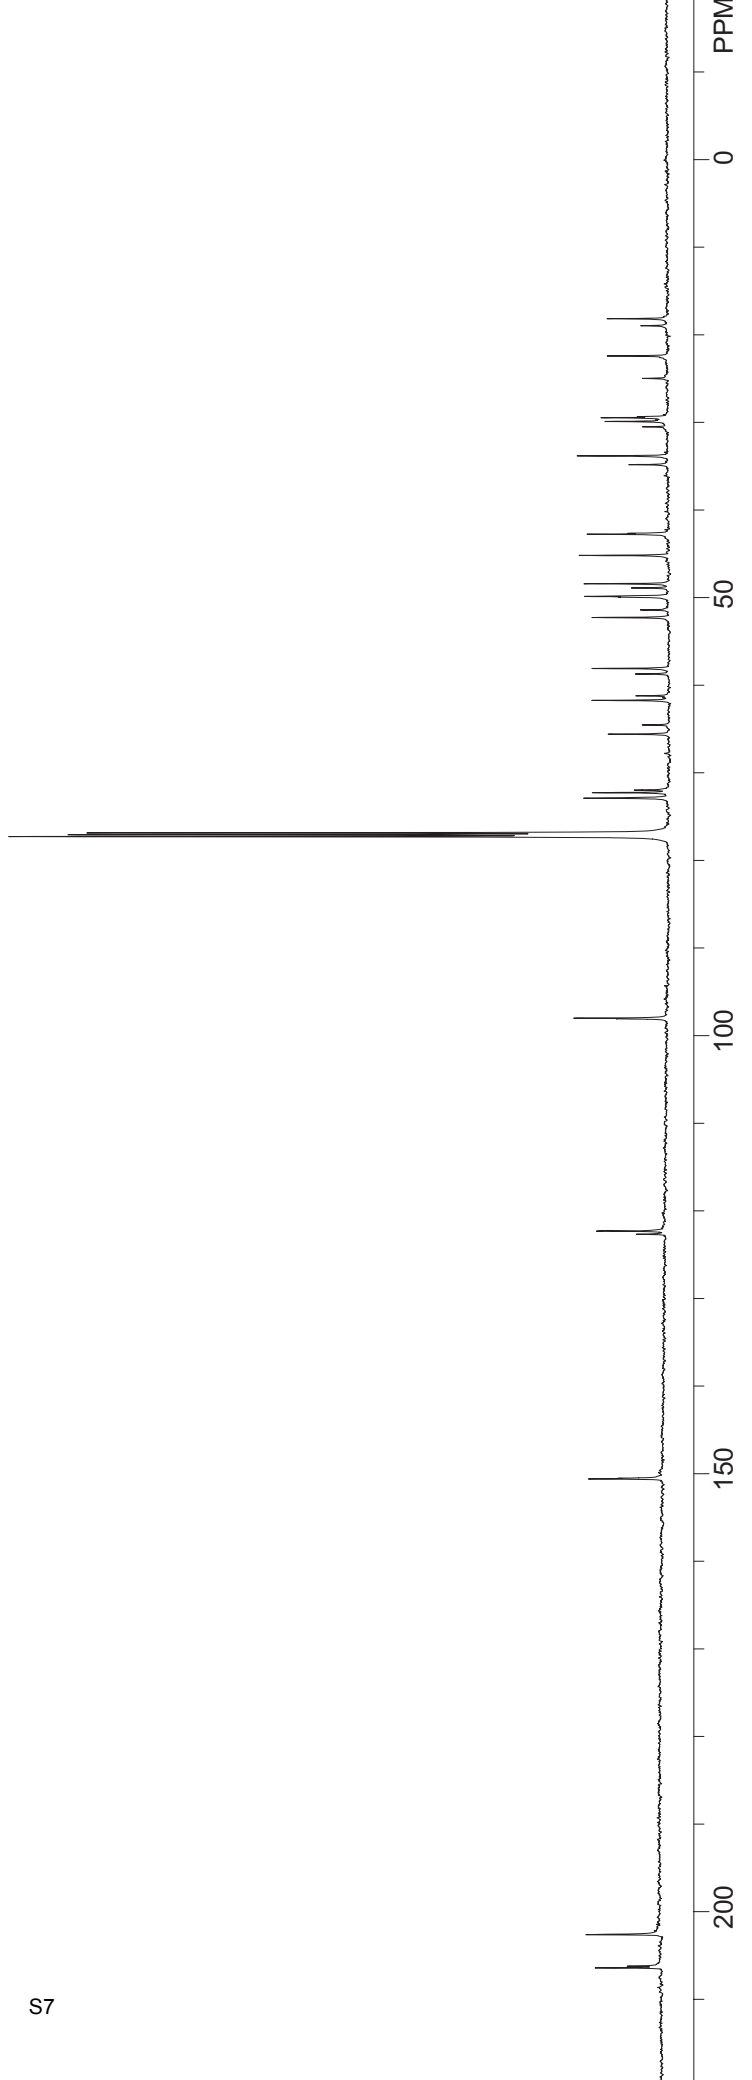

spect, CDCI3, USER: zhou -- DATE: Thu Jun 28 20:42:34 2012  
 F1: 150.728 OF1: 15074.2 PTS1d: 32768  
 EX: zgig30 PD: 1.5 sec NA: 129 LB: 0.0 WinNuts - \$pdata

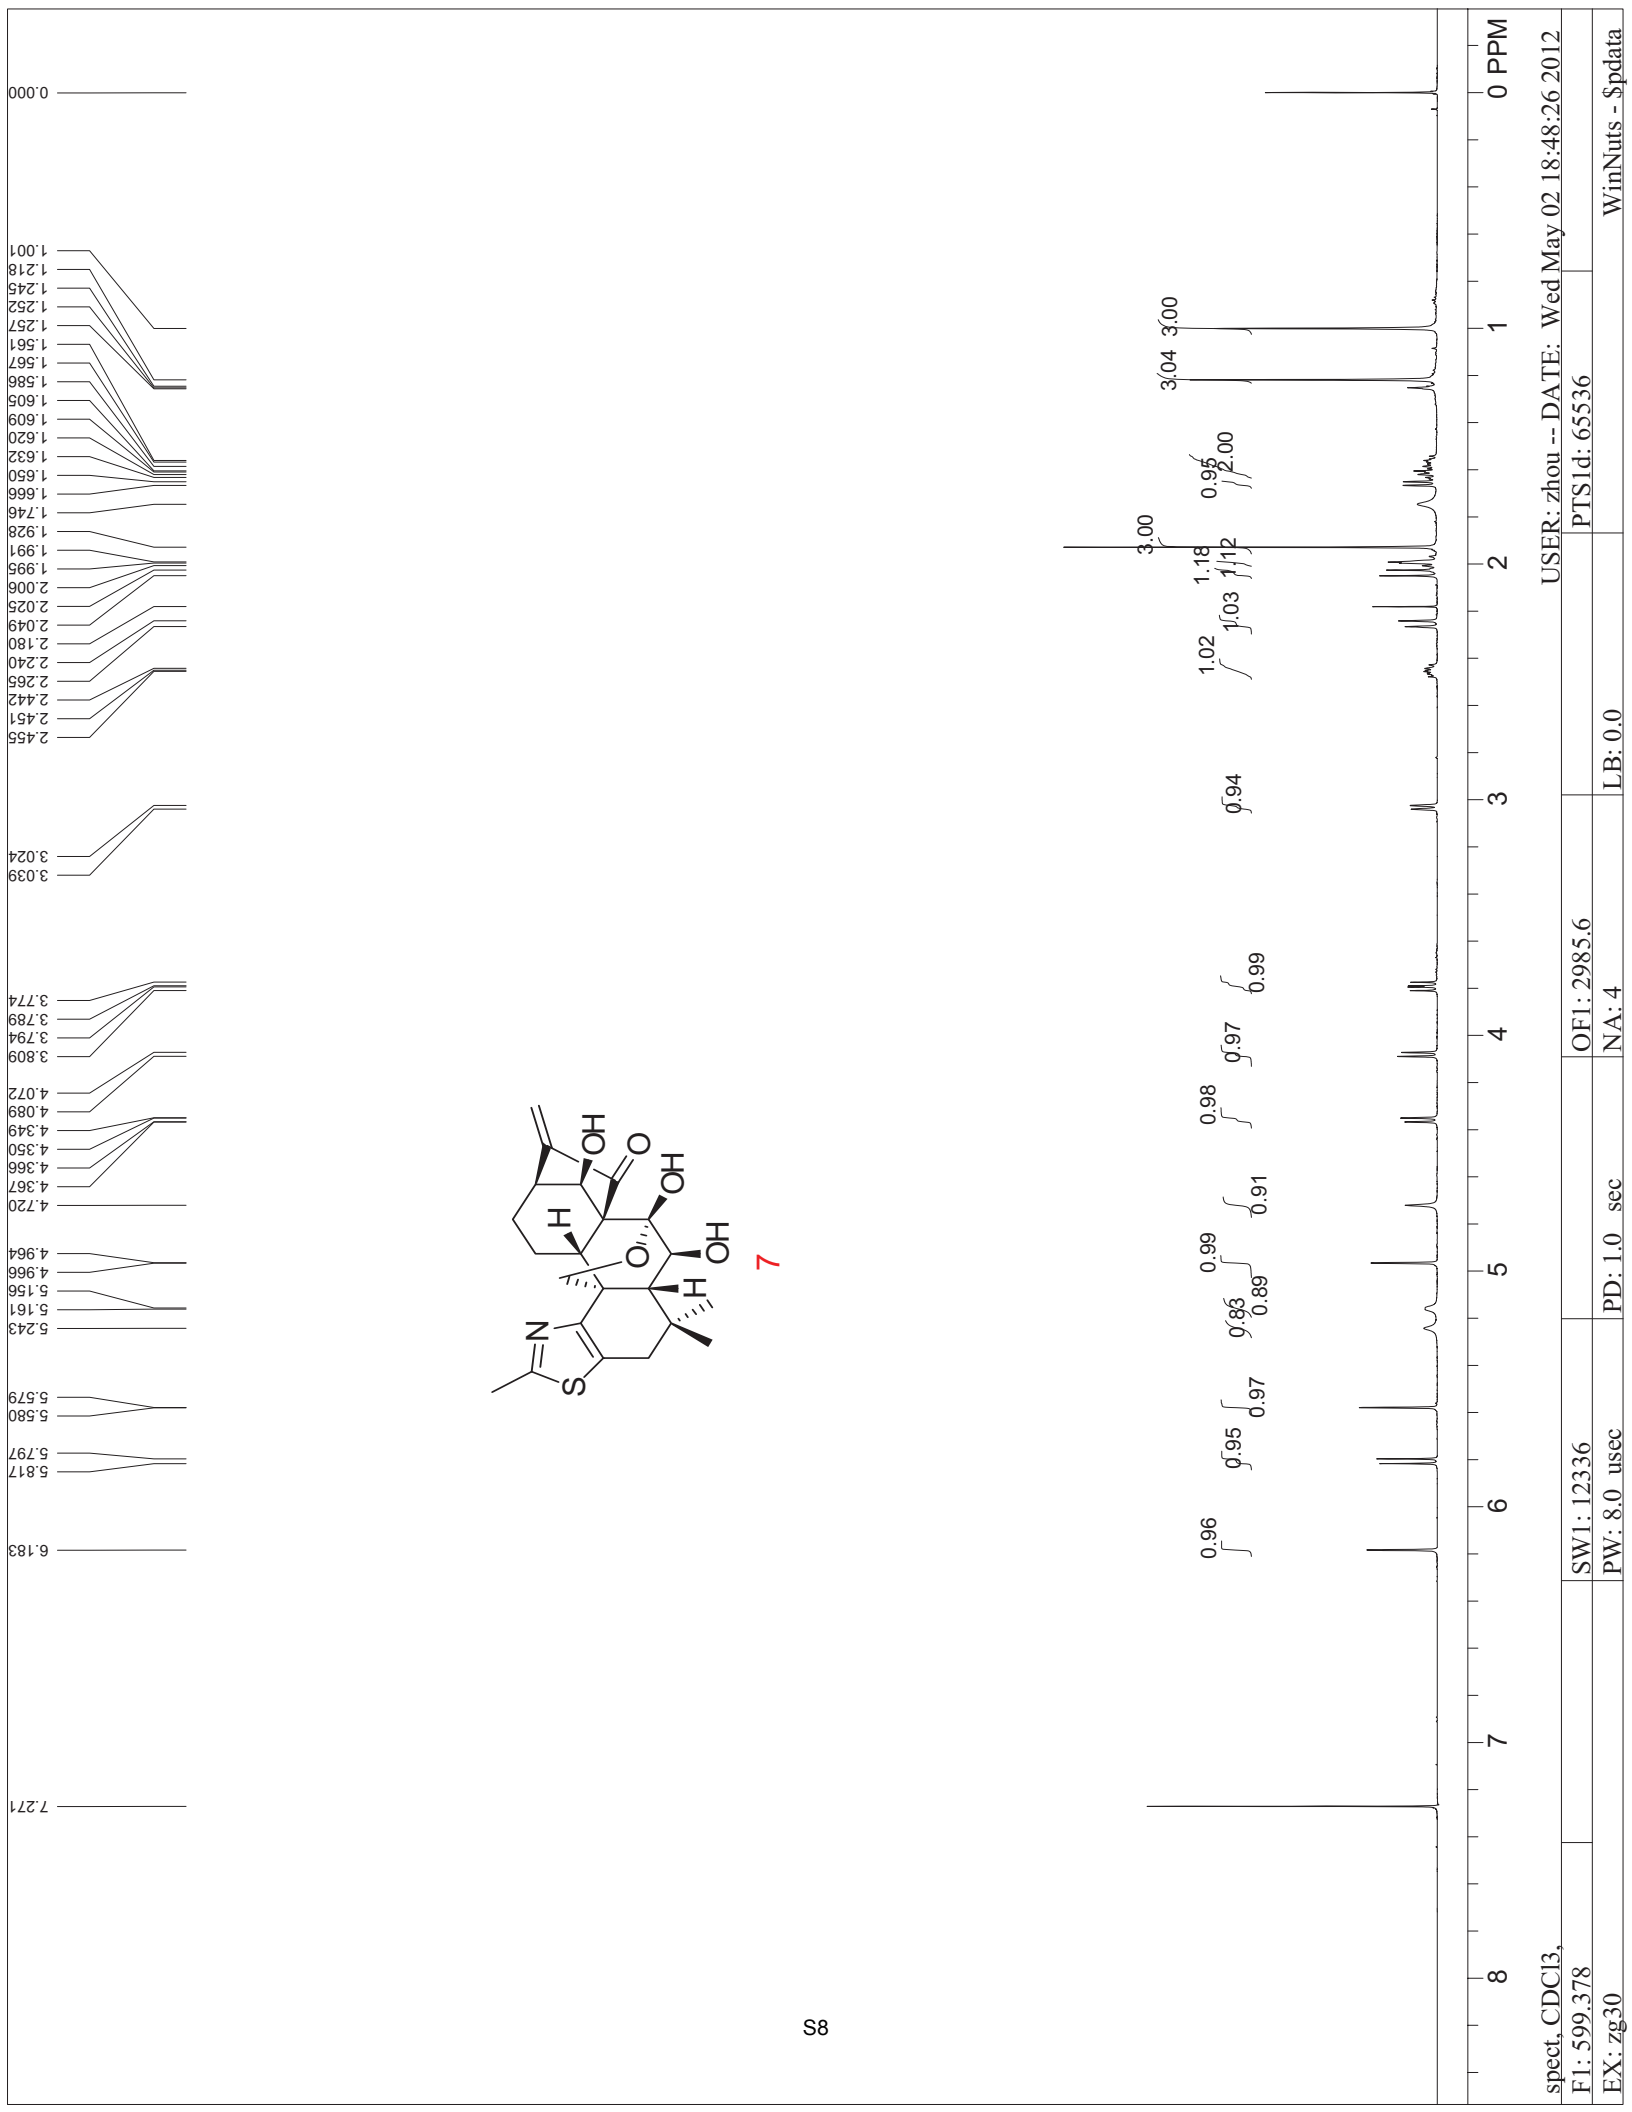



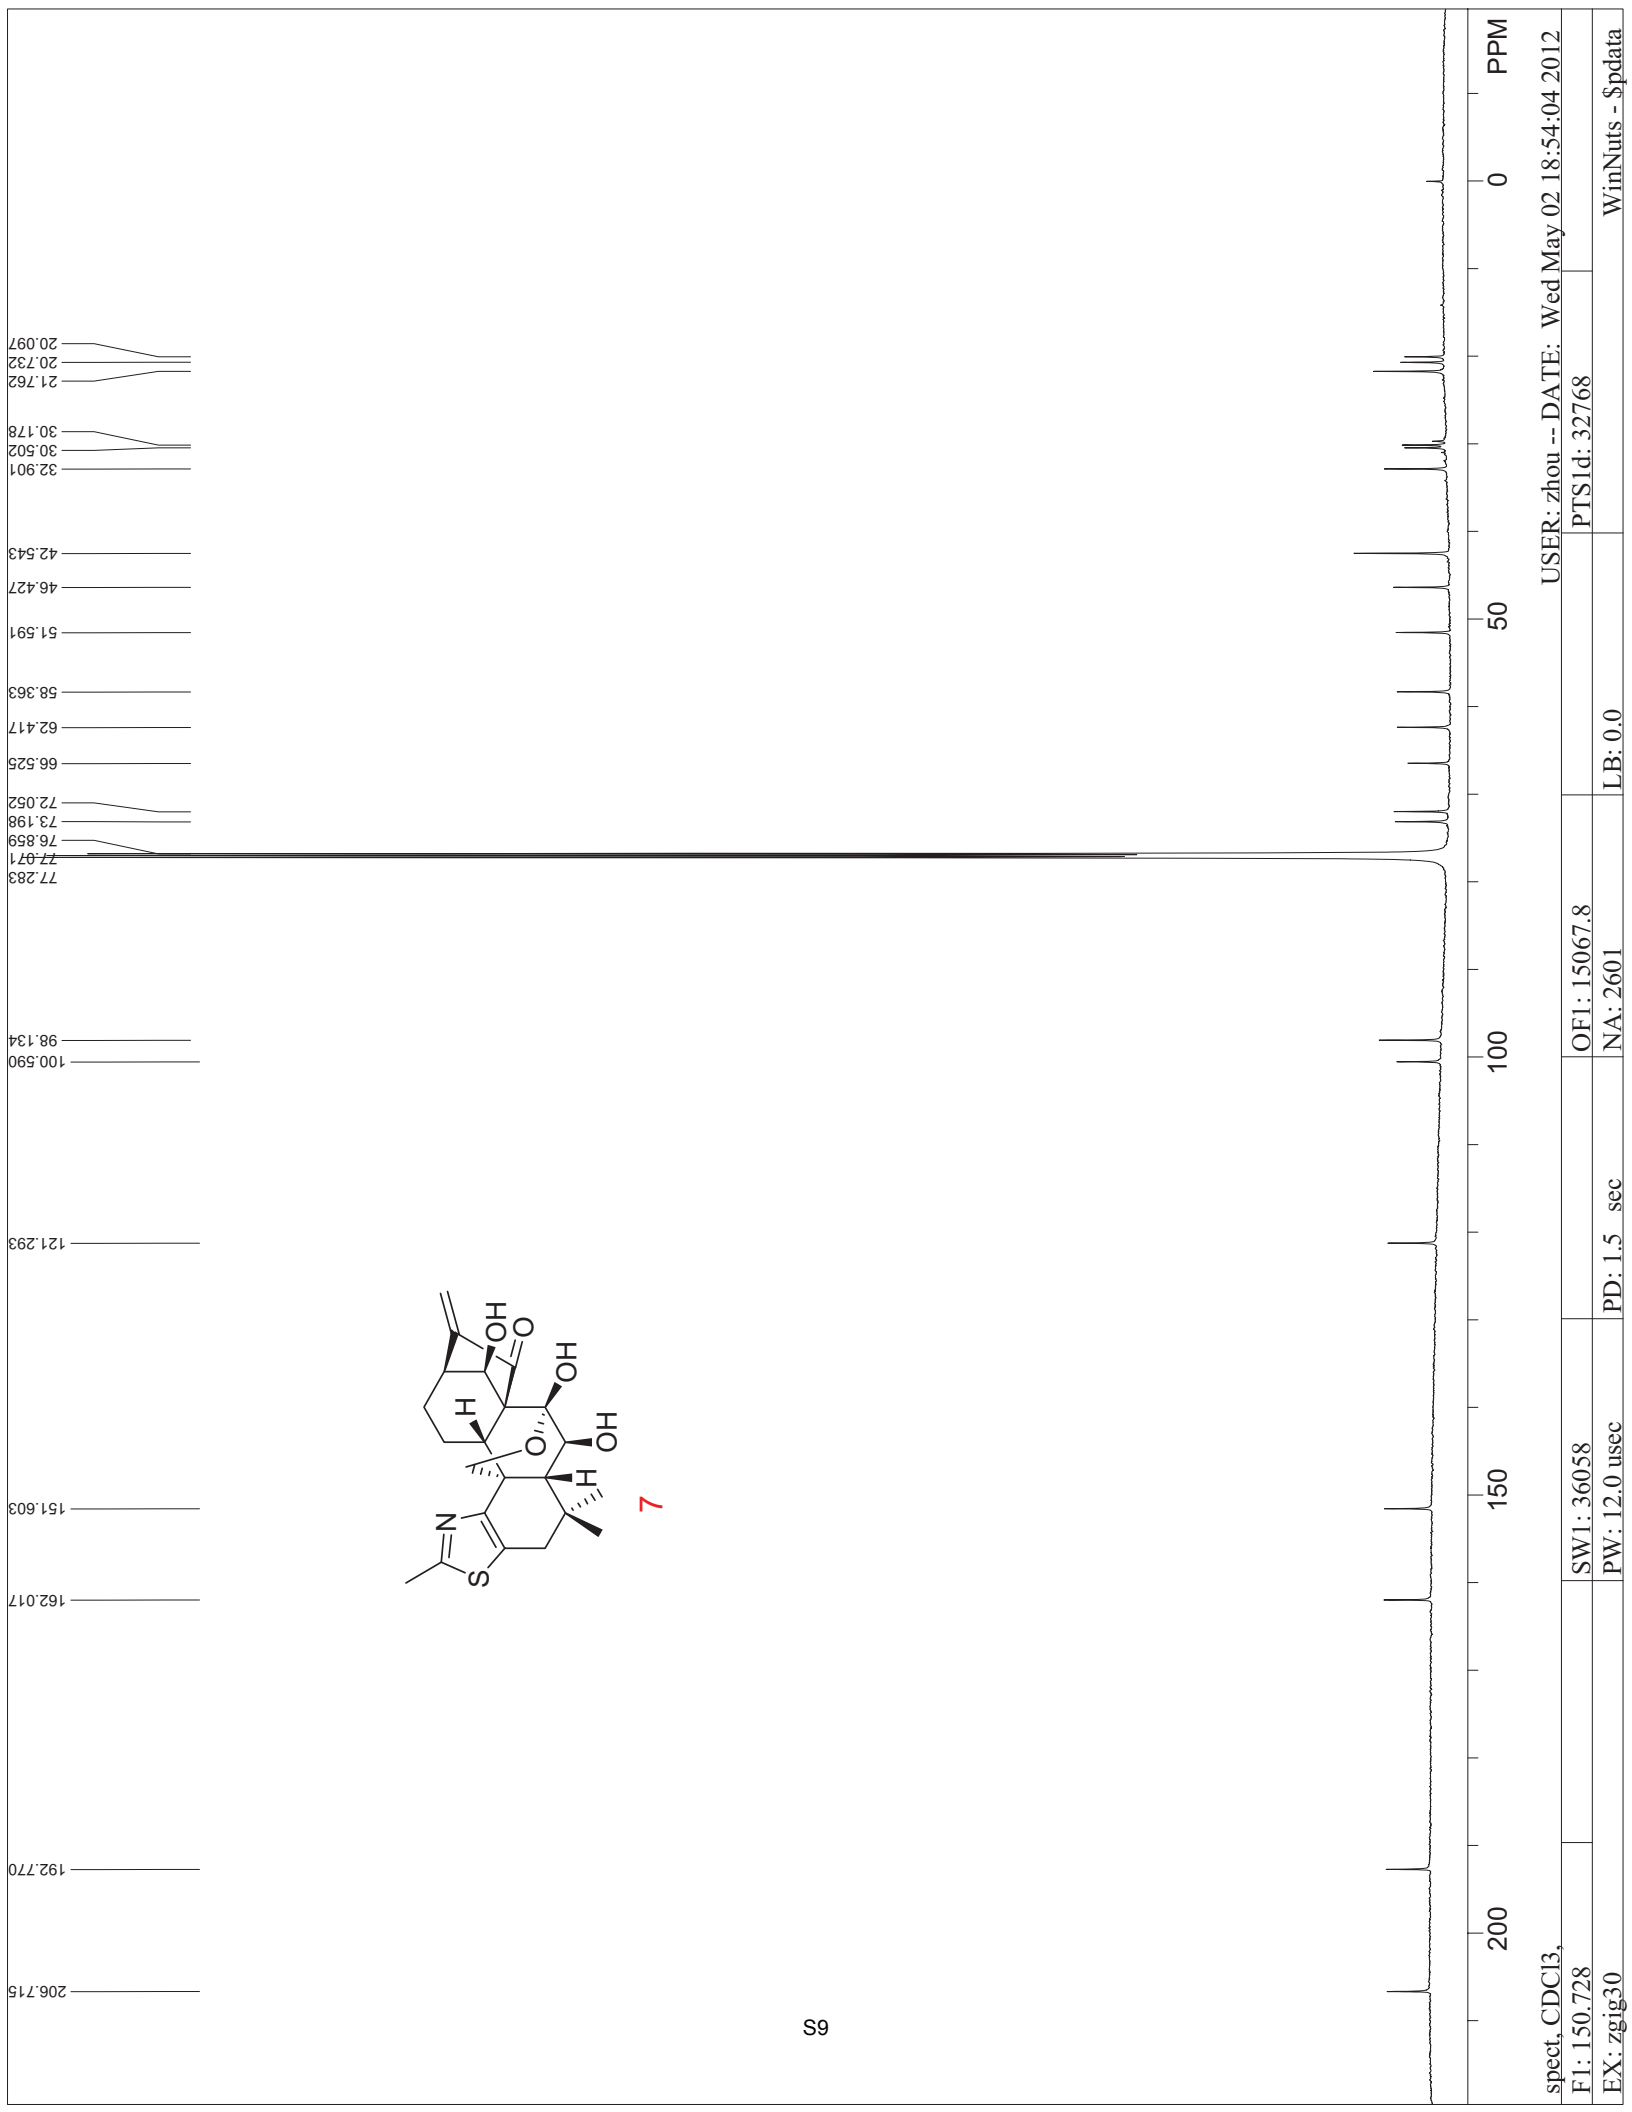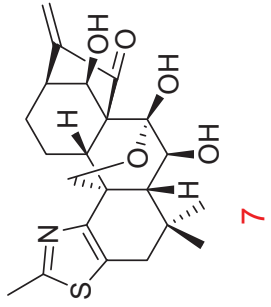

spect, CDCl3, USER: zhou -- DATE: Wed May 02 18:54:04 2012  
 F1: 150.728 OF1: 15067.8 PTS1d: 32768  
 EX: zgig30 PD: 1.5 sec NA: 2601 LB: 0.0 WinNuts - \$pdata

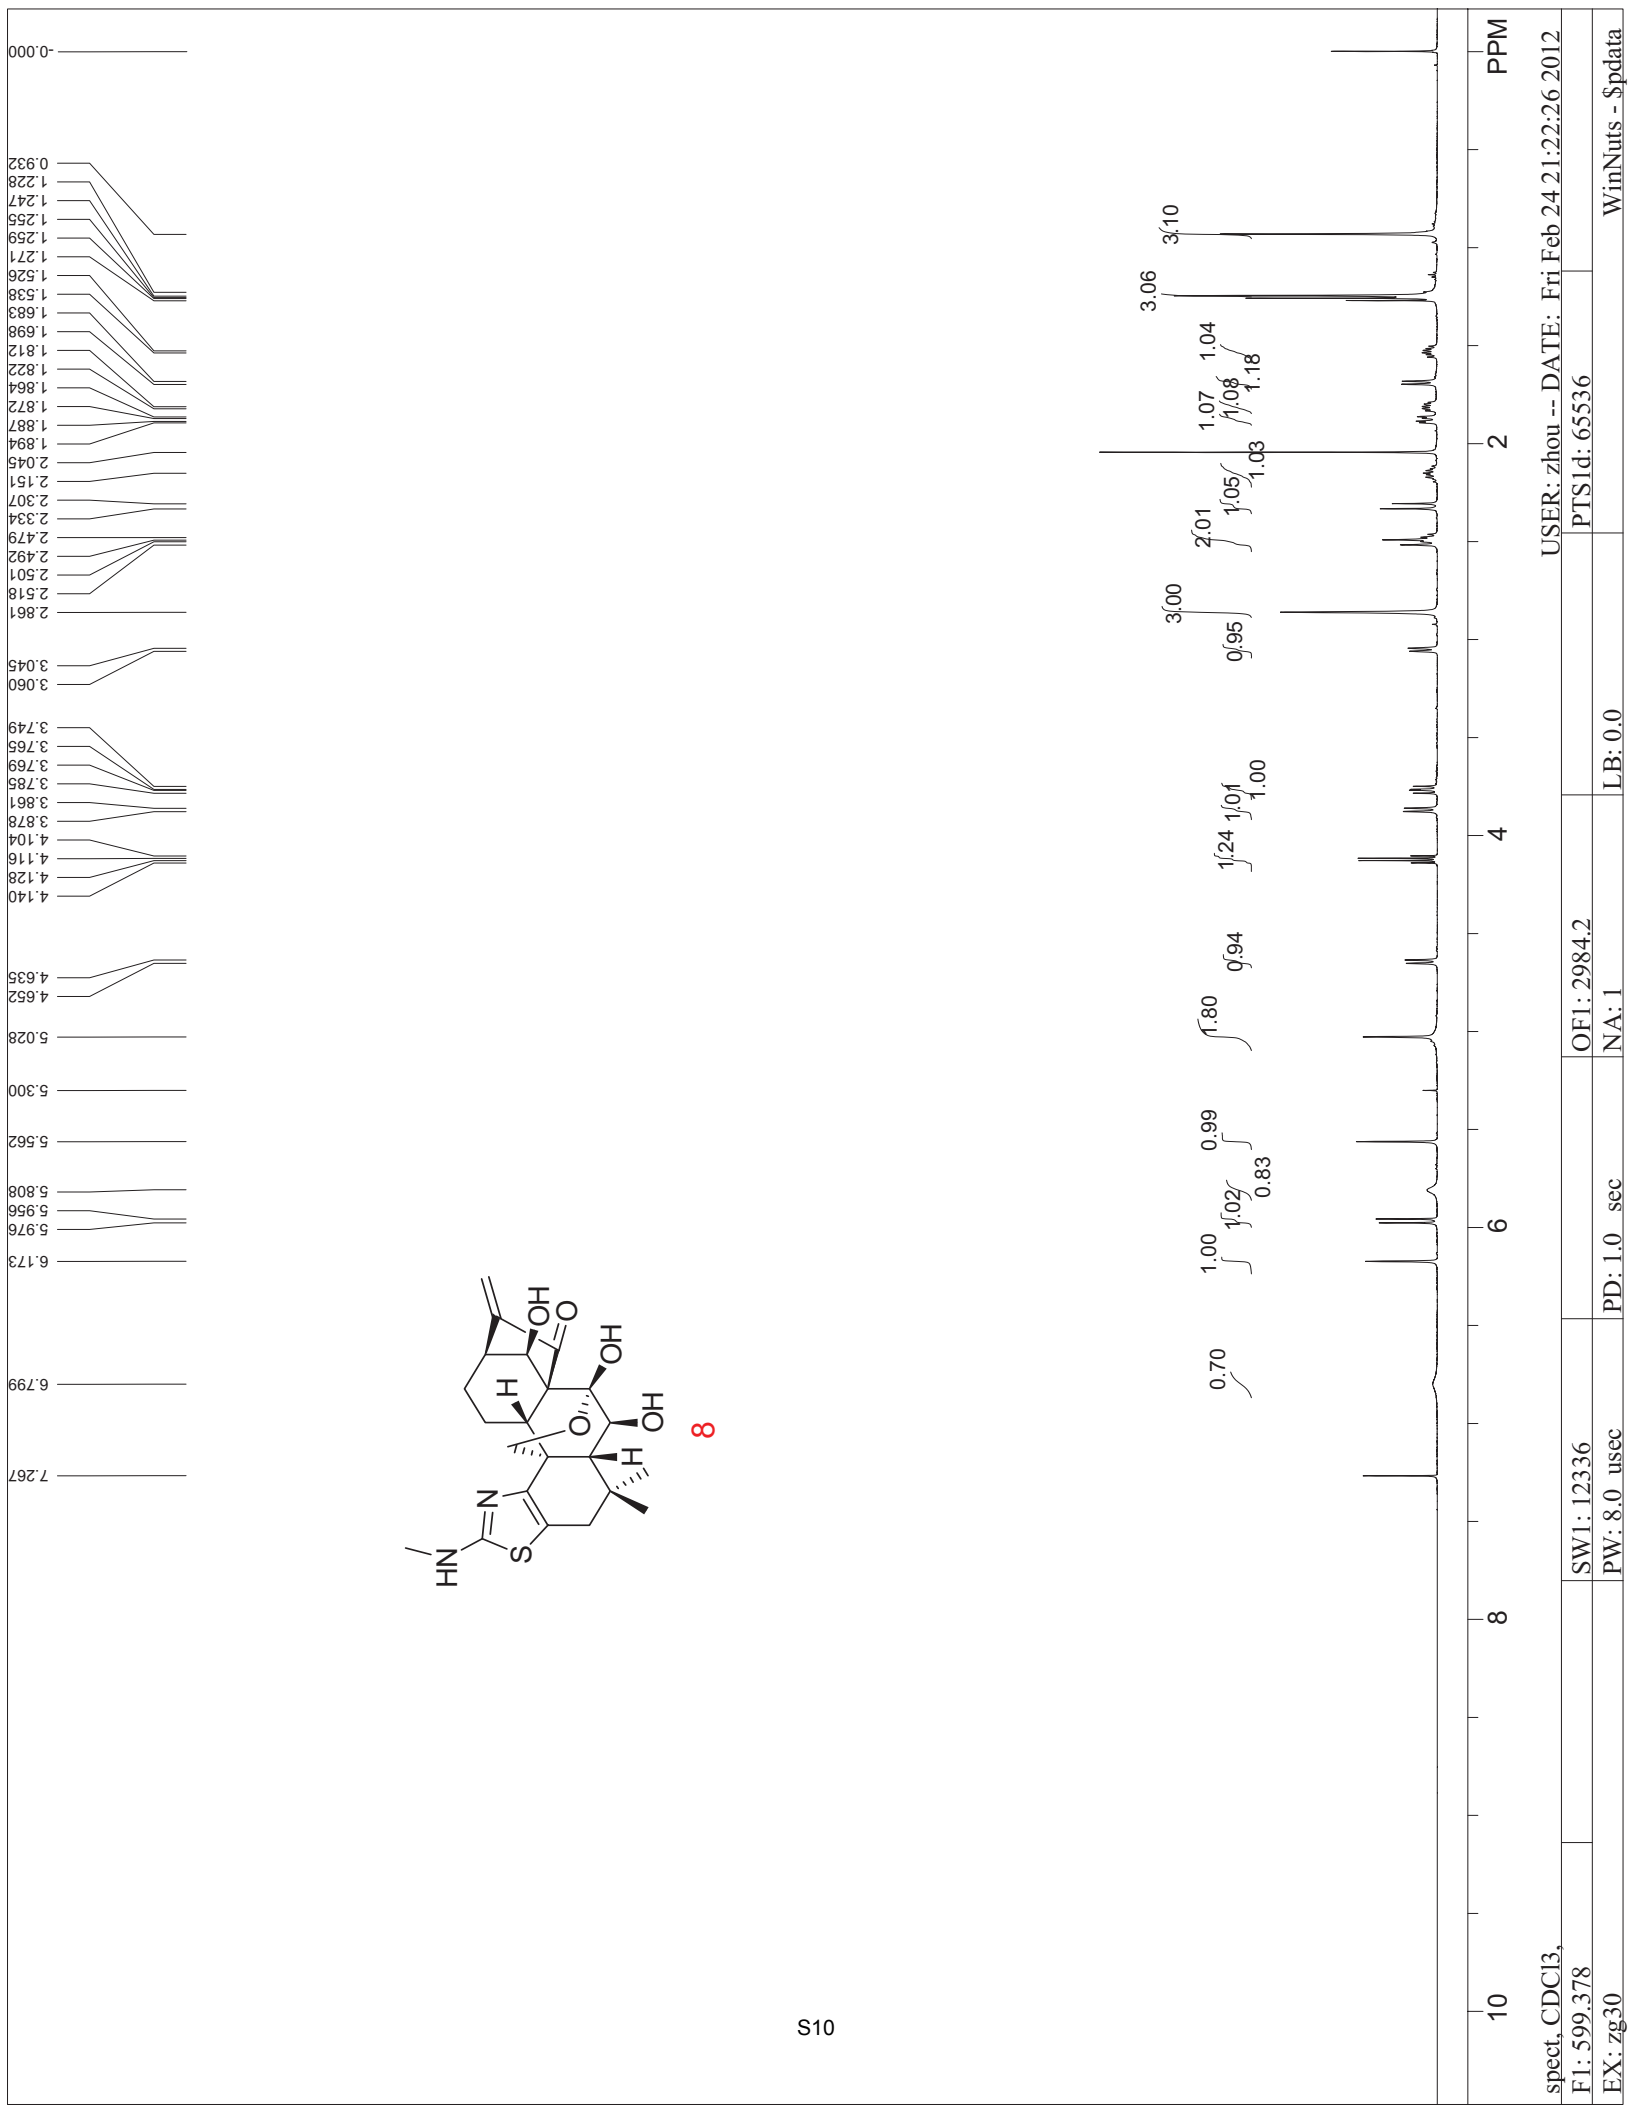

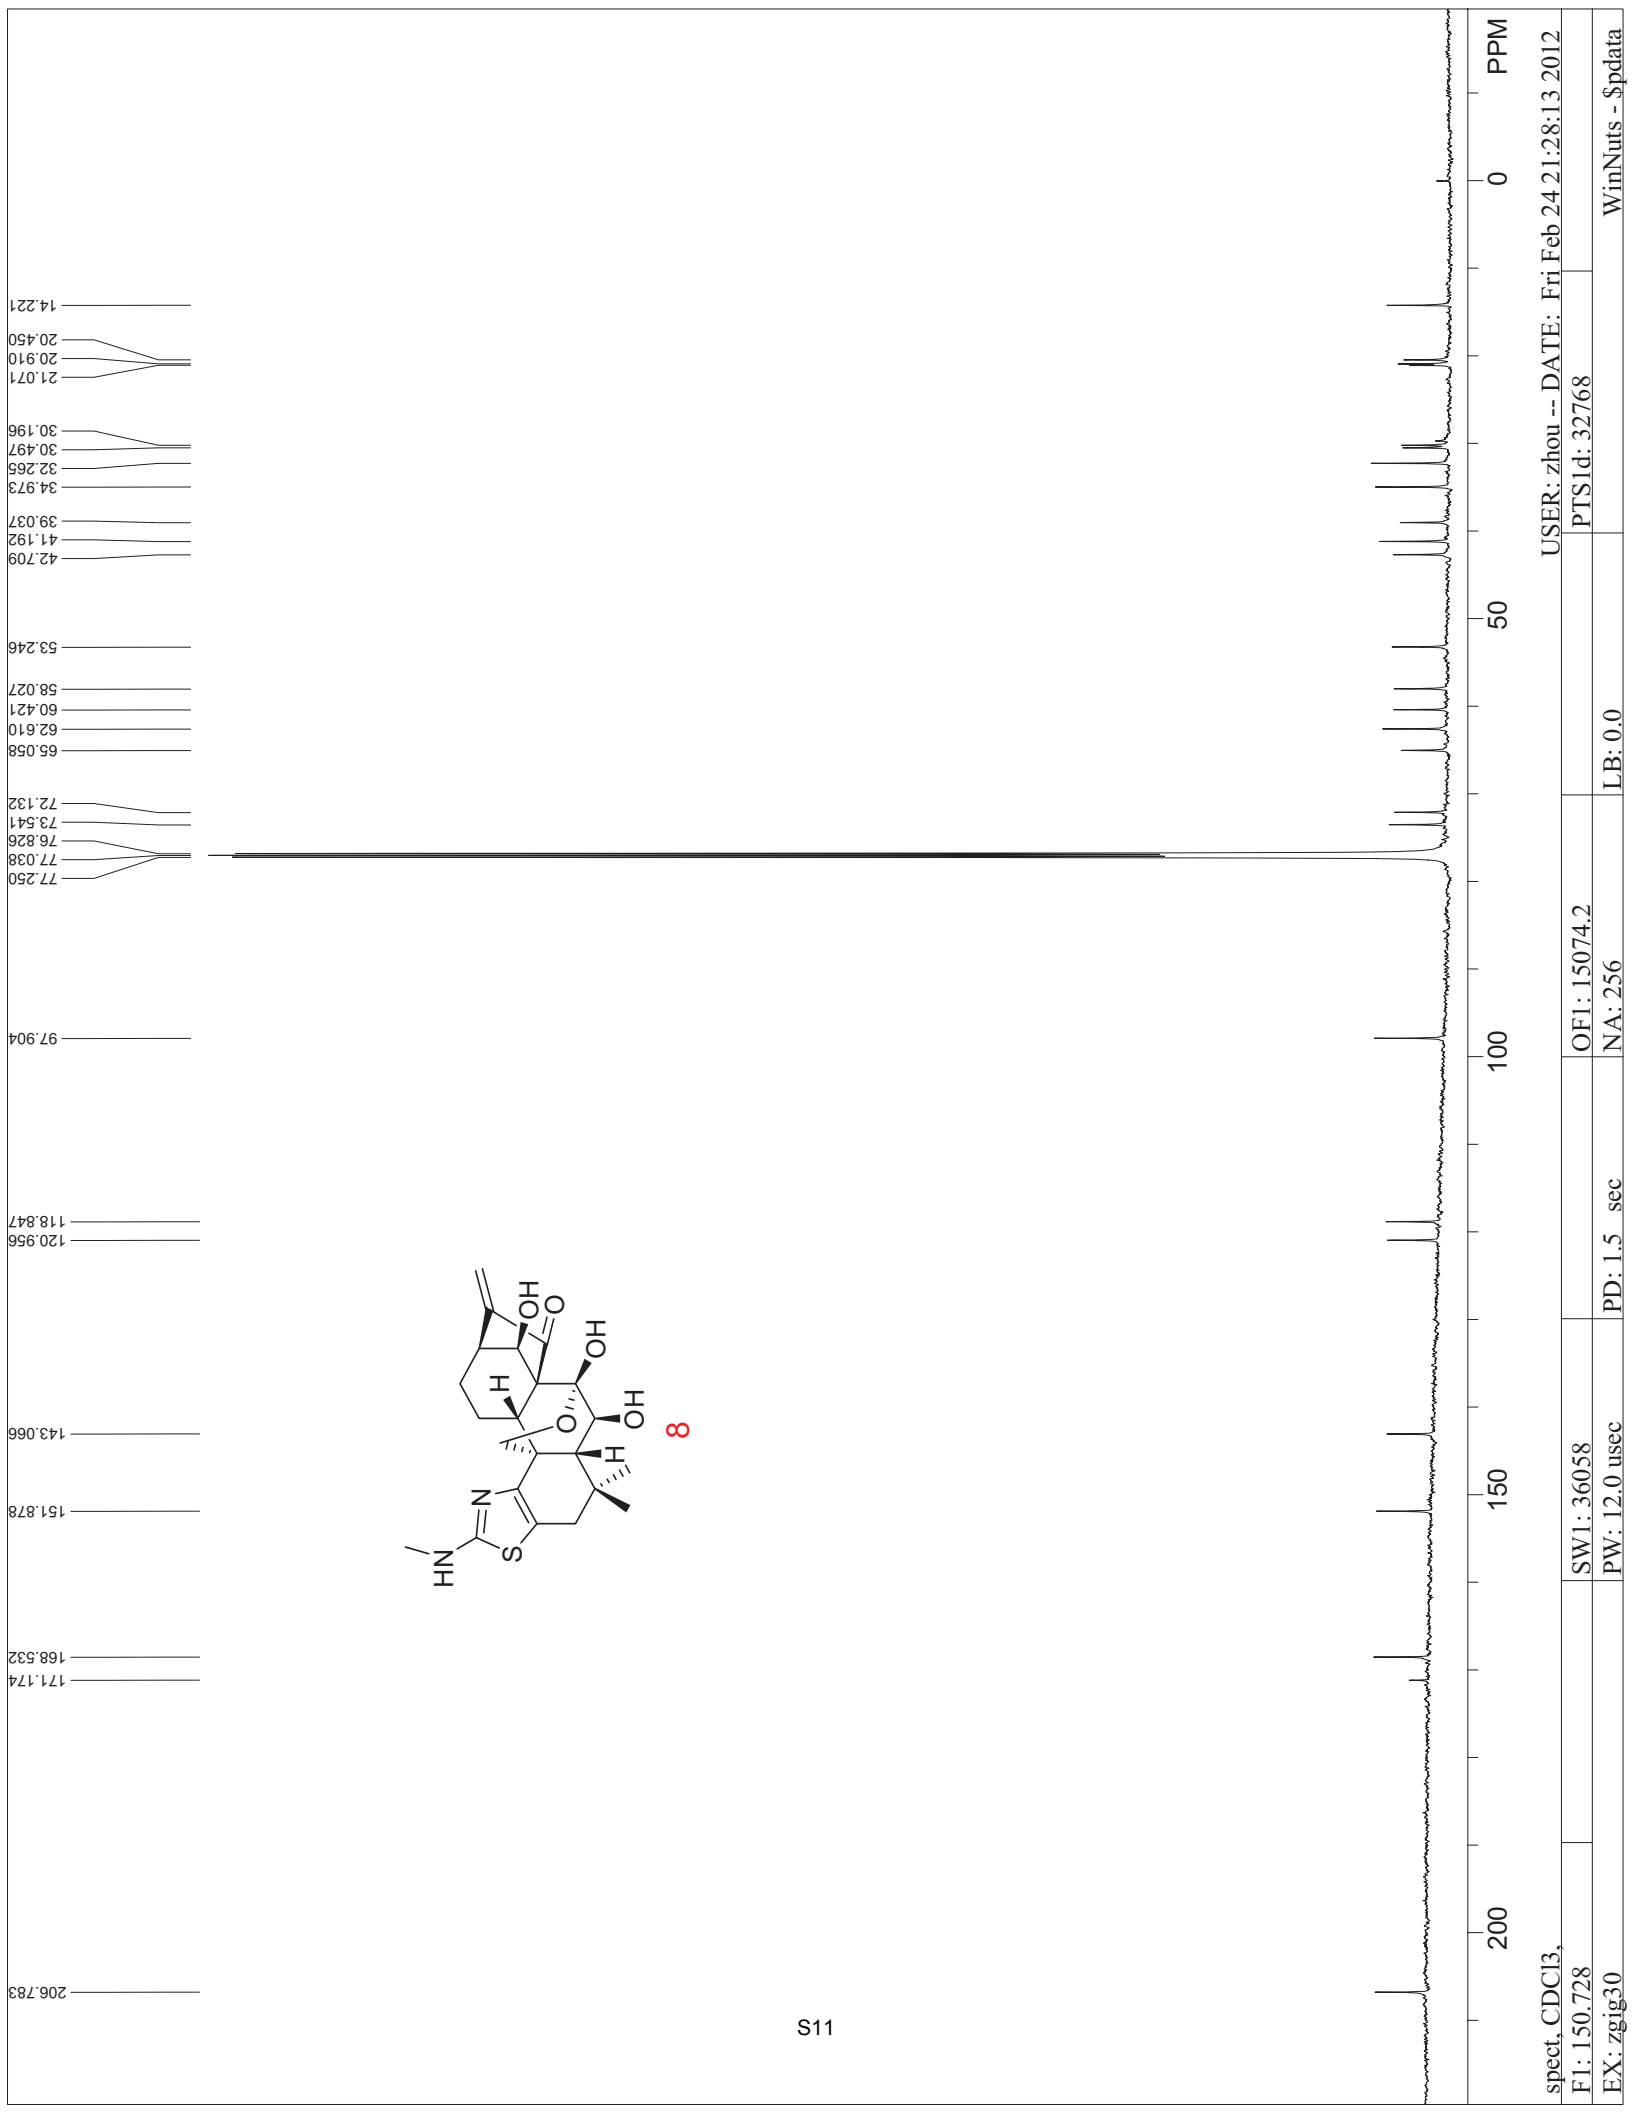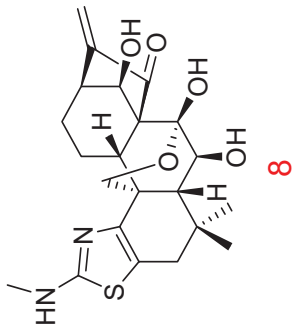

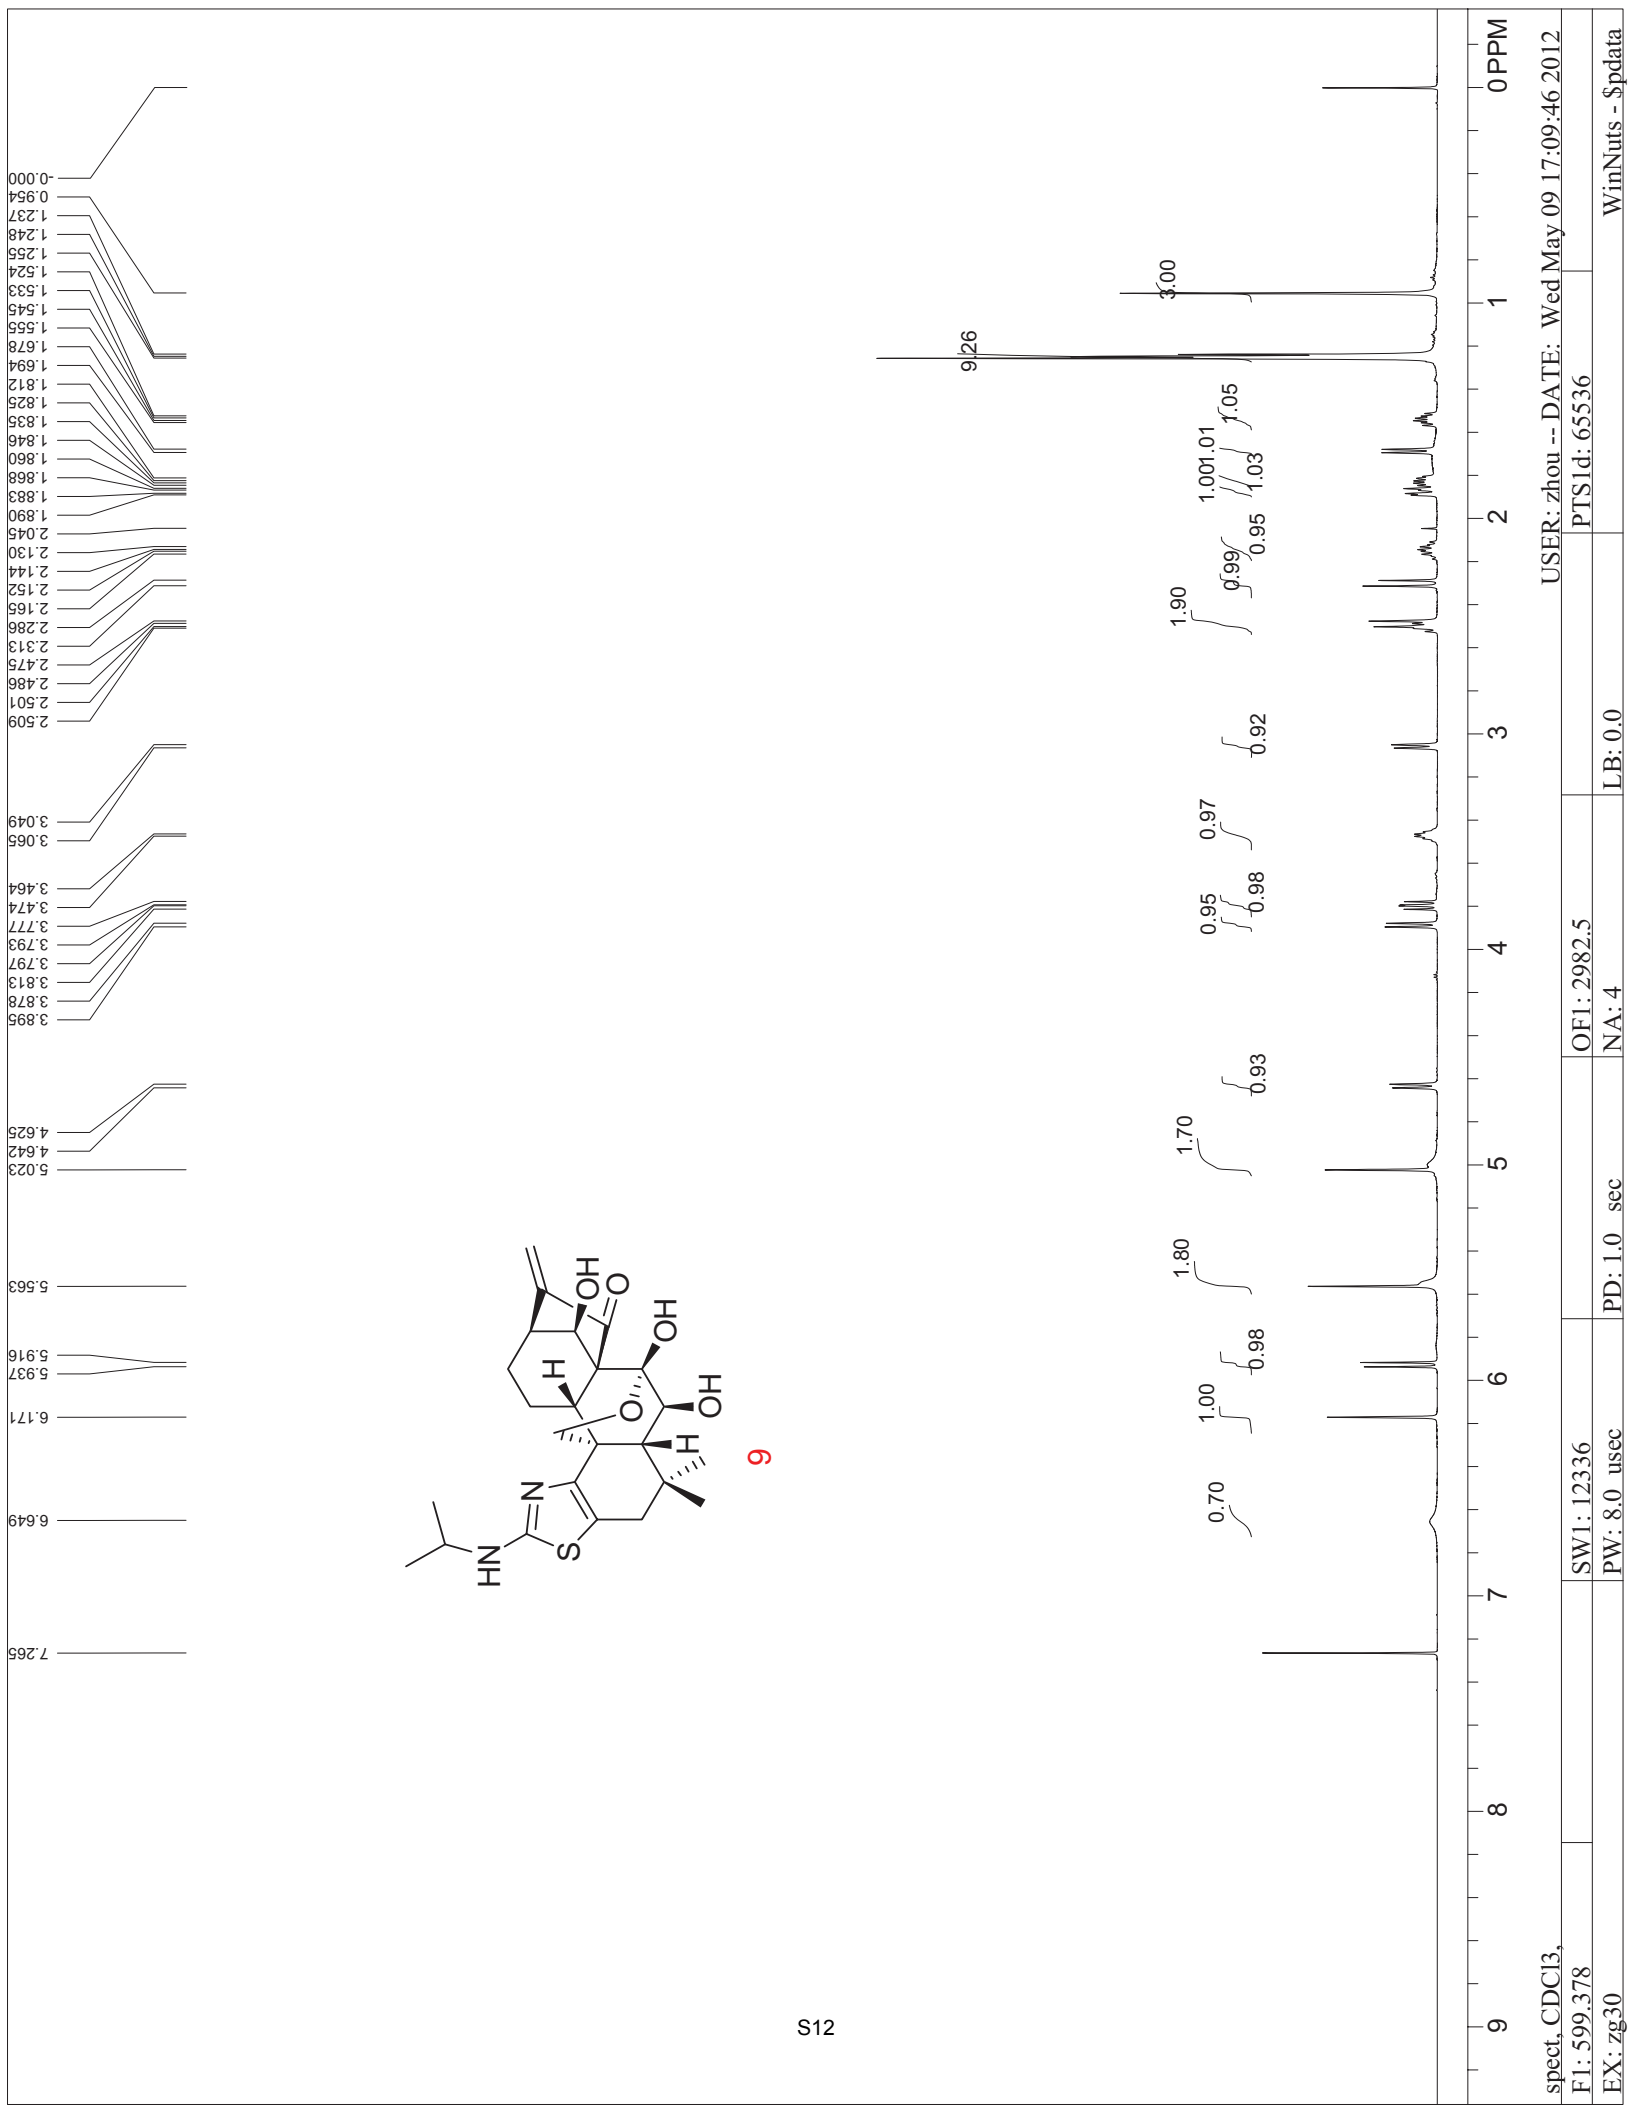

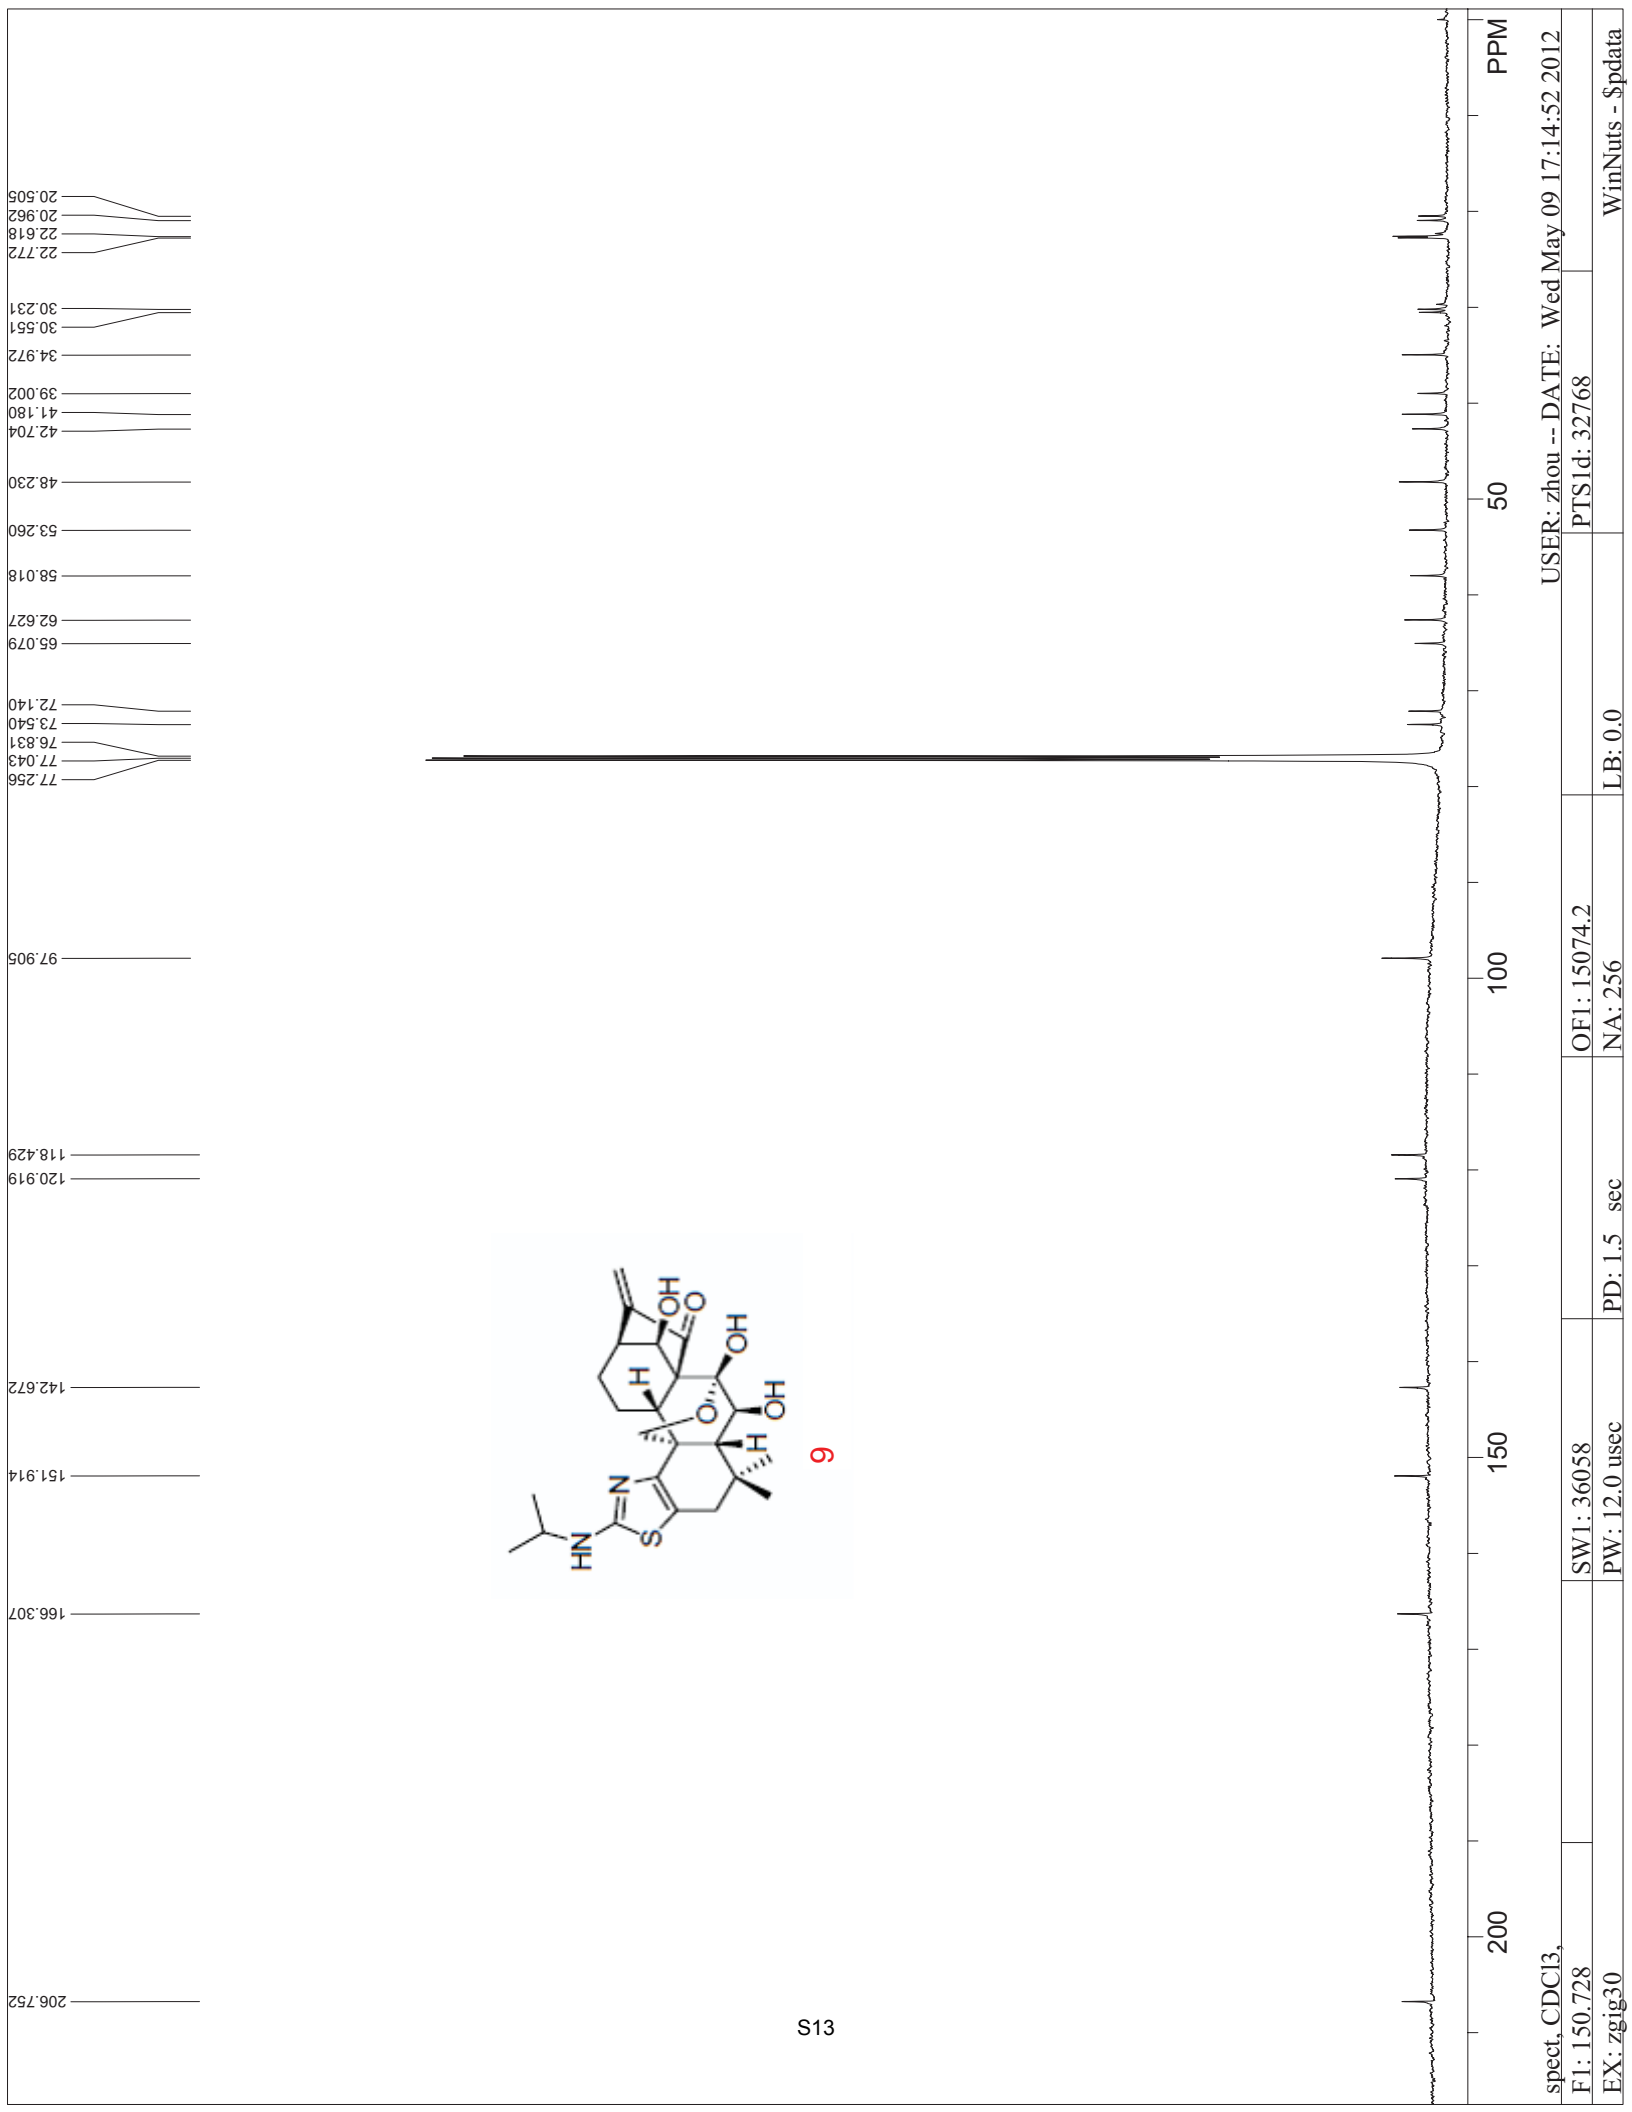

USER: zhou -- DATE: Wed May 09 17:14:52 2012

PTSId: 32768

OF1: 15074.2

NA: 256

PD: 1.5 sec

SW1: 36058

PW: 12.0 usec

WinNuts - \$pdata

LB: 0.0

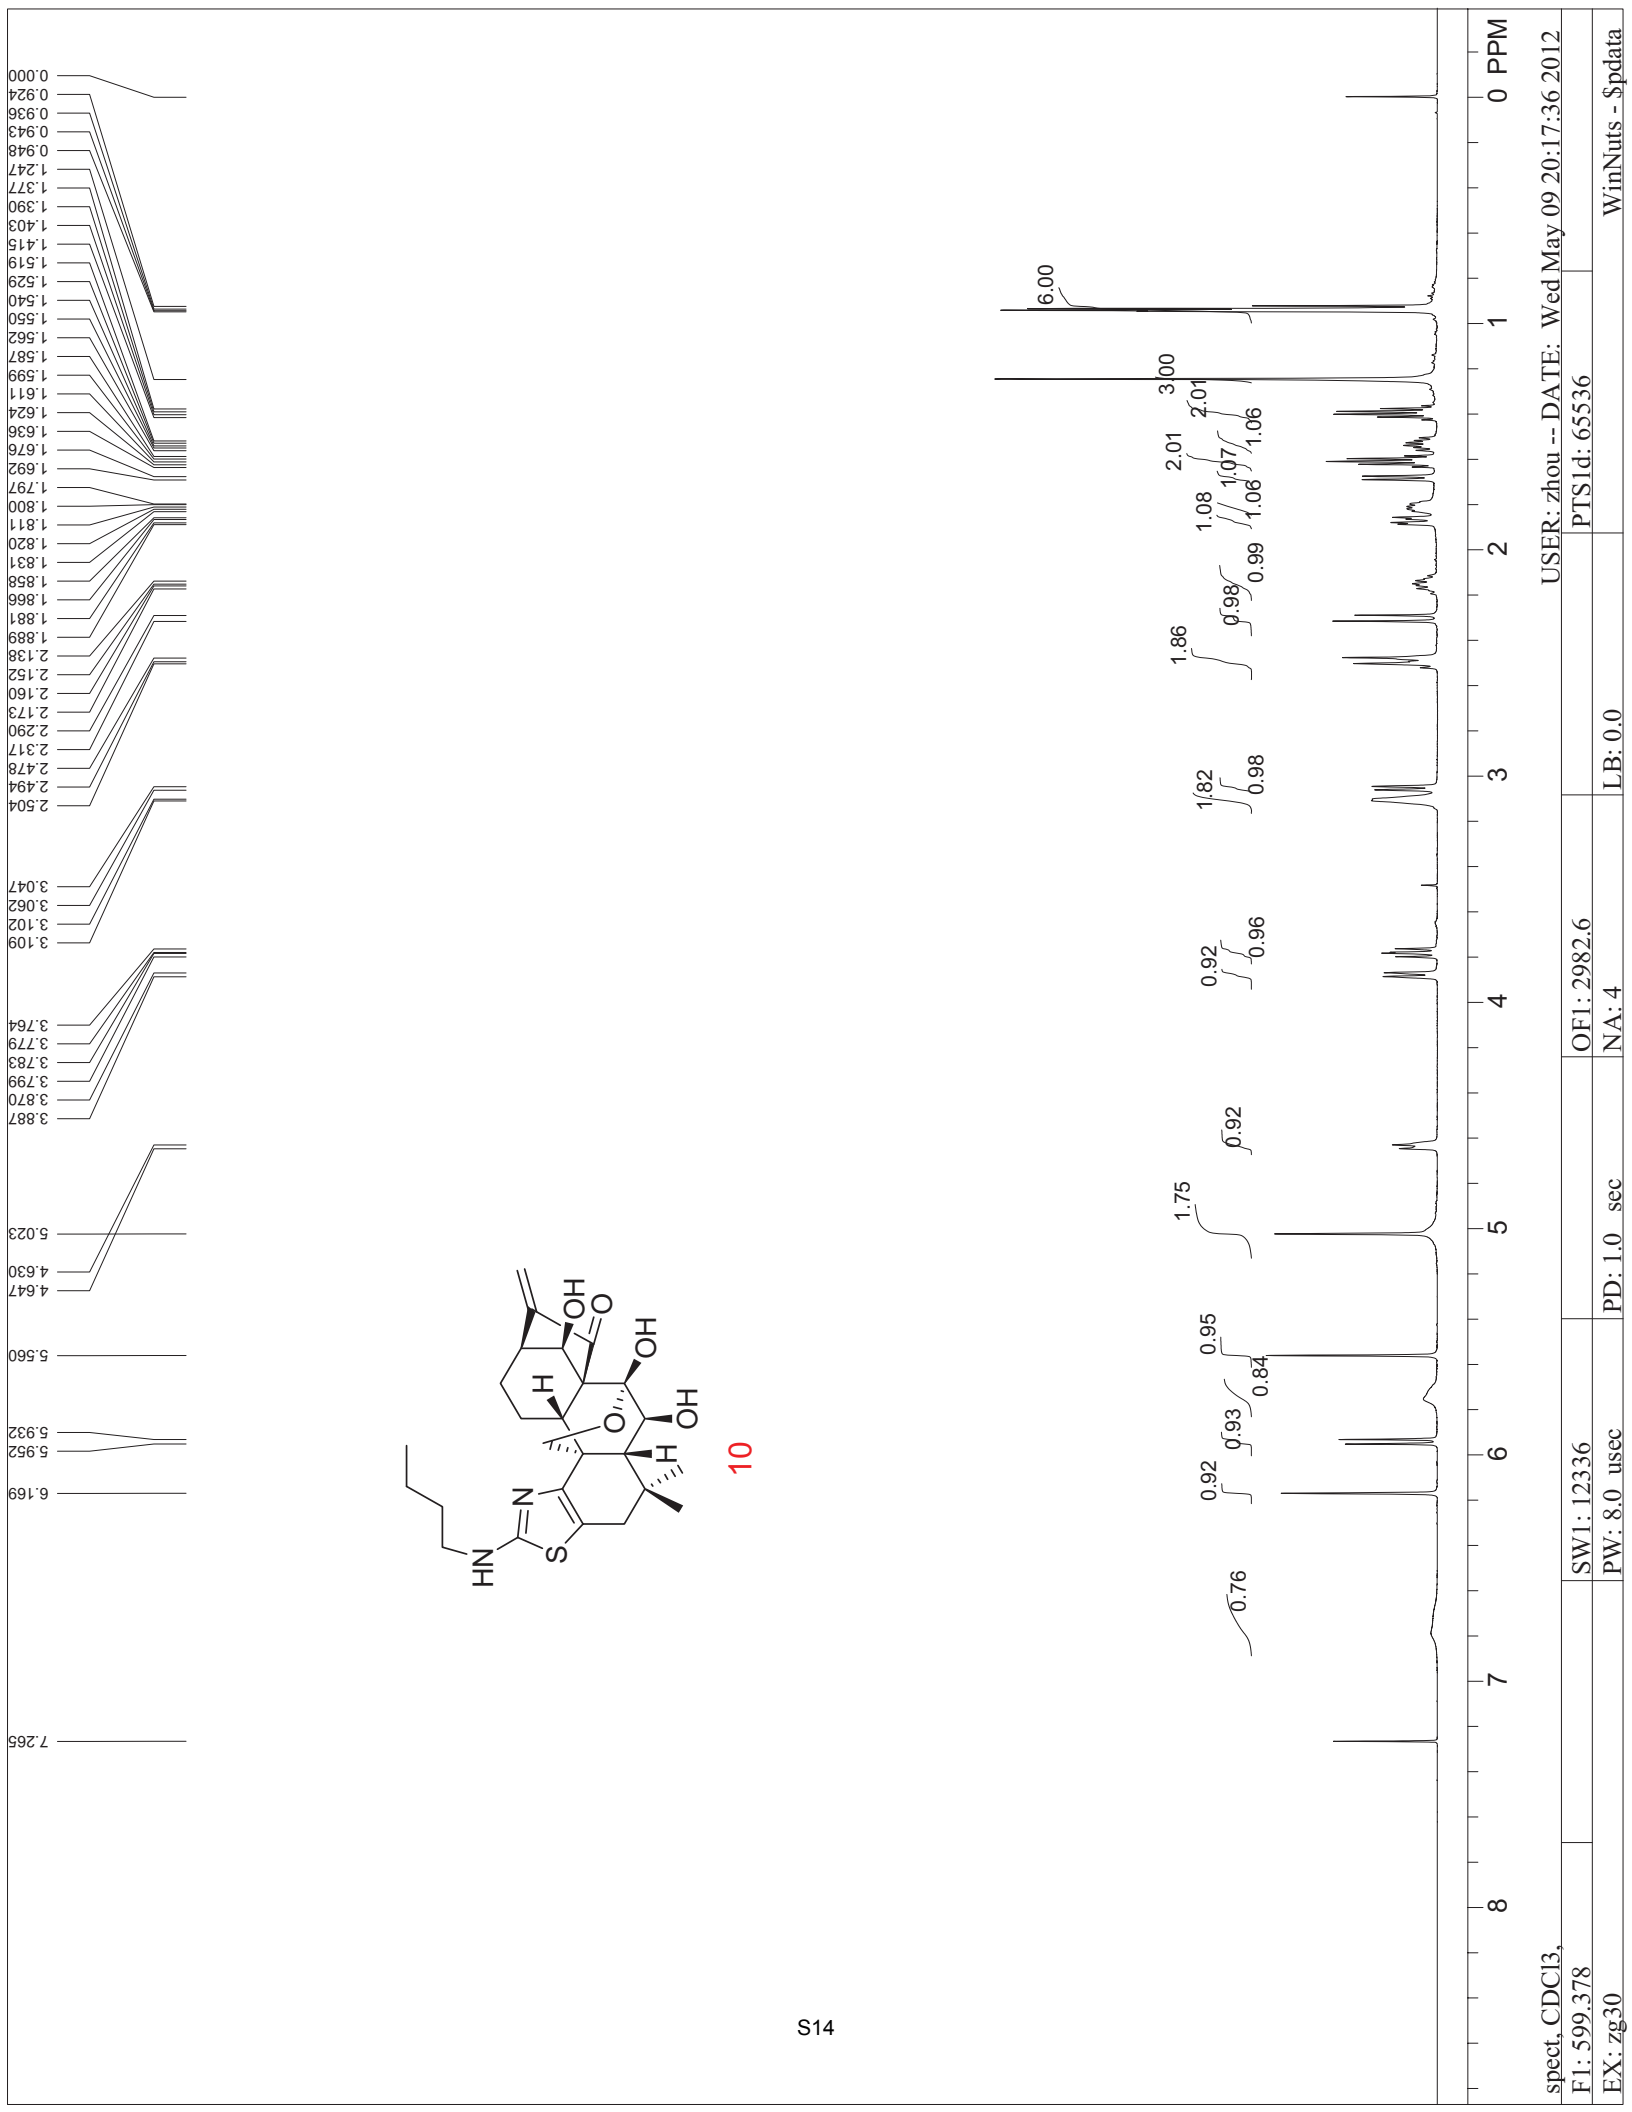

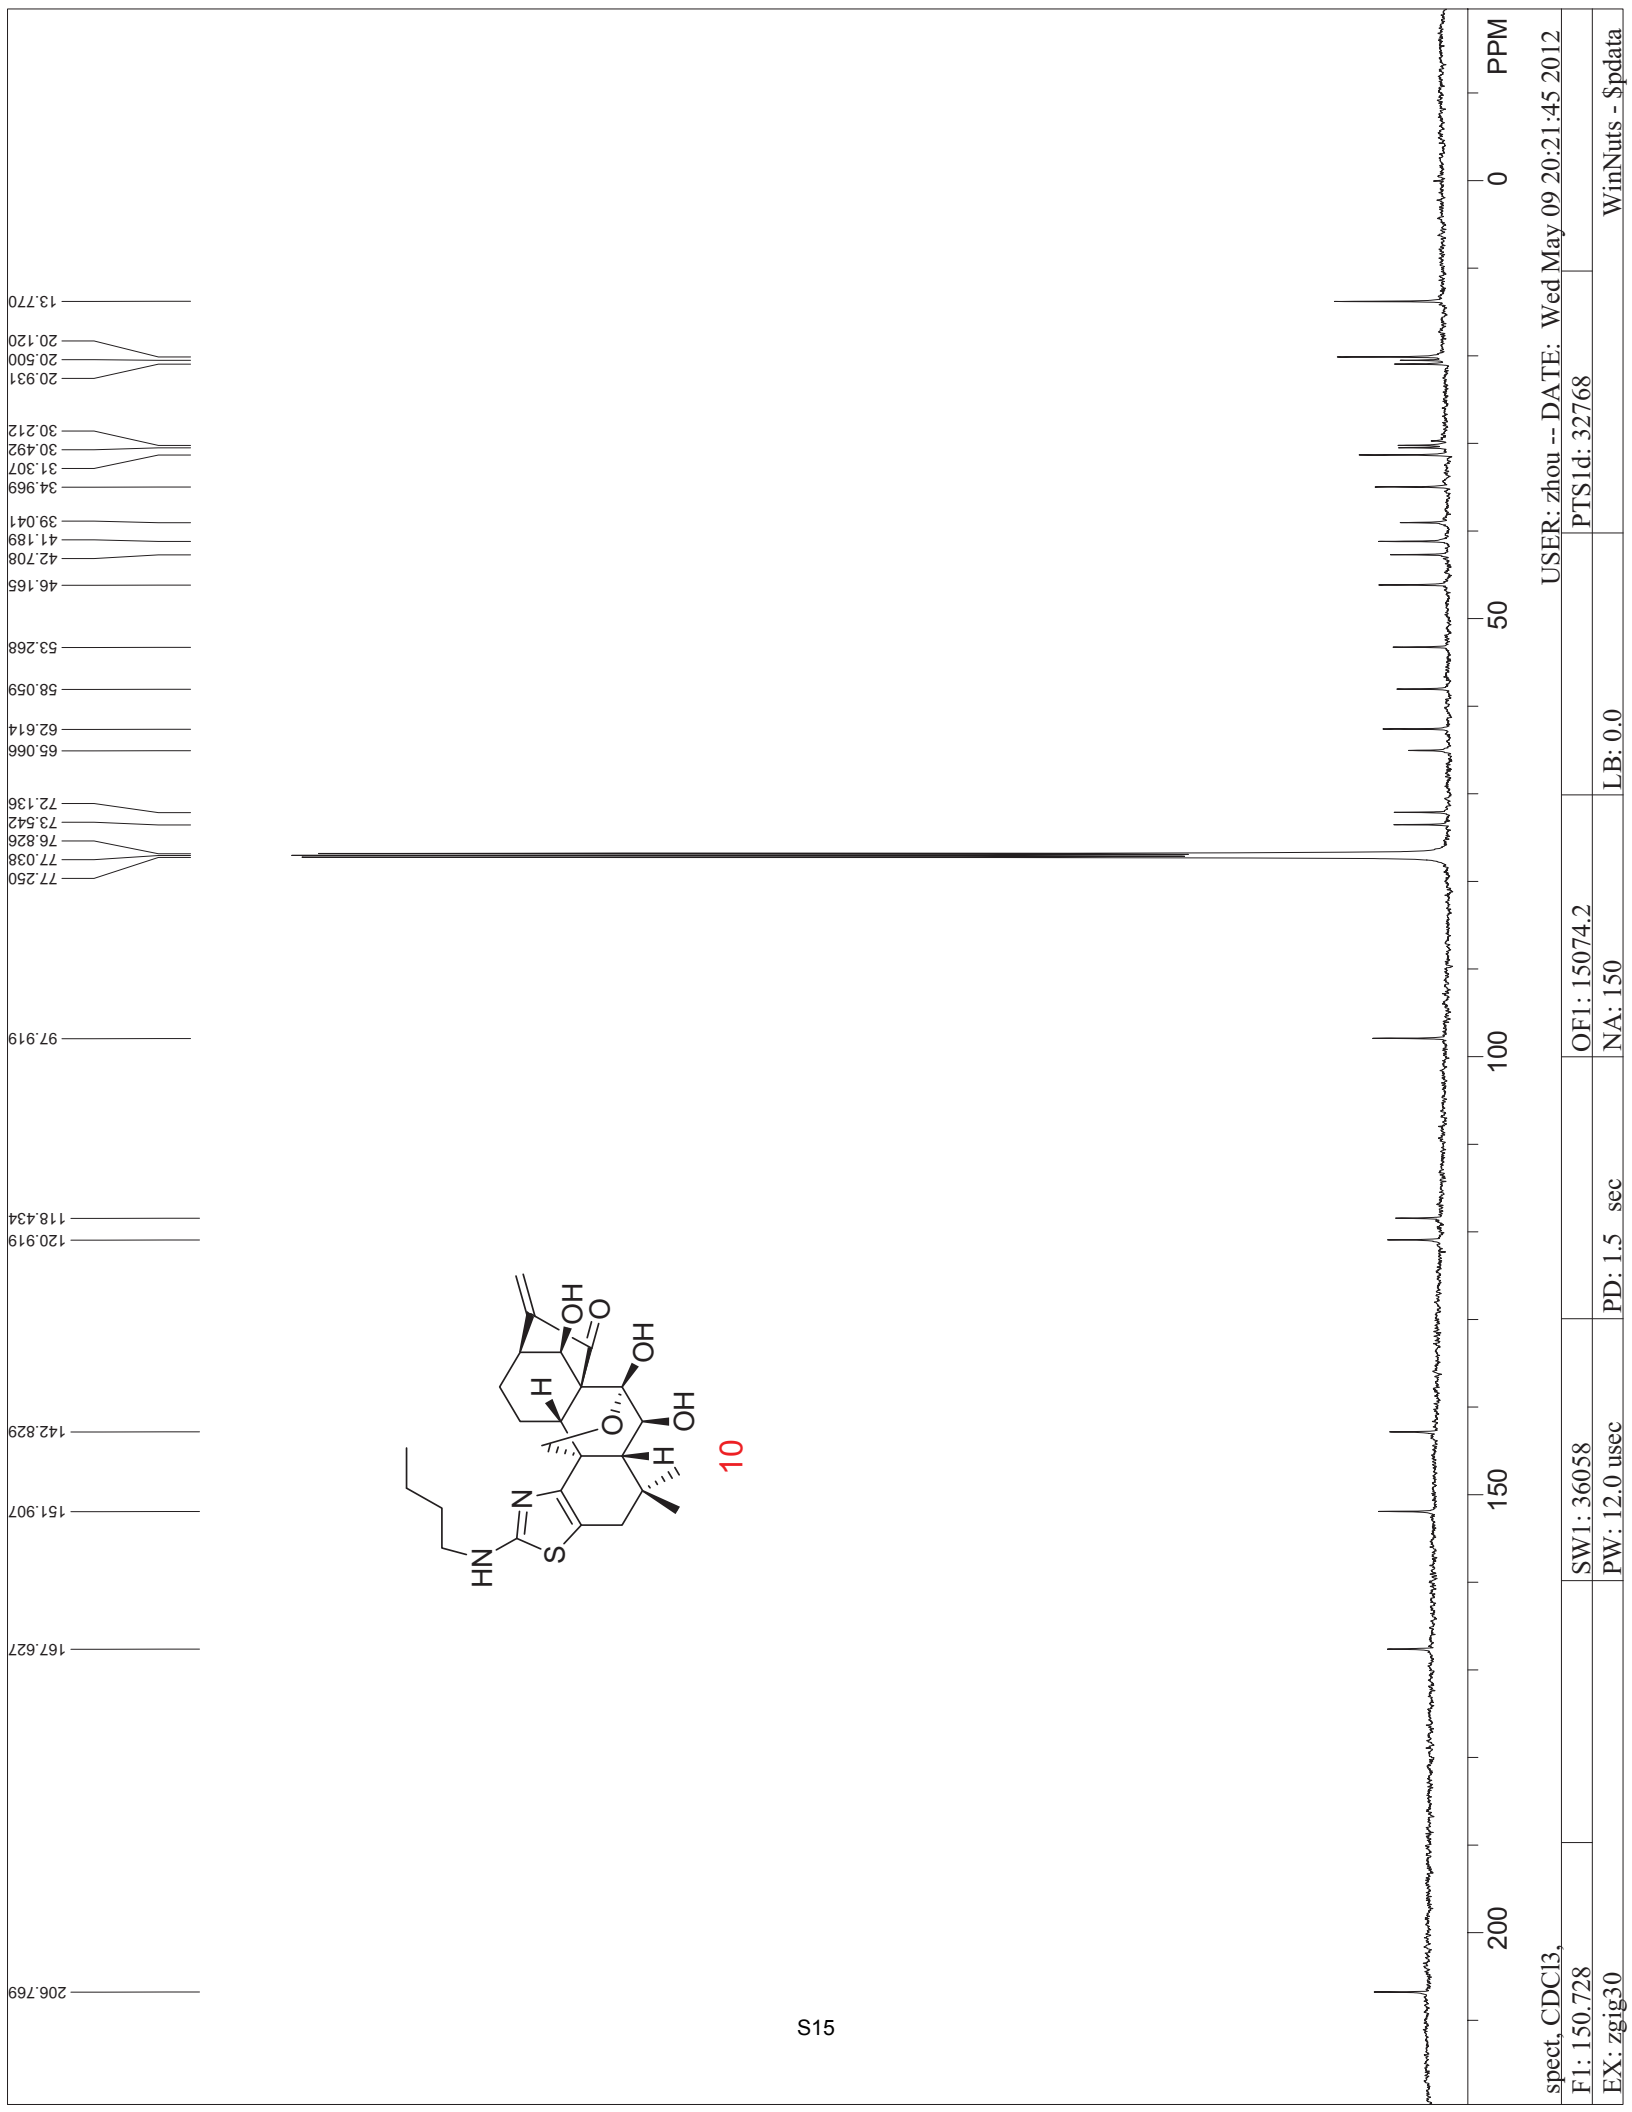

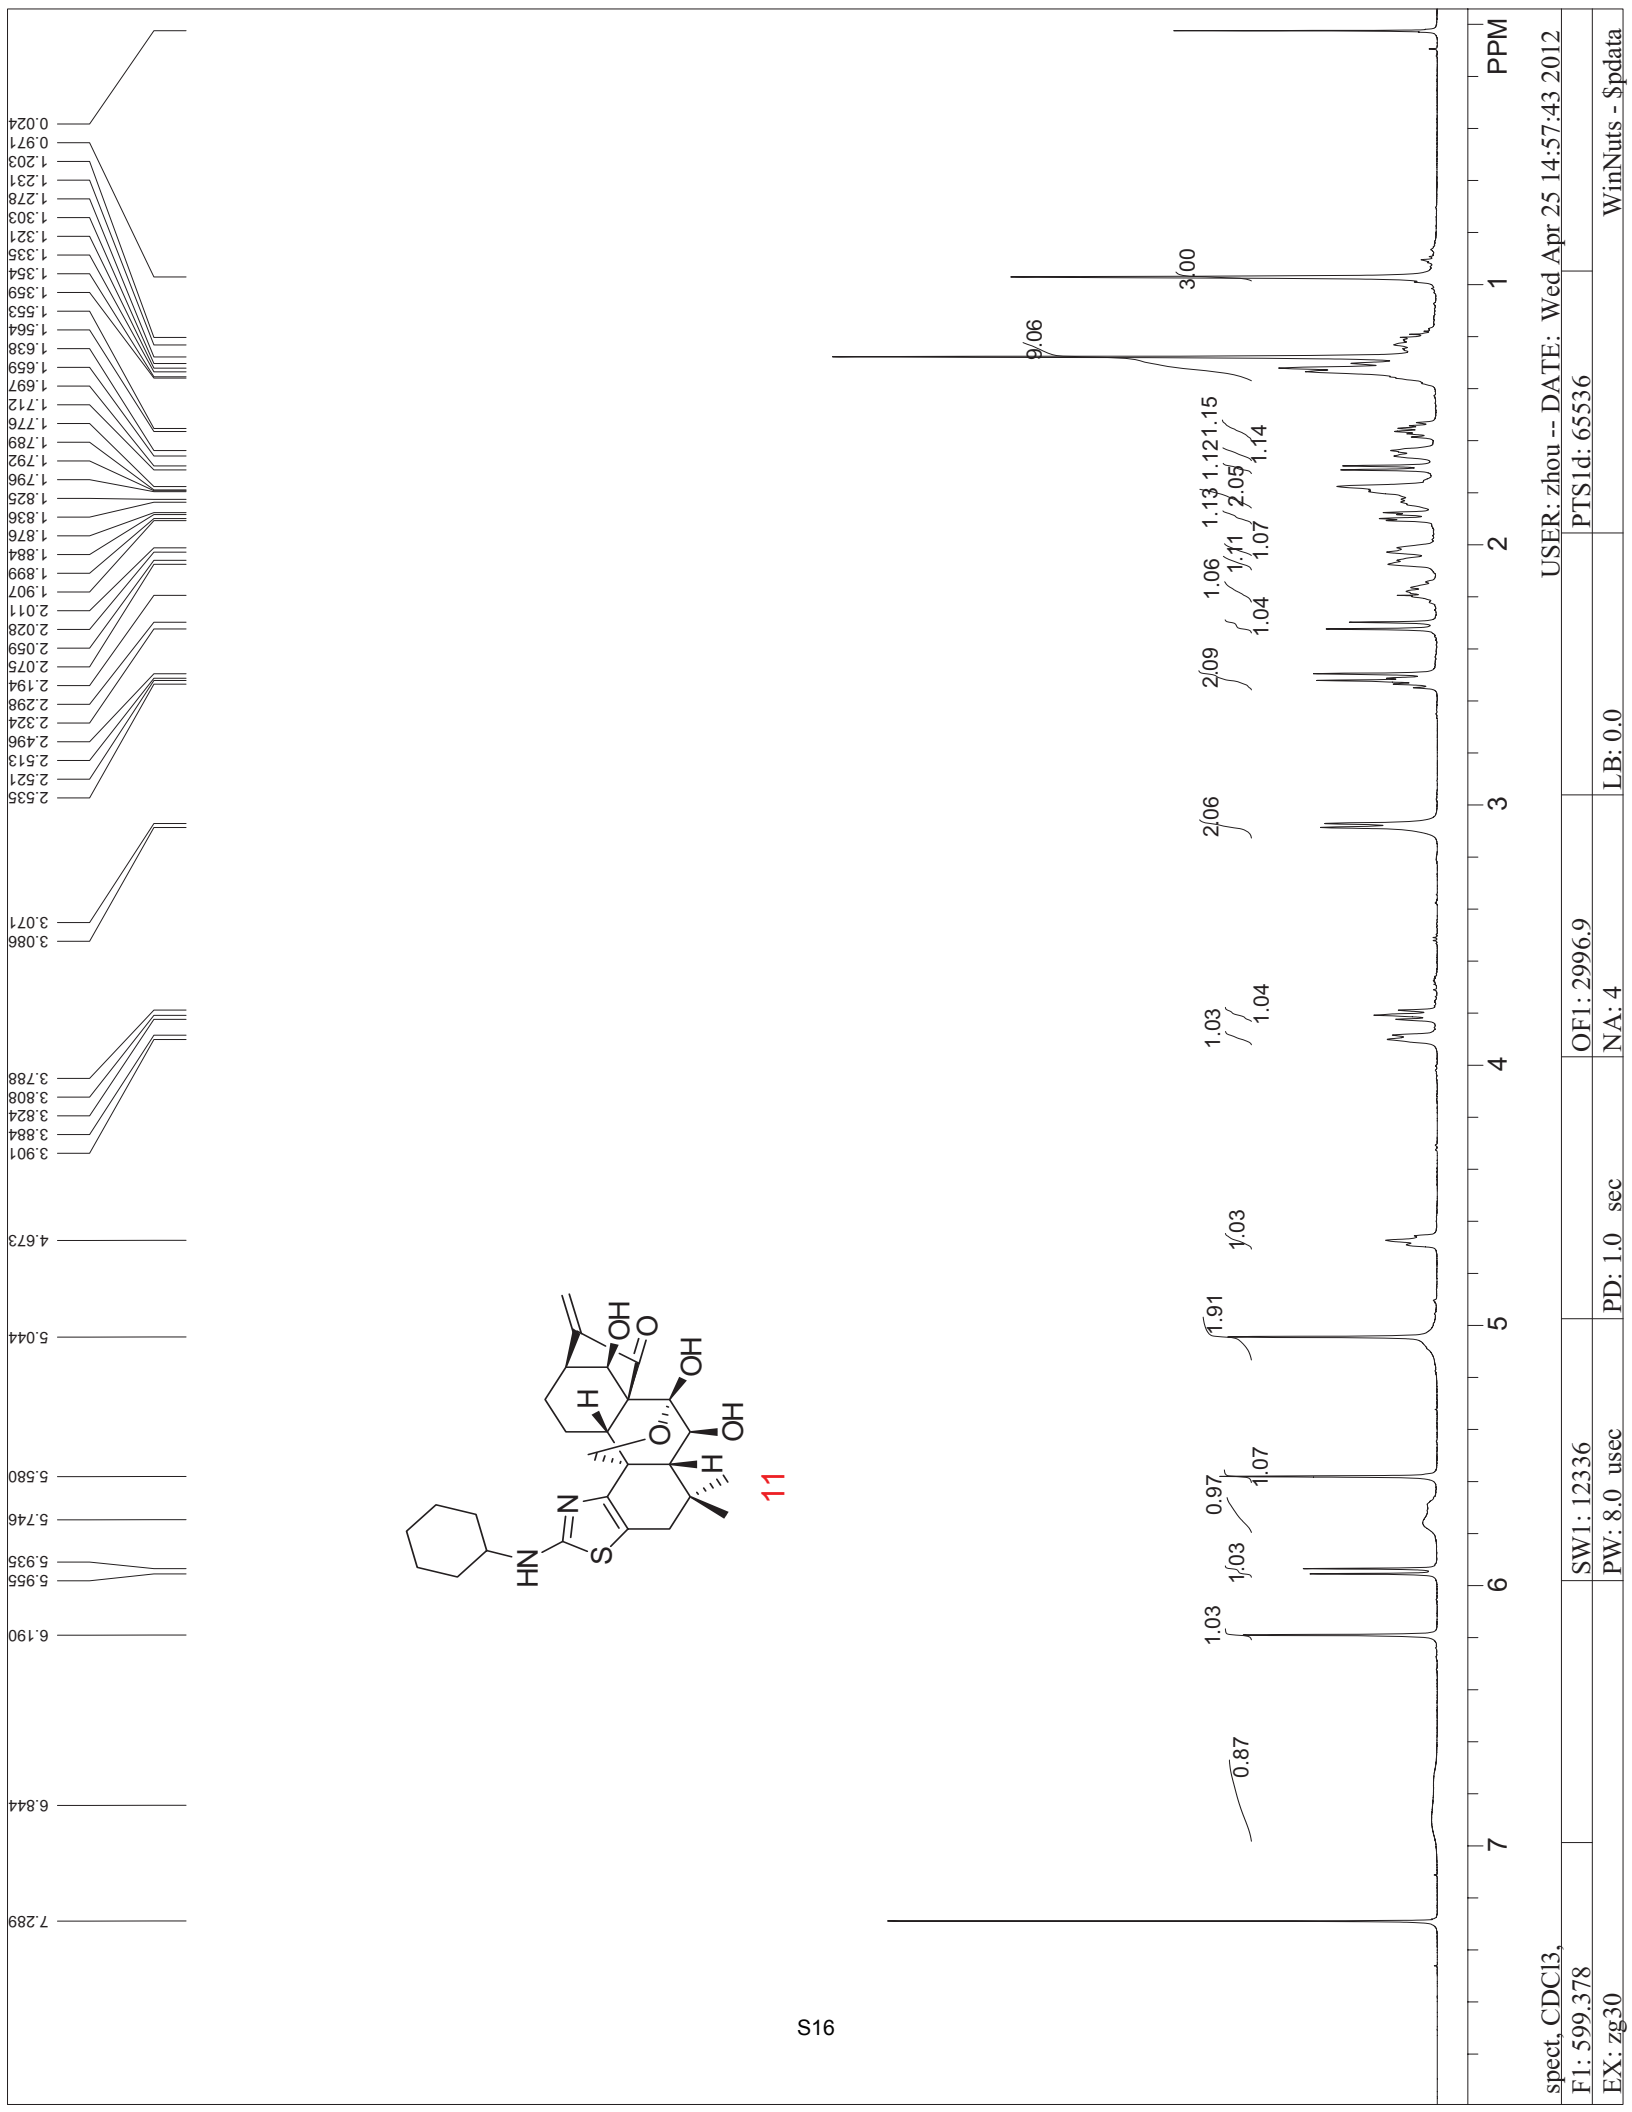

11

spect, CDCl3, USER: zhou -- DATE: Wed Apr 25 14:57:43 2012  
 F1: 599.378 OF1: 2996.9 PTS1d: 65536  
 EX: zg30 PD: 1.0 sec LB: 0.0 WinNuts - \$pdata



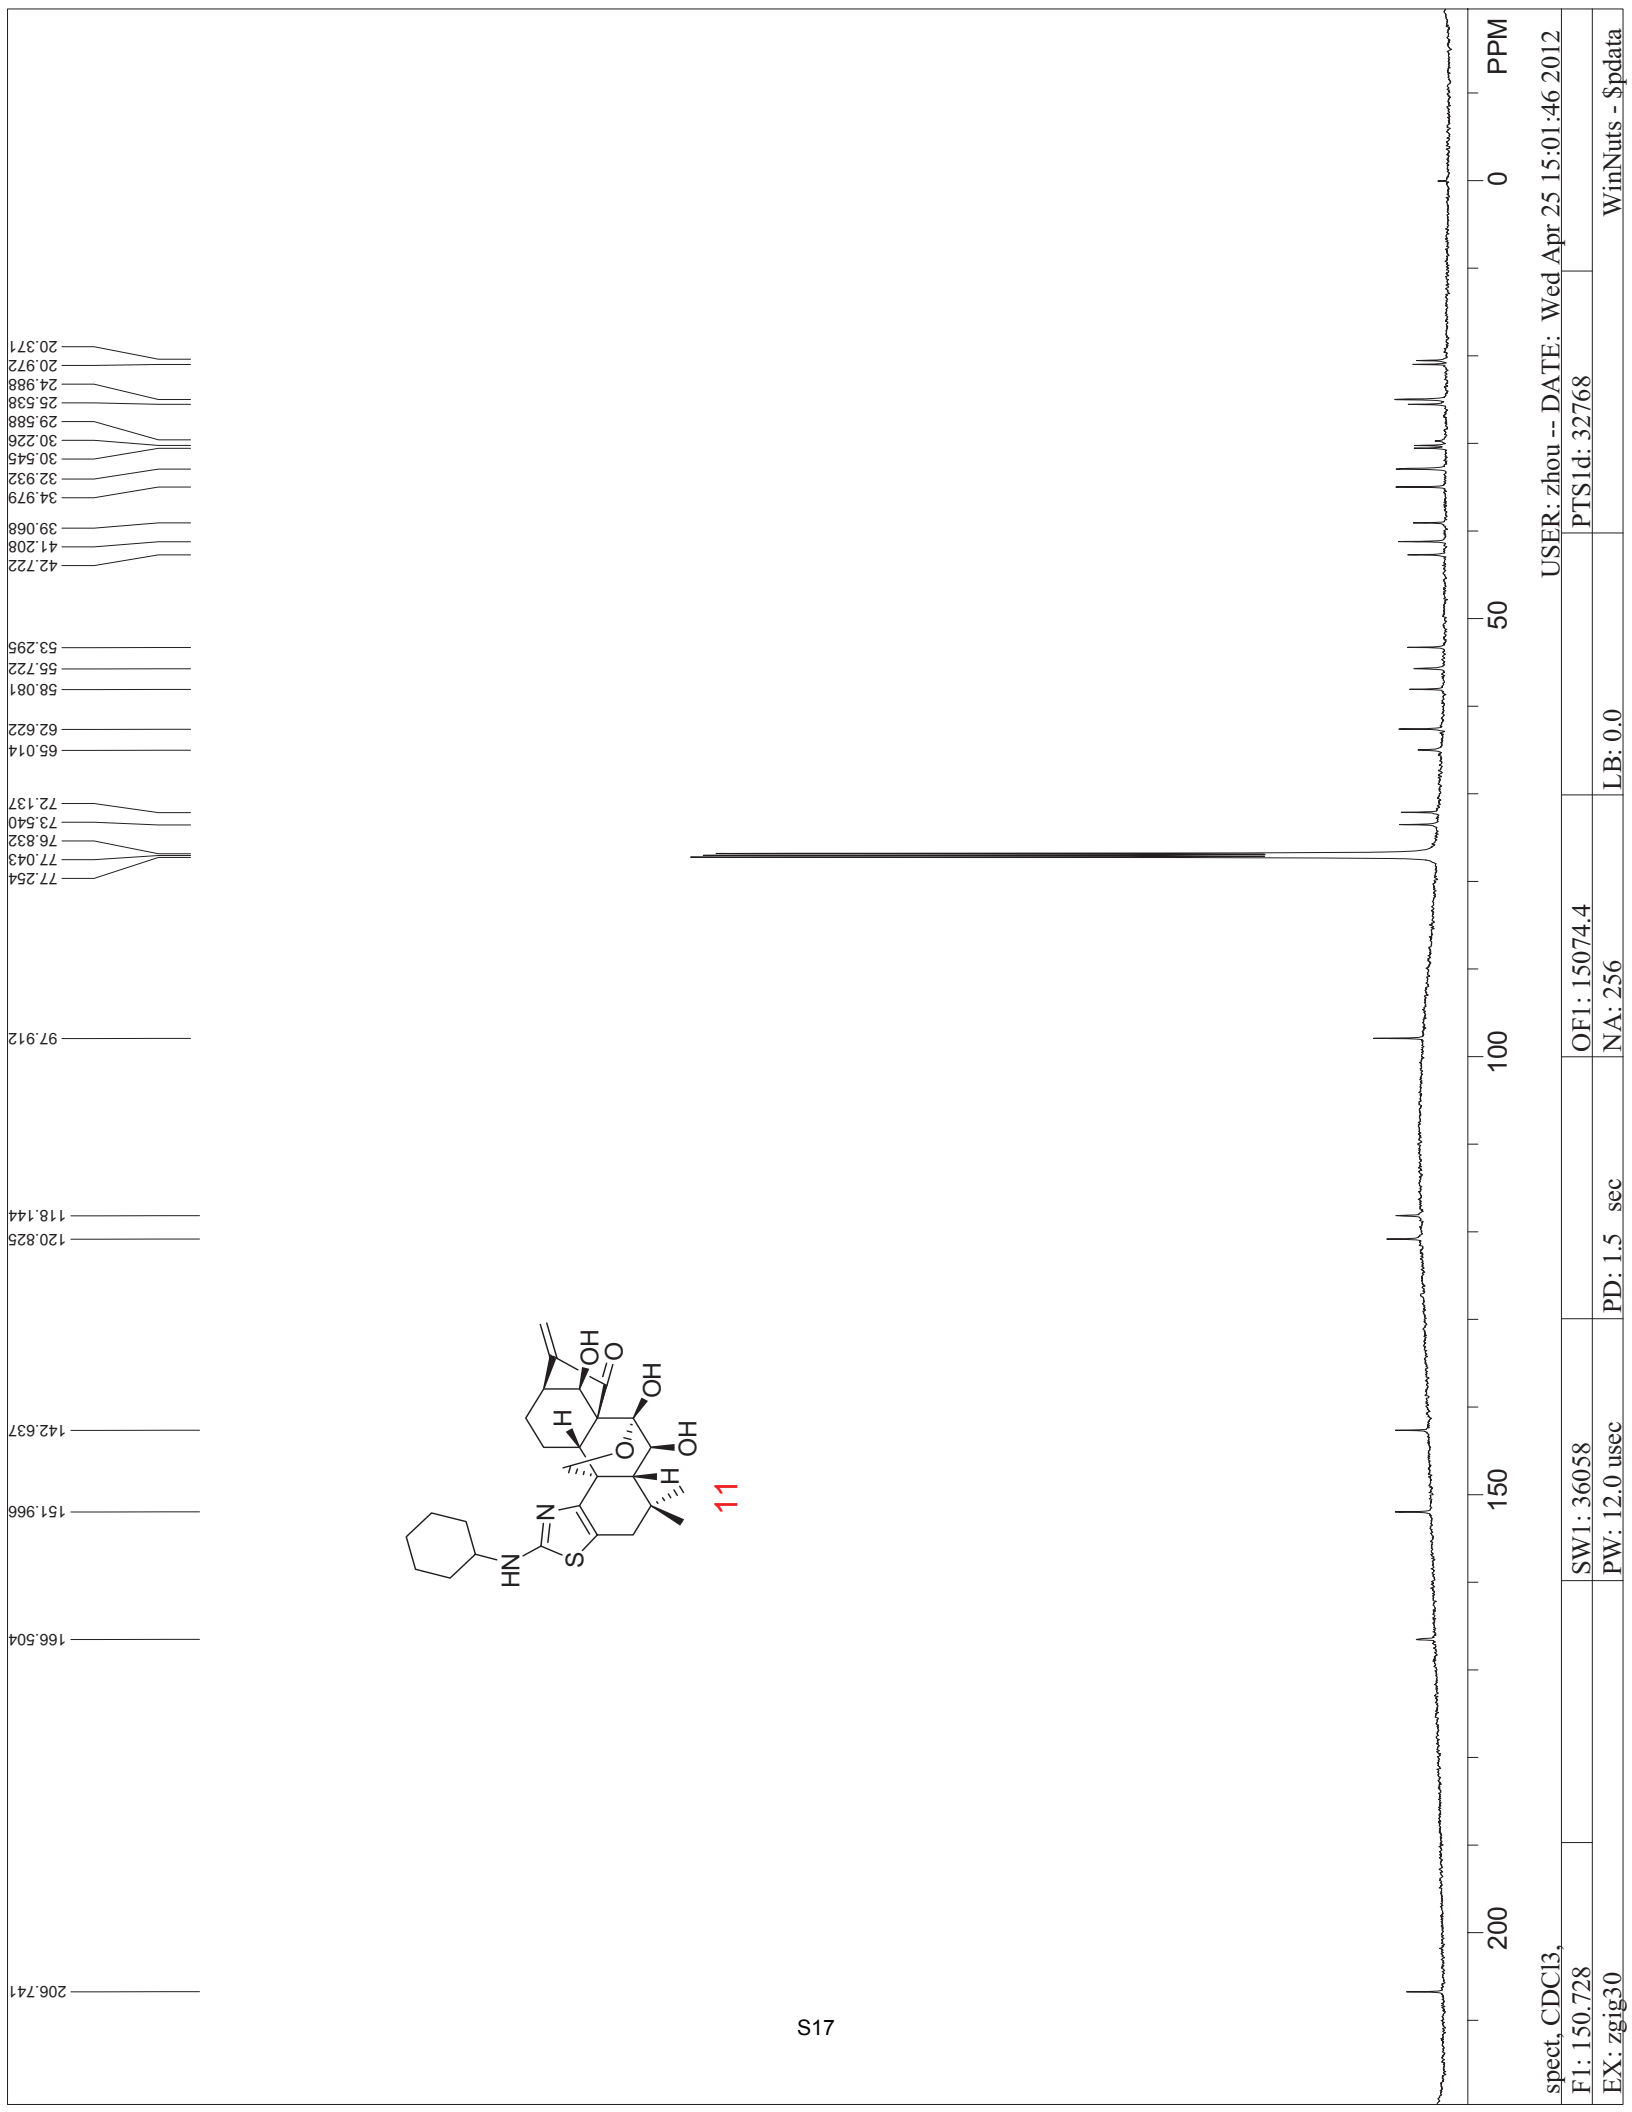

spect, CDC13, USER: zhou -- DATE: Wed Apr 25 15:01:46 2012  
 F1: 150.728 OF1: 15074.4 PTS1d: 32768  
 EX: zgig30 PD: 1.5 sec NA: 256 LB: 0.0  
 WinNuts - \$pdata

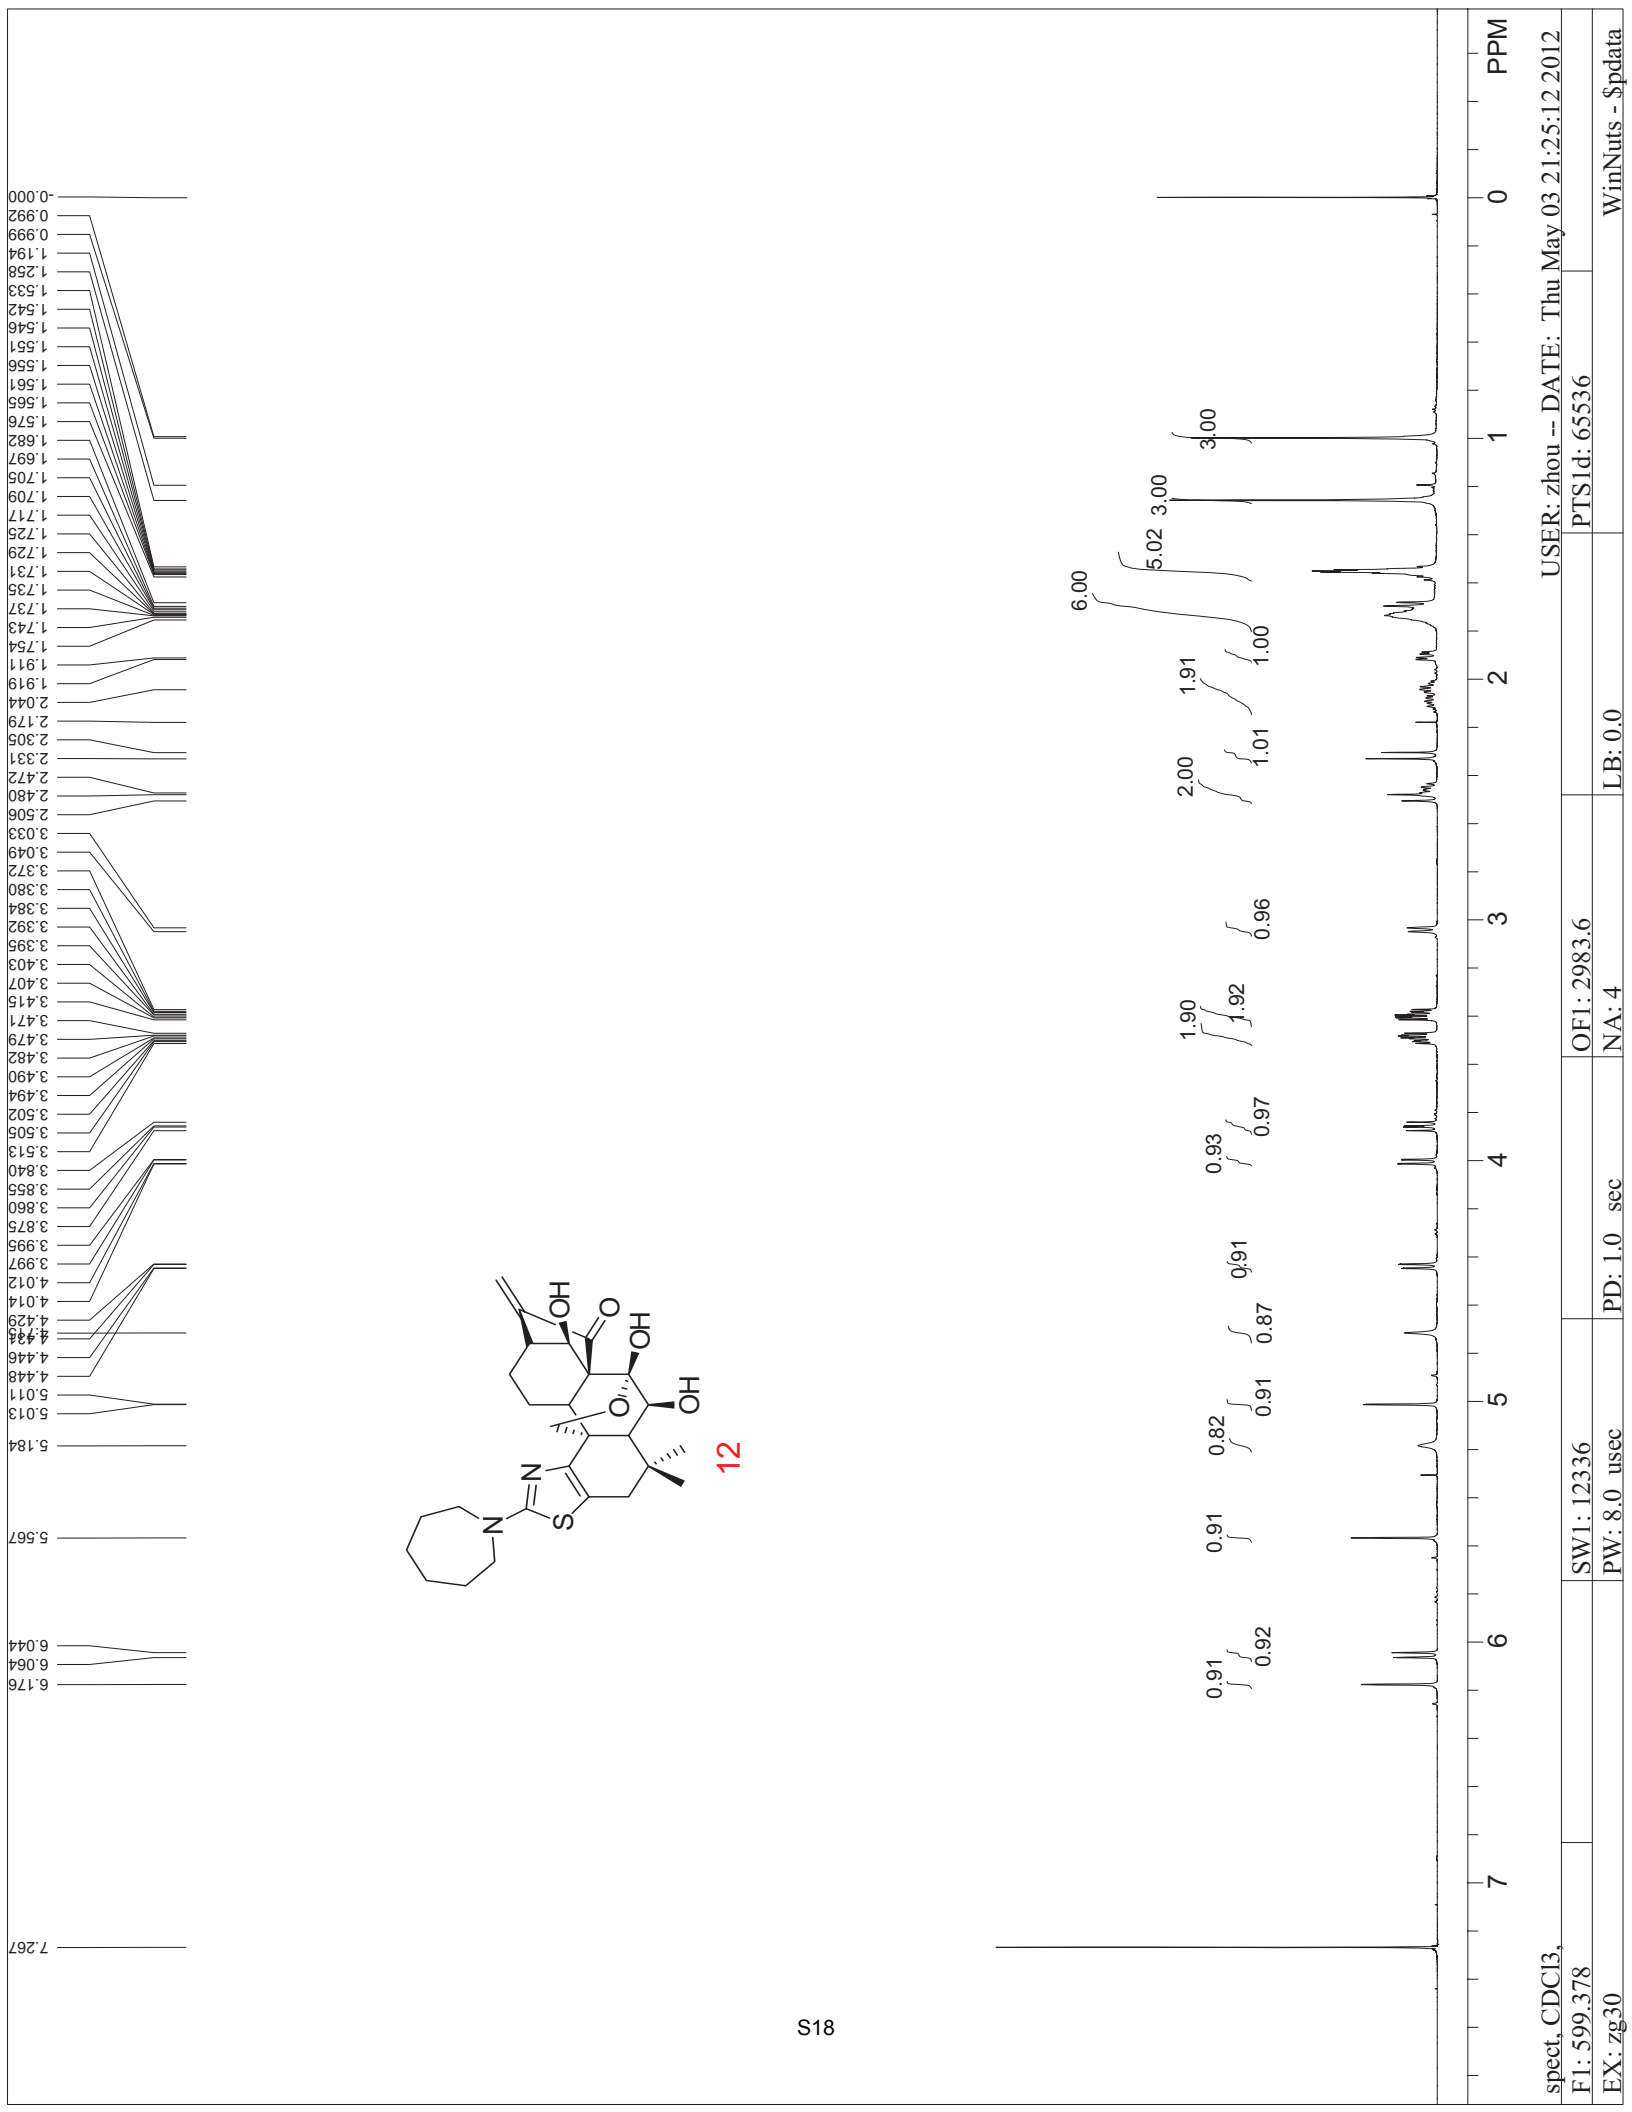

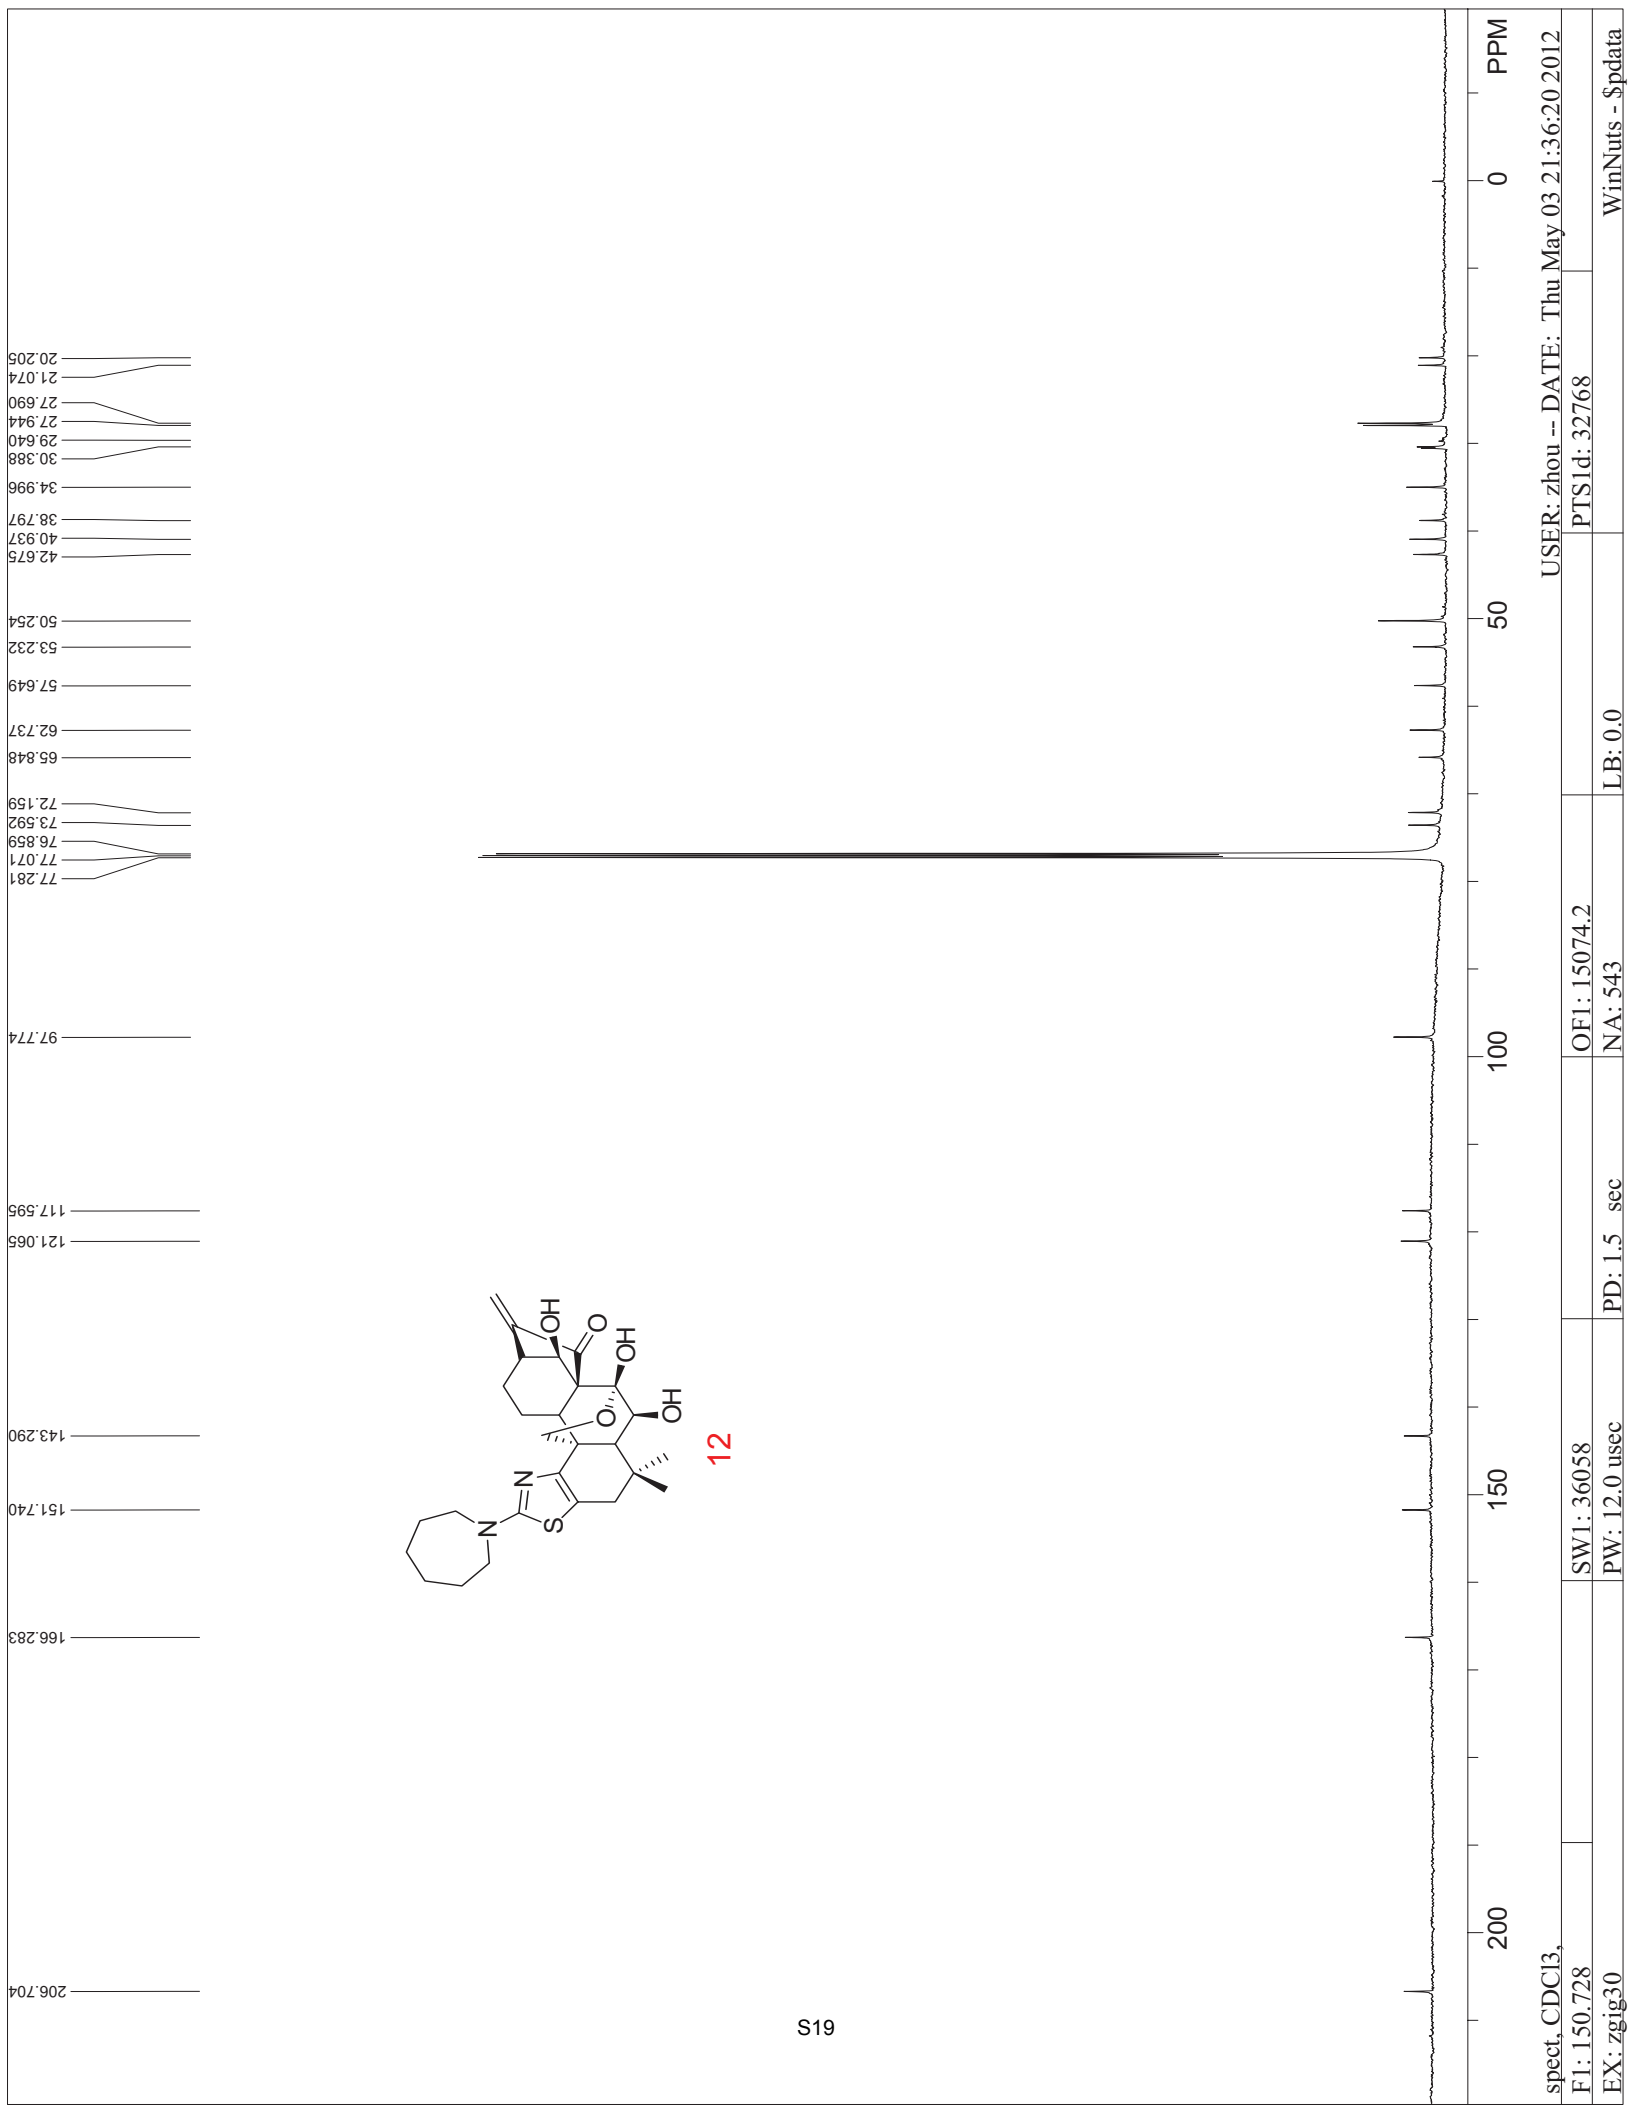

spect, CDCI3, USER: zhou -- DATE: Thu May 03 21:36:20 2012  
 F1: 150.728 PTS1d: 32768  
 EX: zgig30 LB: 0.0  
 OF1: 15074.2  
 NA: 543  
 PD: 1.5 sec  
 SW1: 36058  
 PW: 12.0 usec  
 WinNuts - \$pdata

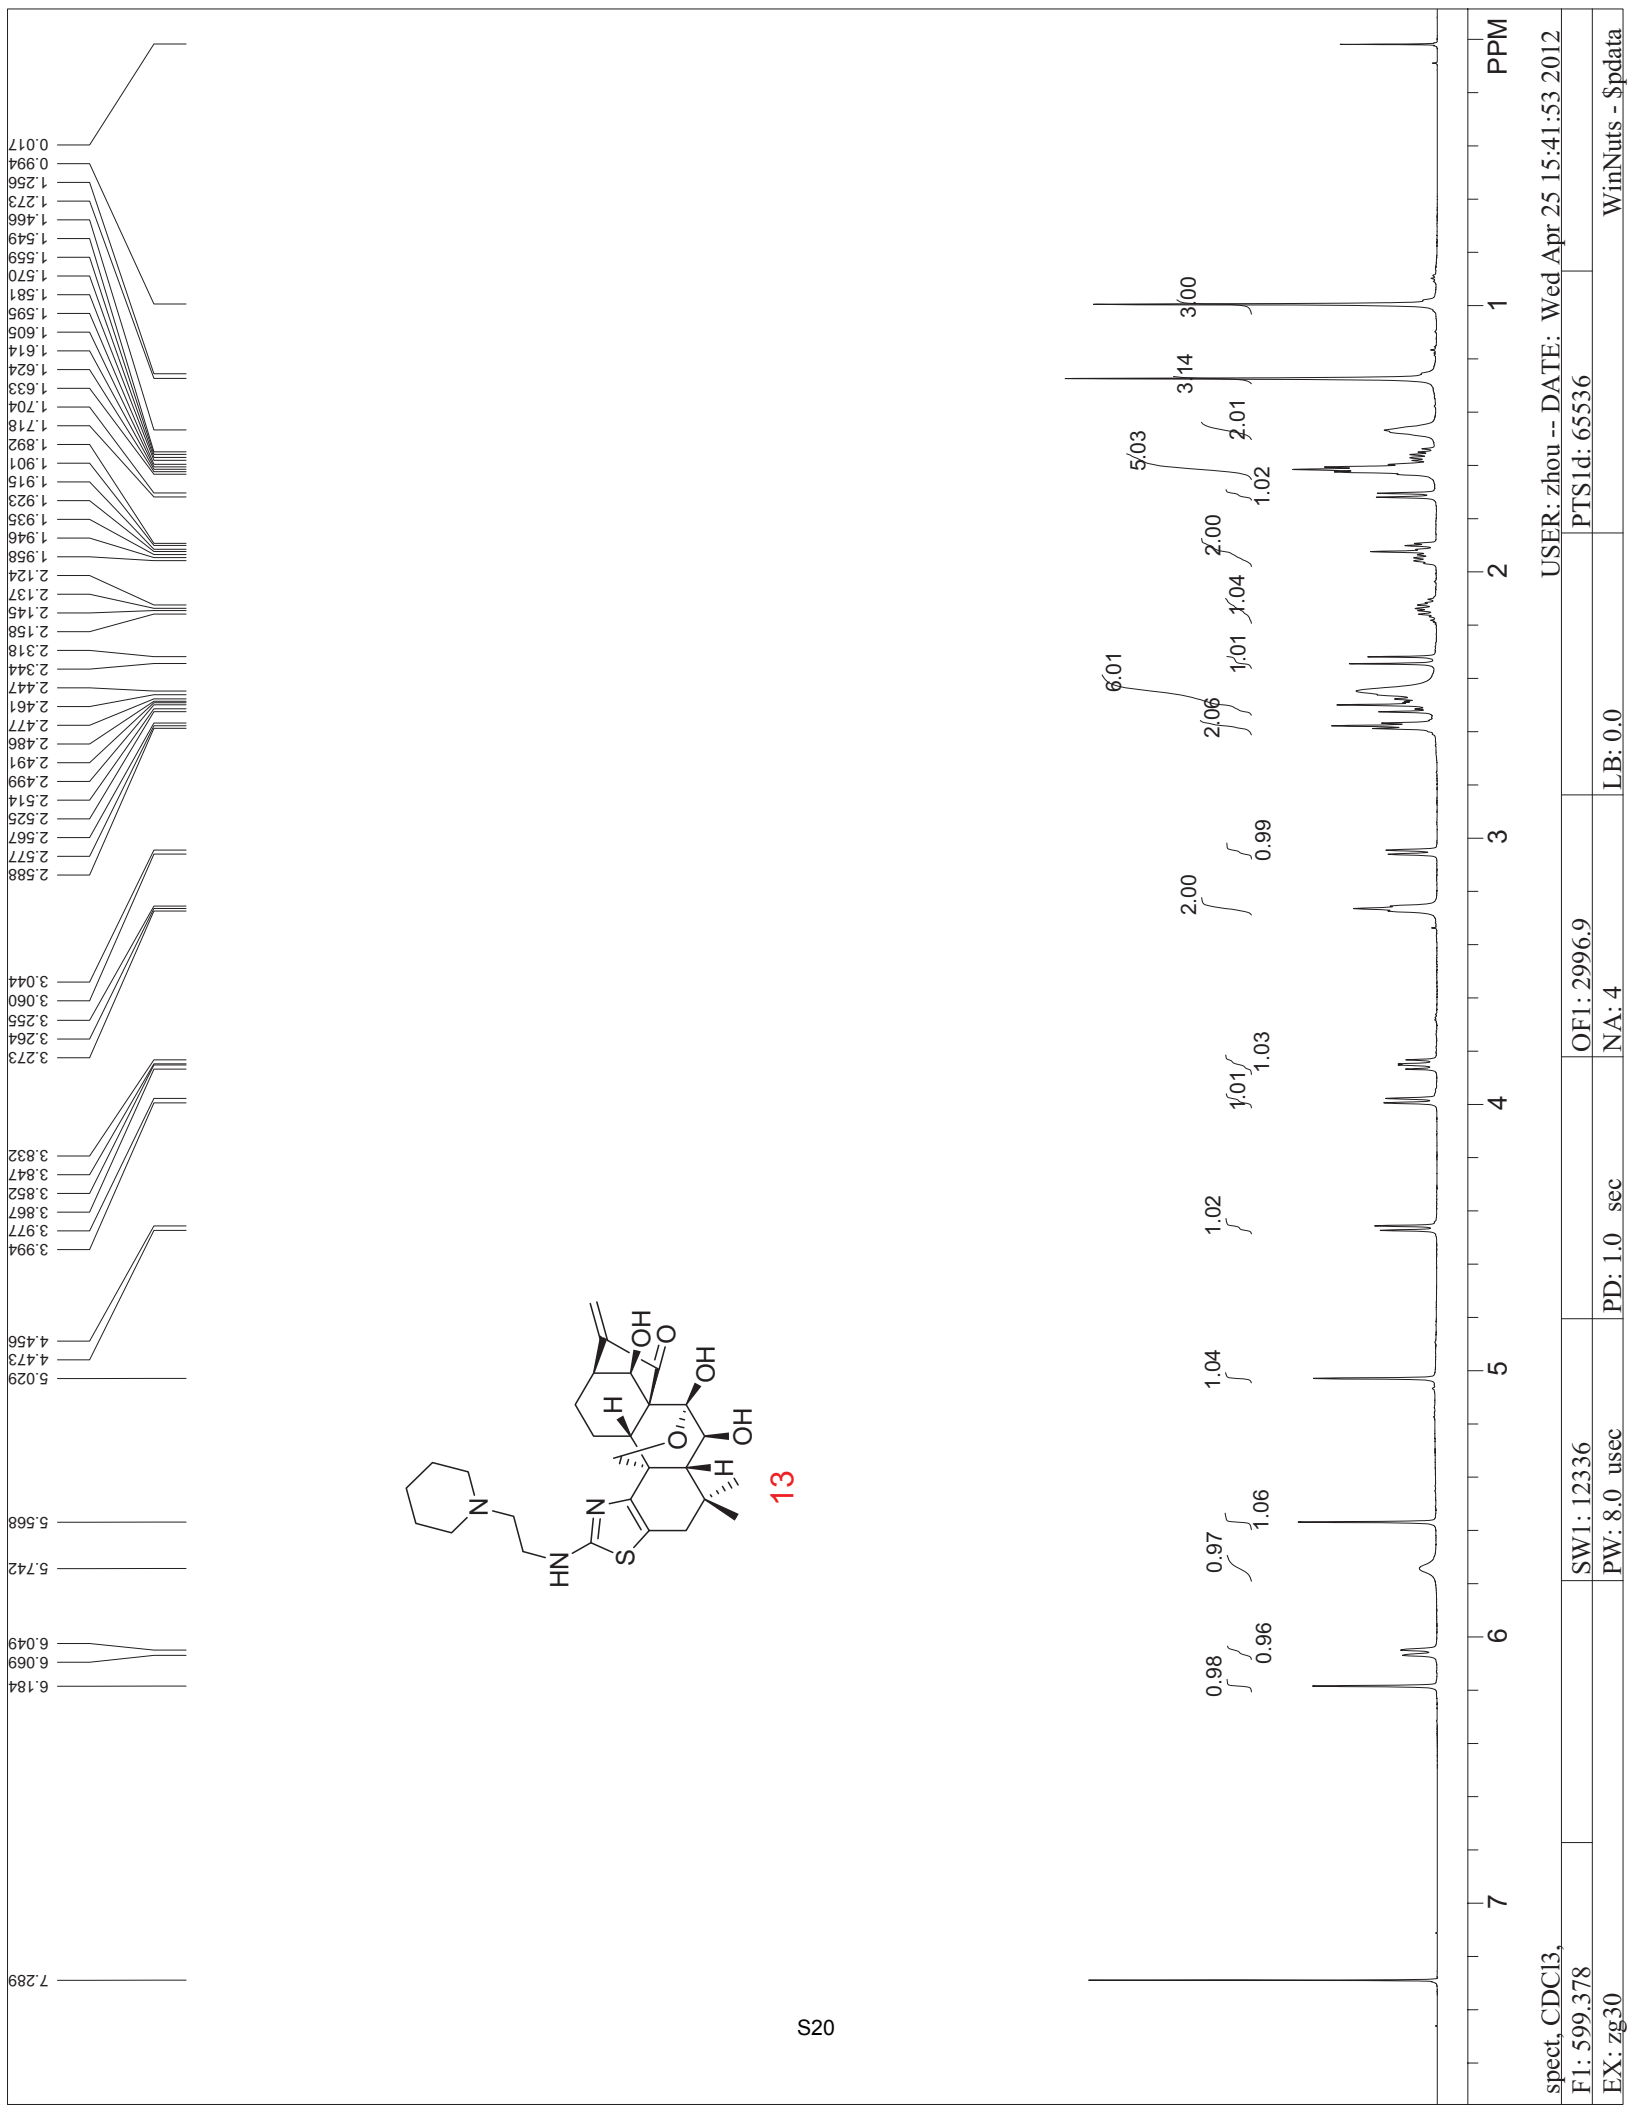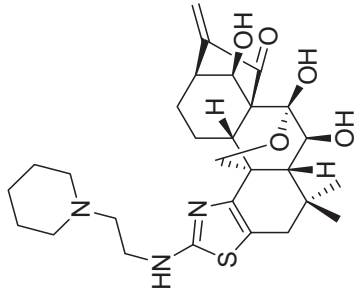

13

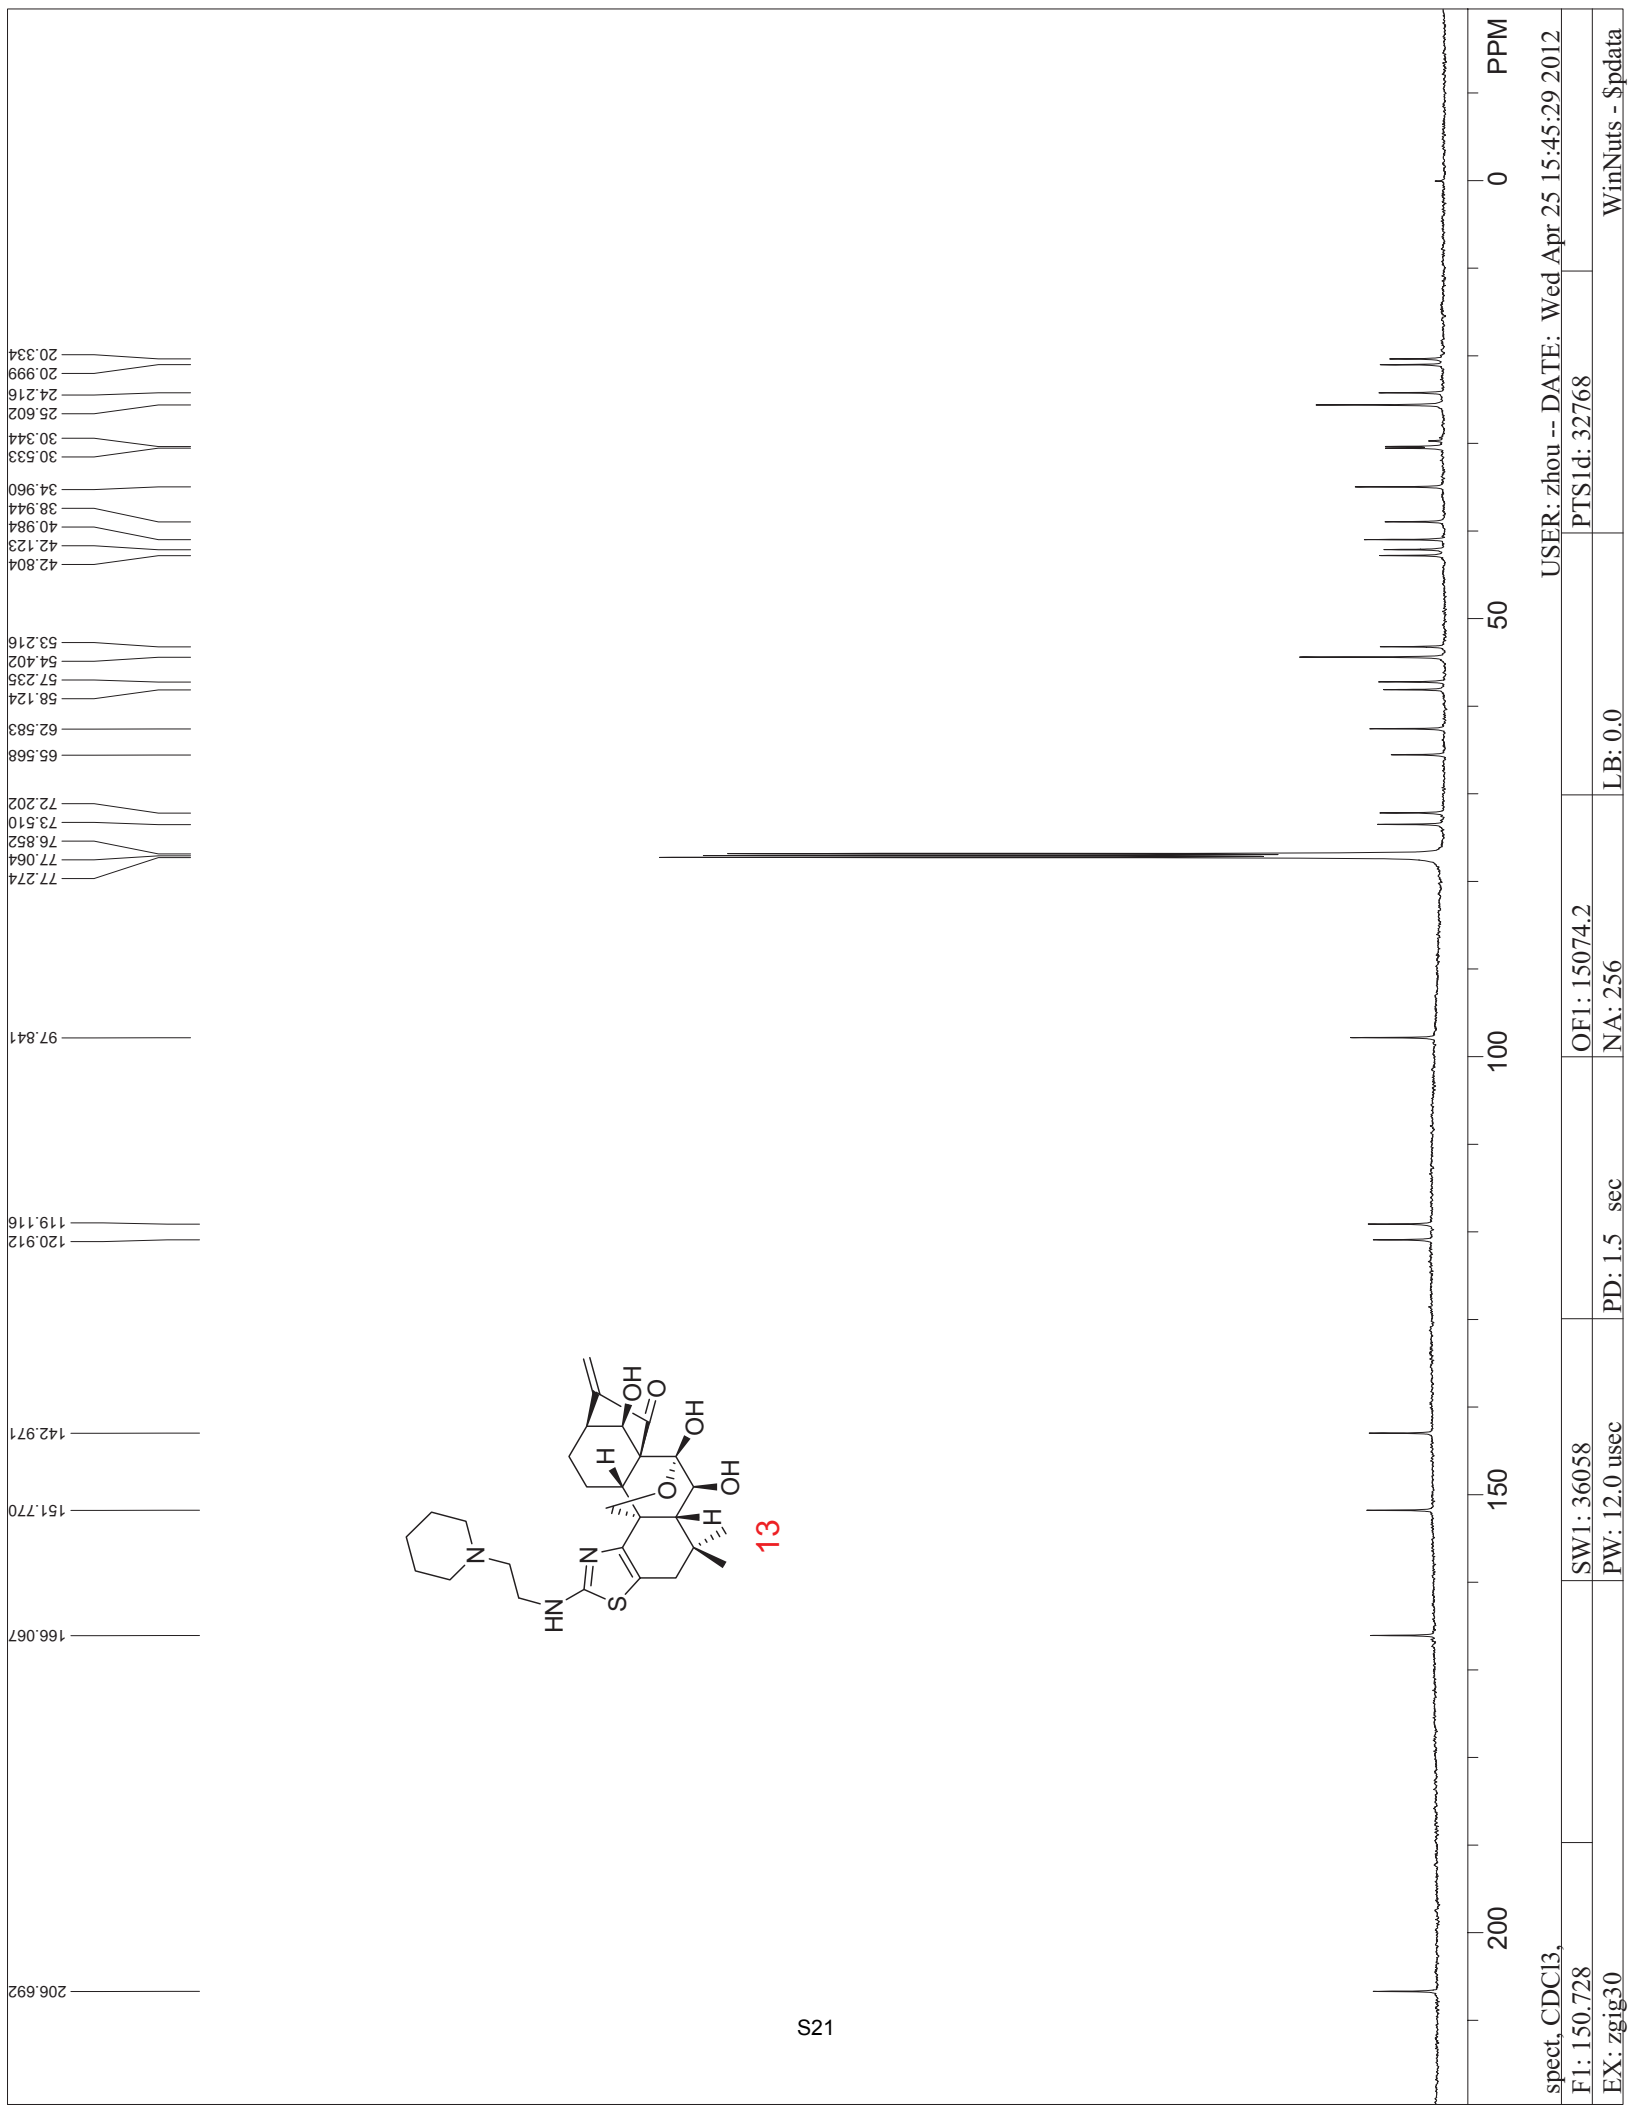

spect, CDC13, USER: zhou -- DATE: Wed Apr 25 15:45:29 2012  
 F1: 150.728 PTS1d: 32768  
 EX: zgig30 LB: 0.0 OF1: 15074.2 NA: 256  
 PD: 1.5 sec  
 WinNuts - \$pdata

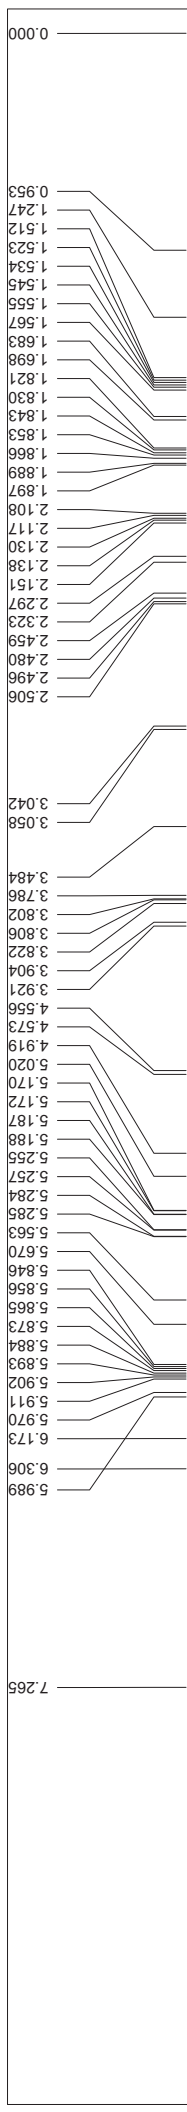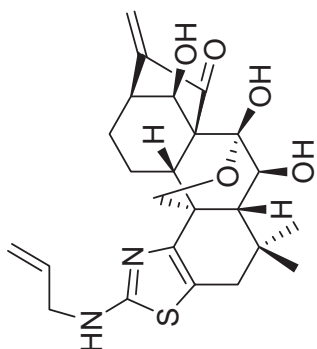

14

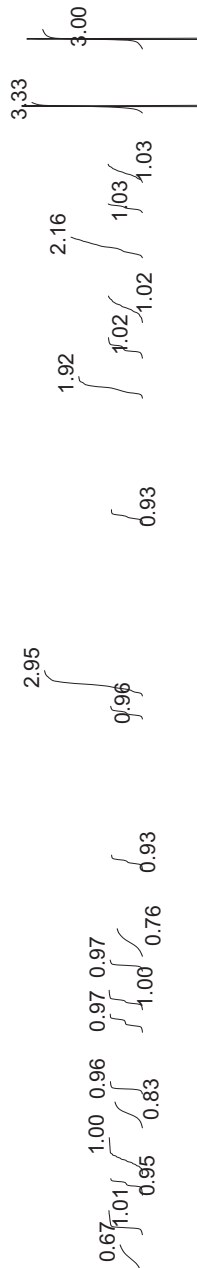

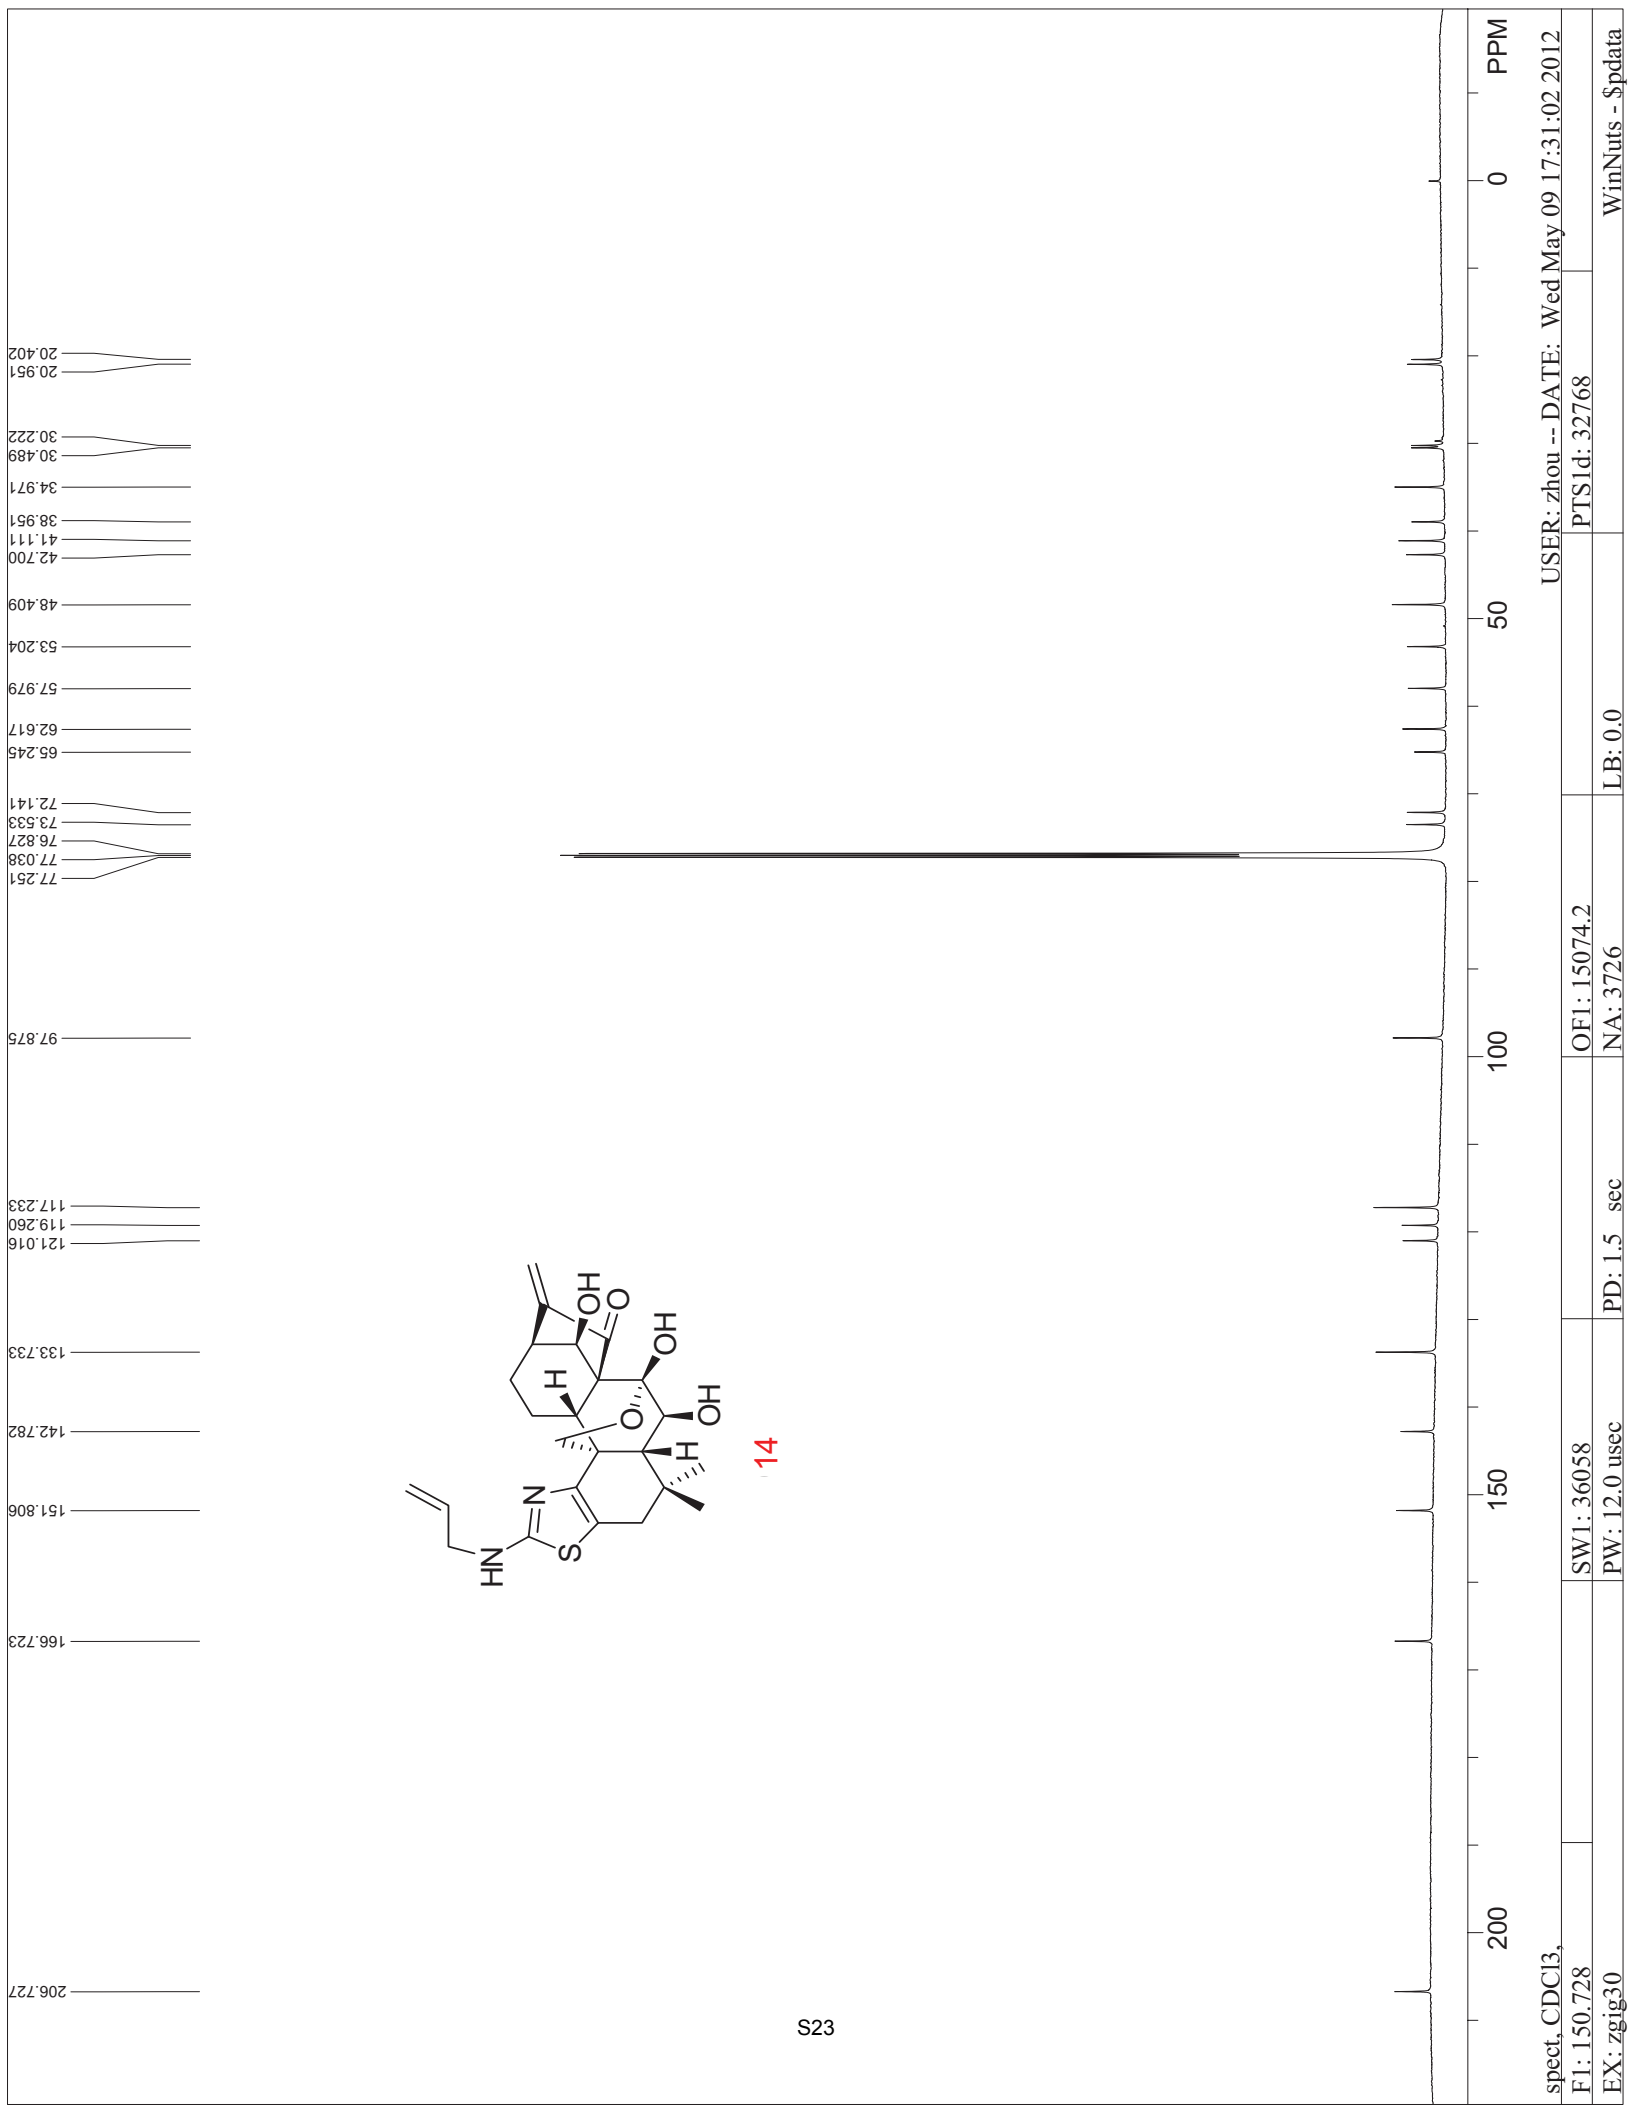

spect, CDCI3, USER: zhou -- DATE: Wed May 09 17:31:02 2012  
 F1: 150.728 OF1: 15074.2 PTS1d: 32768  
 EX: zgig30 PW: 12.0 usec PD: 1.5 sec NA: 3726 LB: 0.0  
 WinNuts - \$pdata

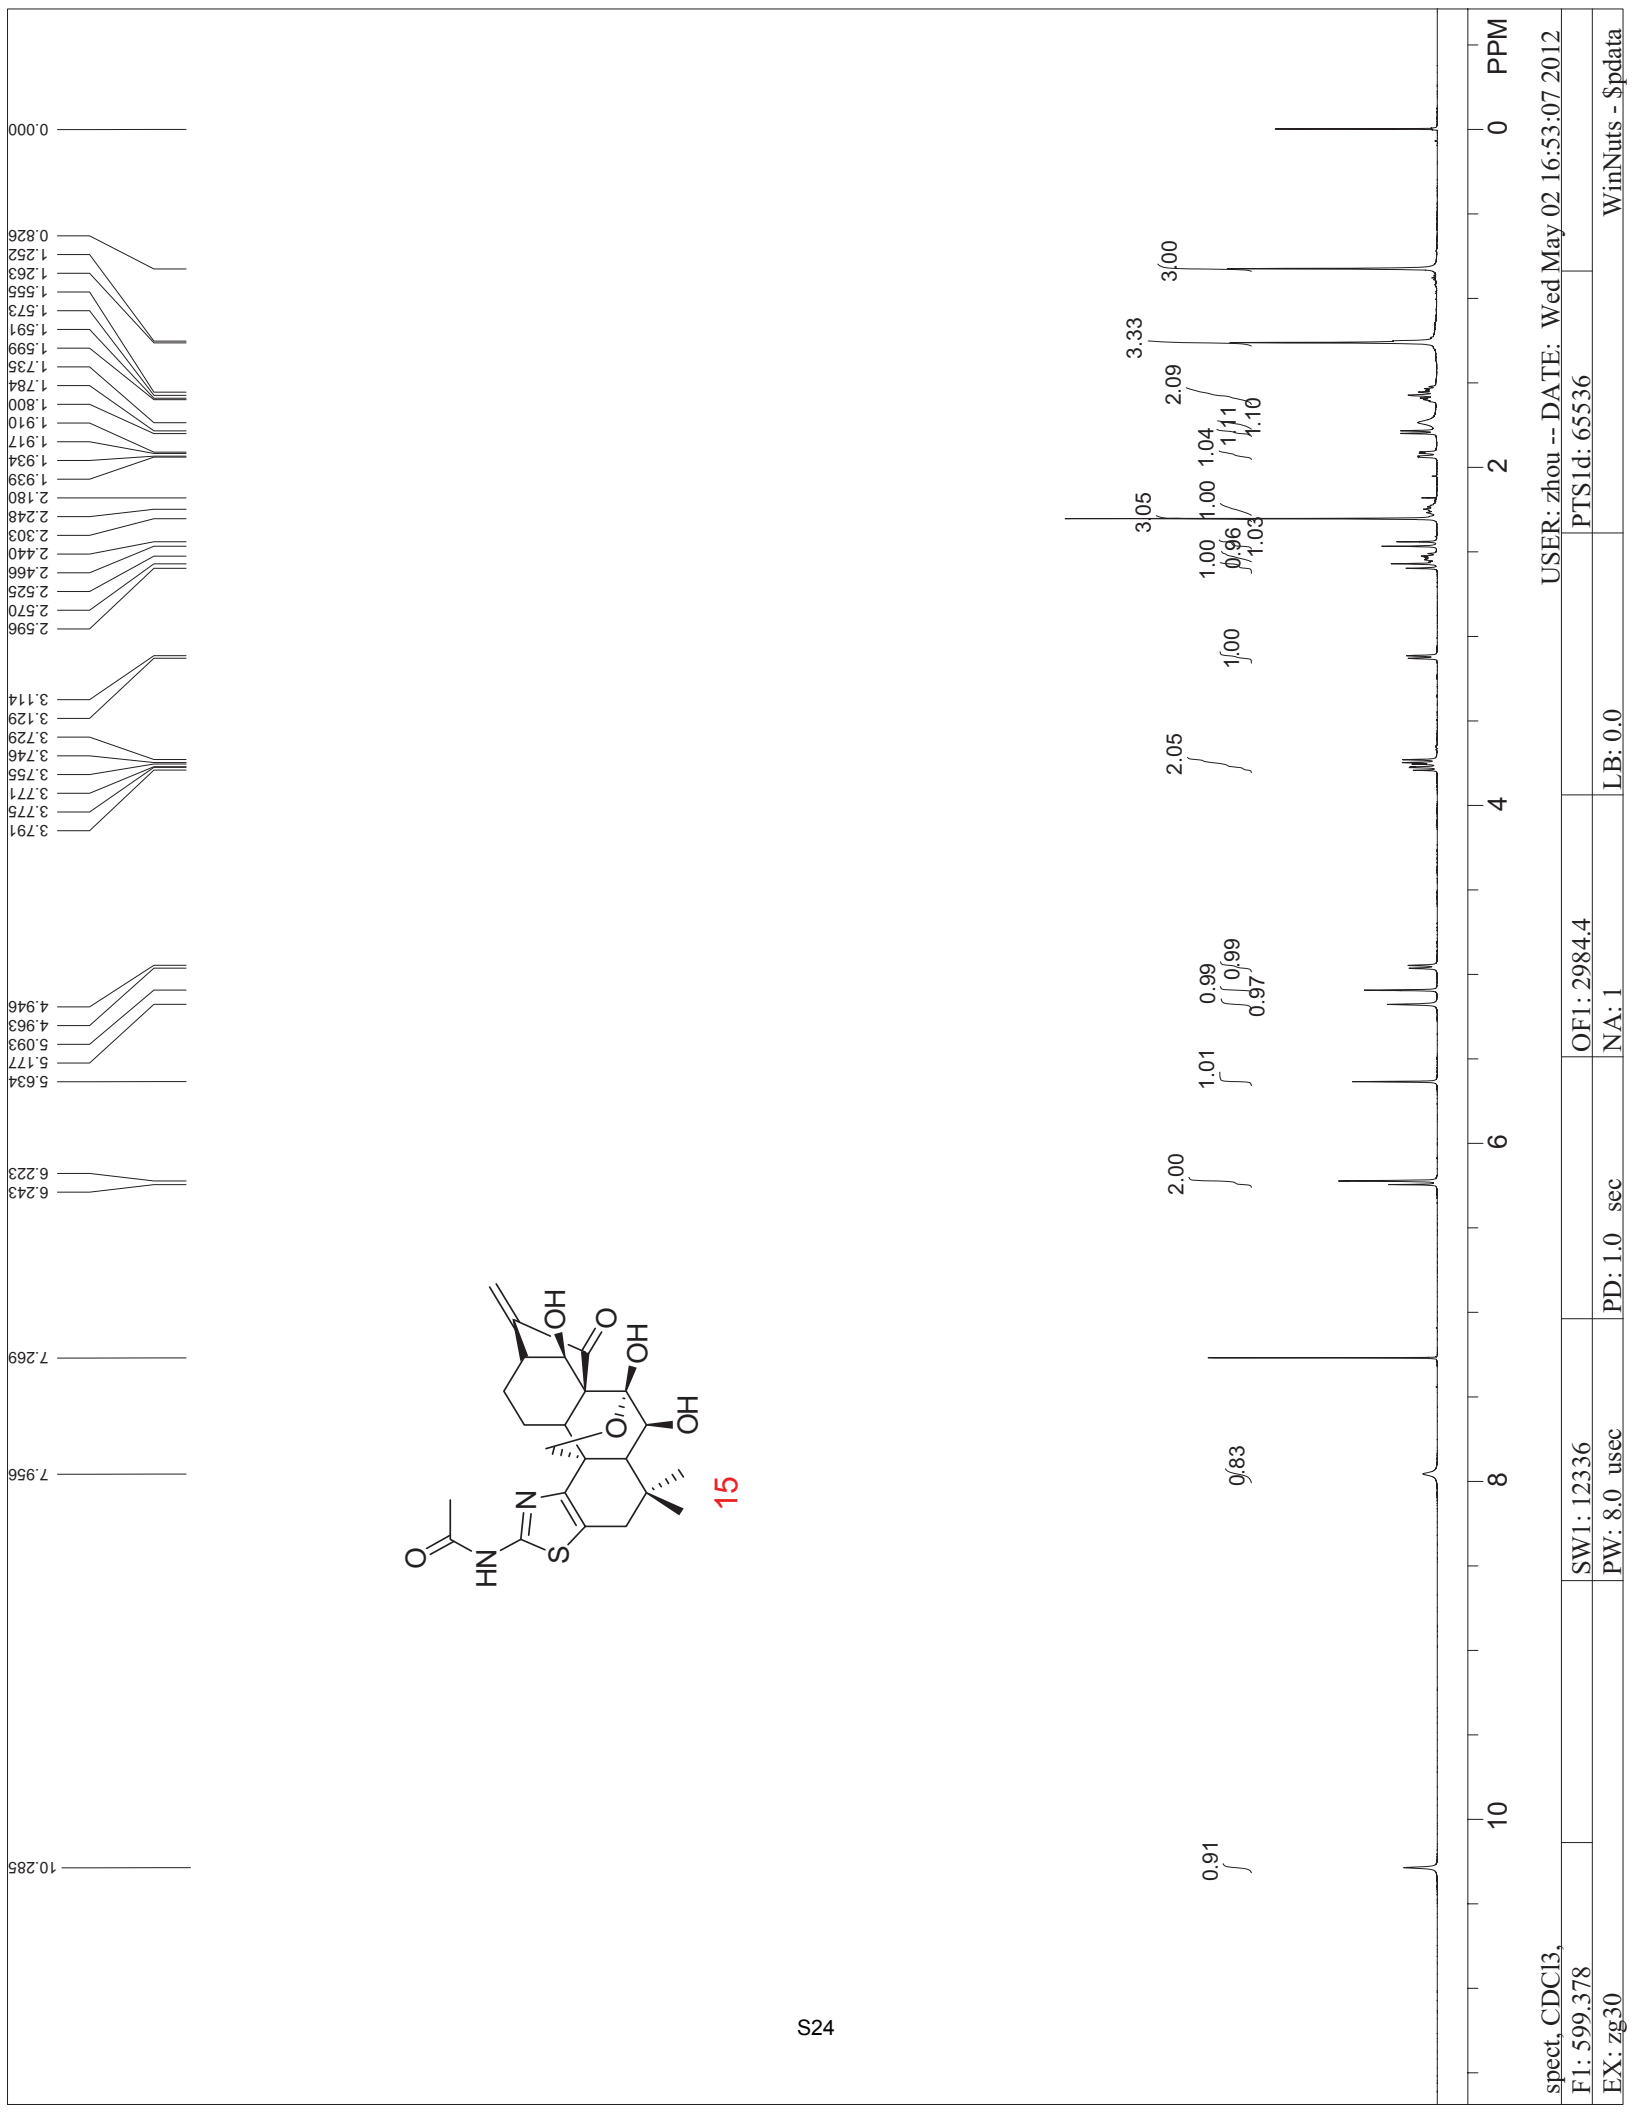

spectr\_CDCI3, USER: zhou -- DATE: Wed May 02 16:53:07 2012  
 F1: 599.378 SW1: 12336 OF1: 2984.4 PTS1d: 65536  
 EX: zg30 PW: 8.0 usec PD: 1.0 sec NA: 1 LB: 0.0 WinNuts - \$pdata



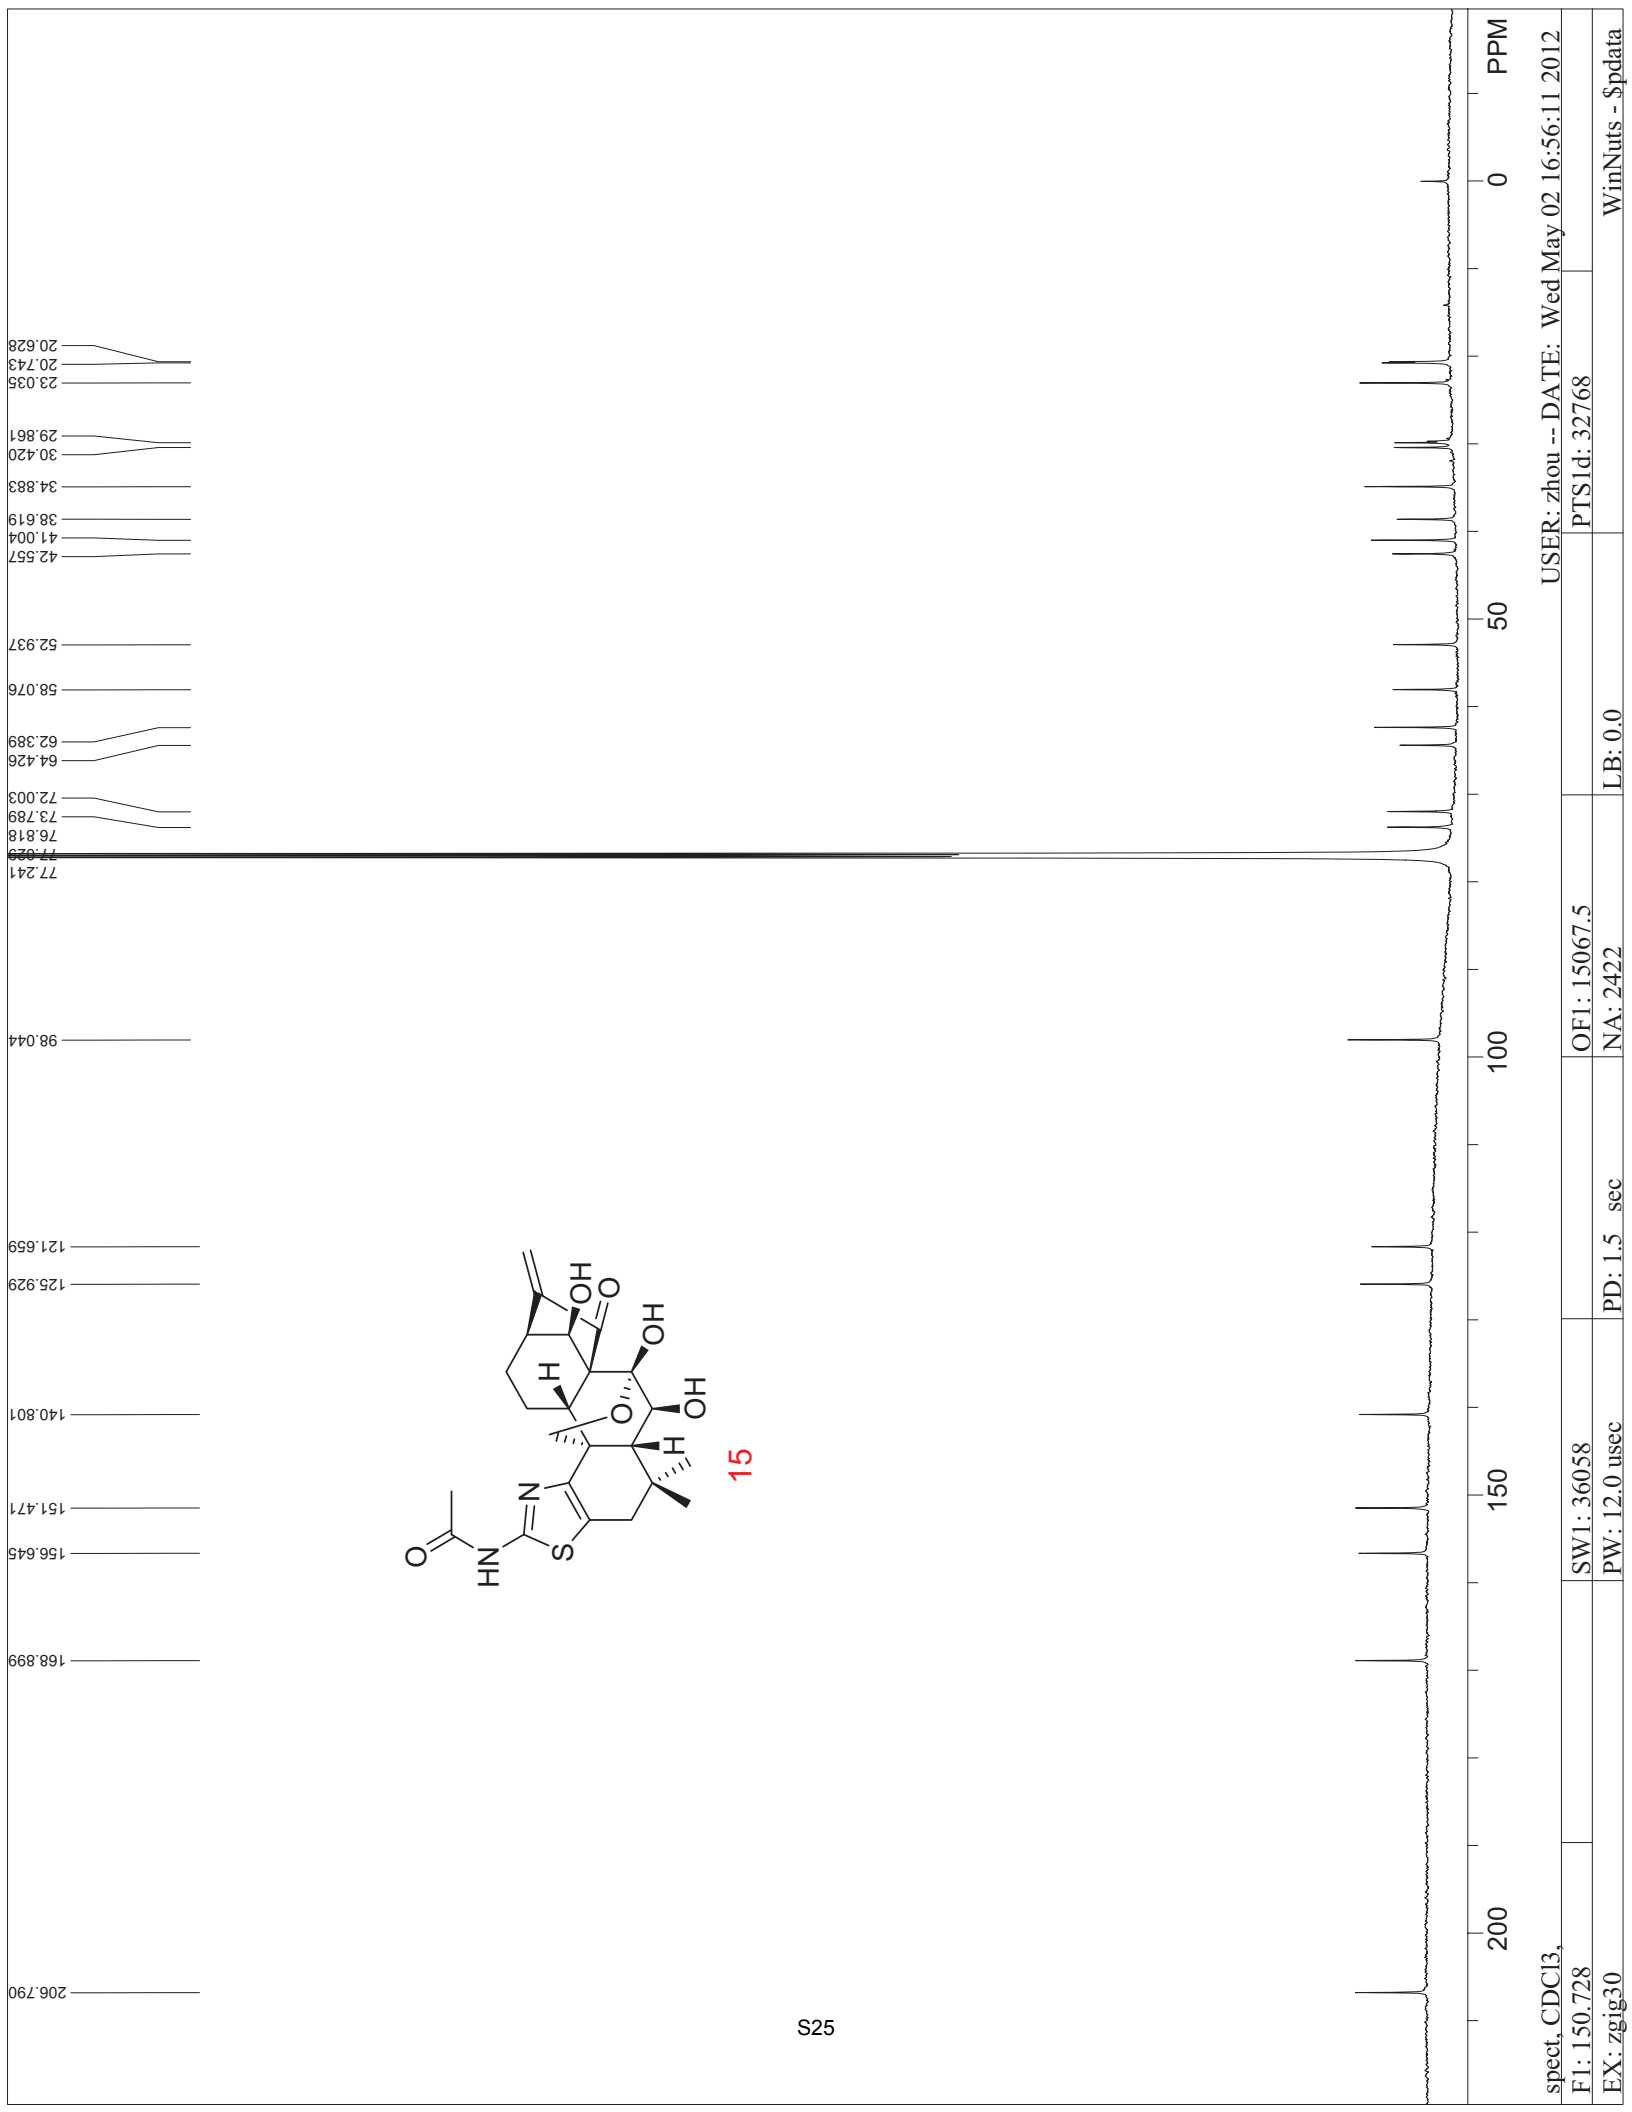

spect, CDCI3, USER: zhou -- DATE: Wed May 02 16:56:11 2012  
 F1: 150.728 OF1: 15067.5 PTS1d: 32768  
 EX: zgig30 PW: 12.0 usec PD: 1.5 sec NA: 2422 LB: 0.0  
 WinNuts - \$pdata

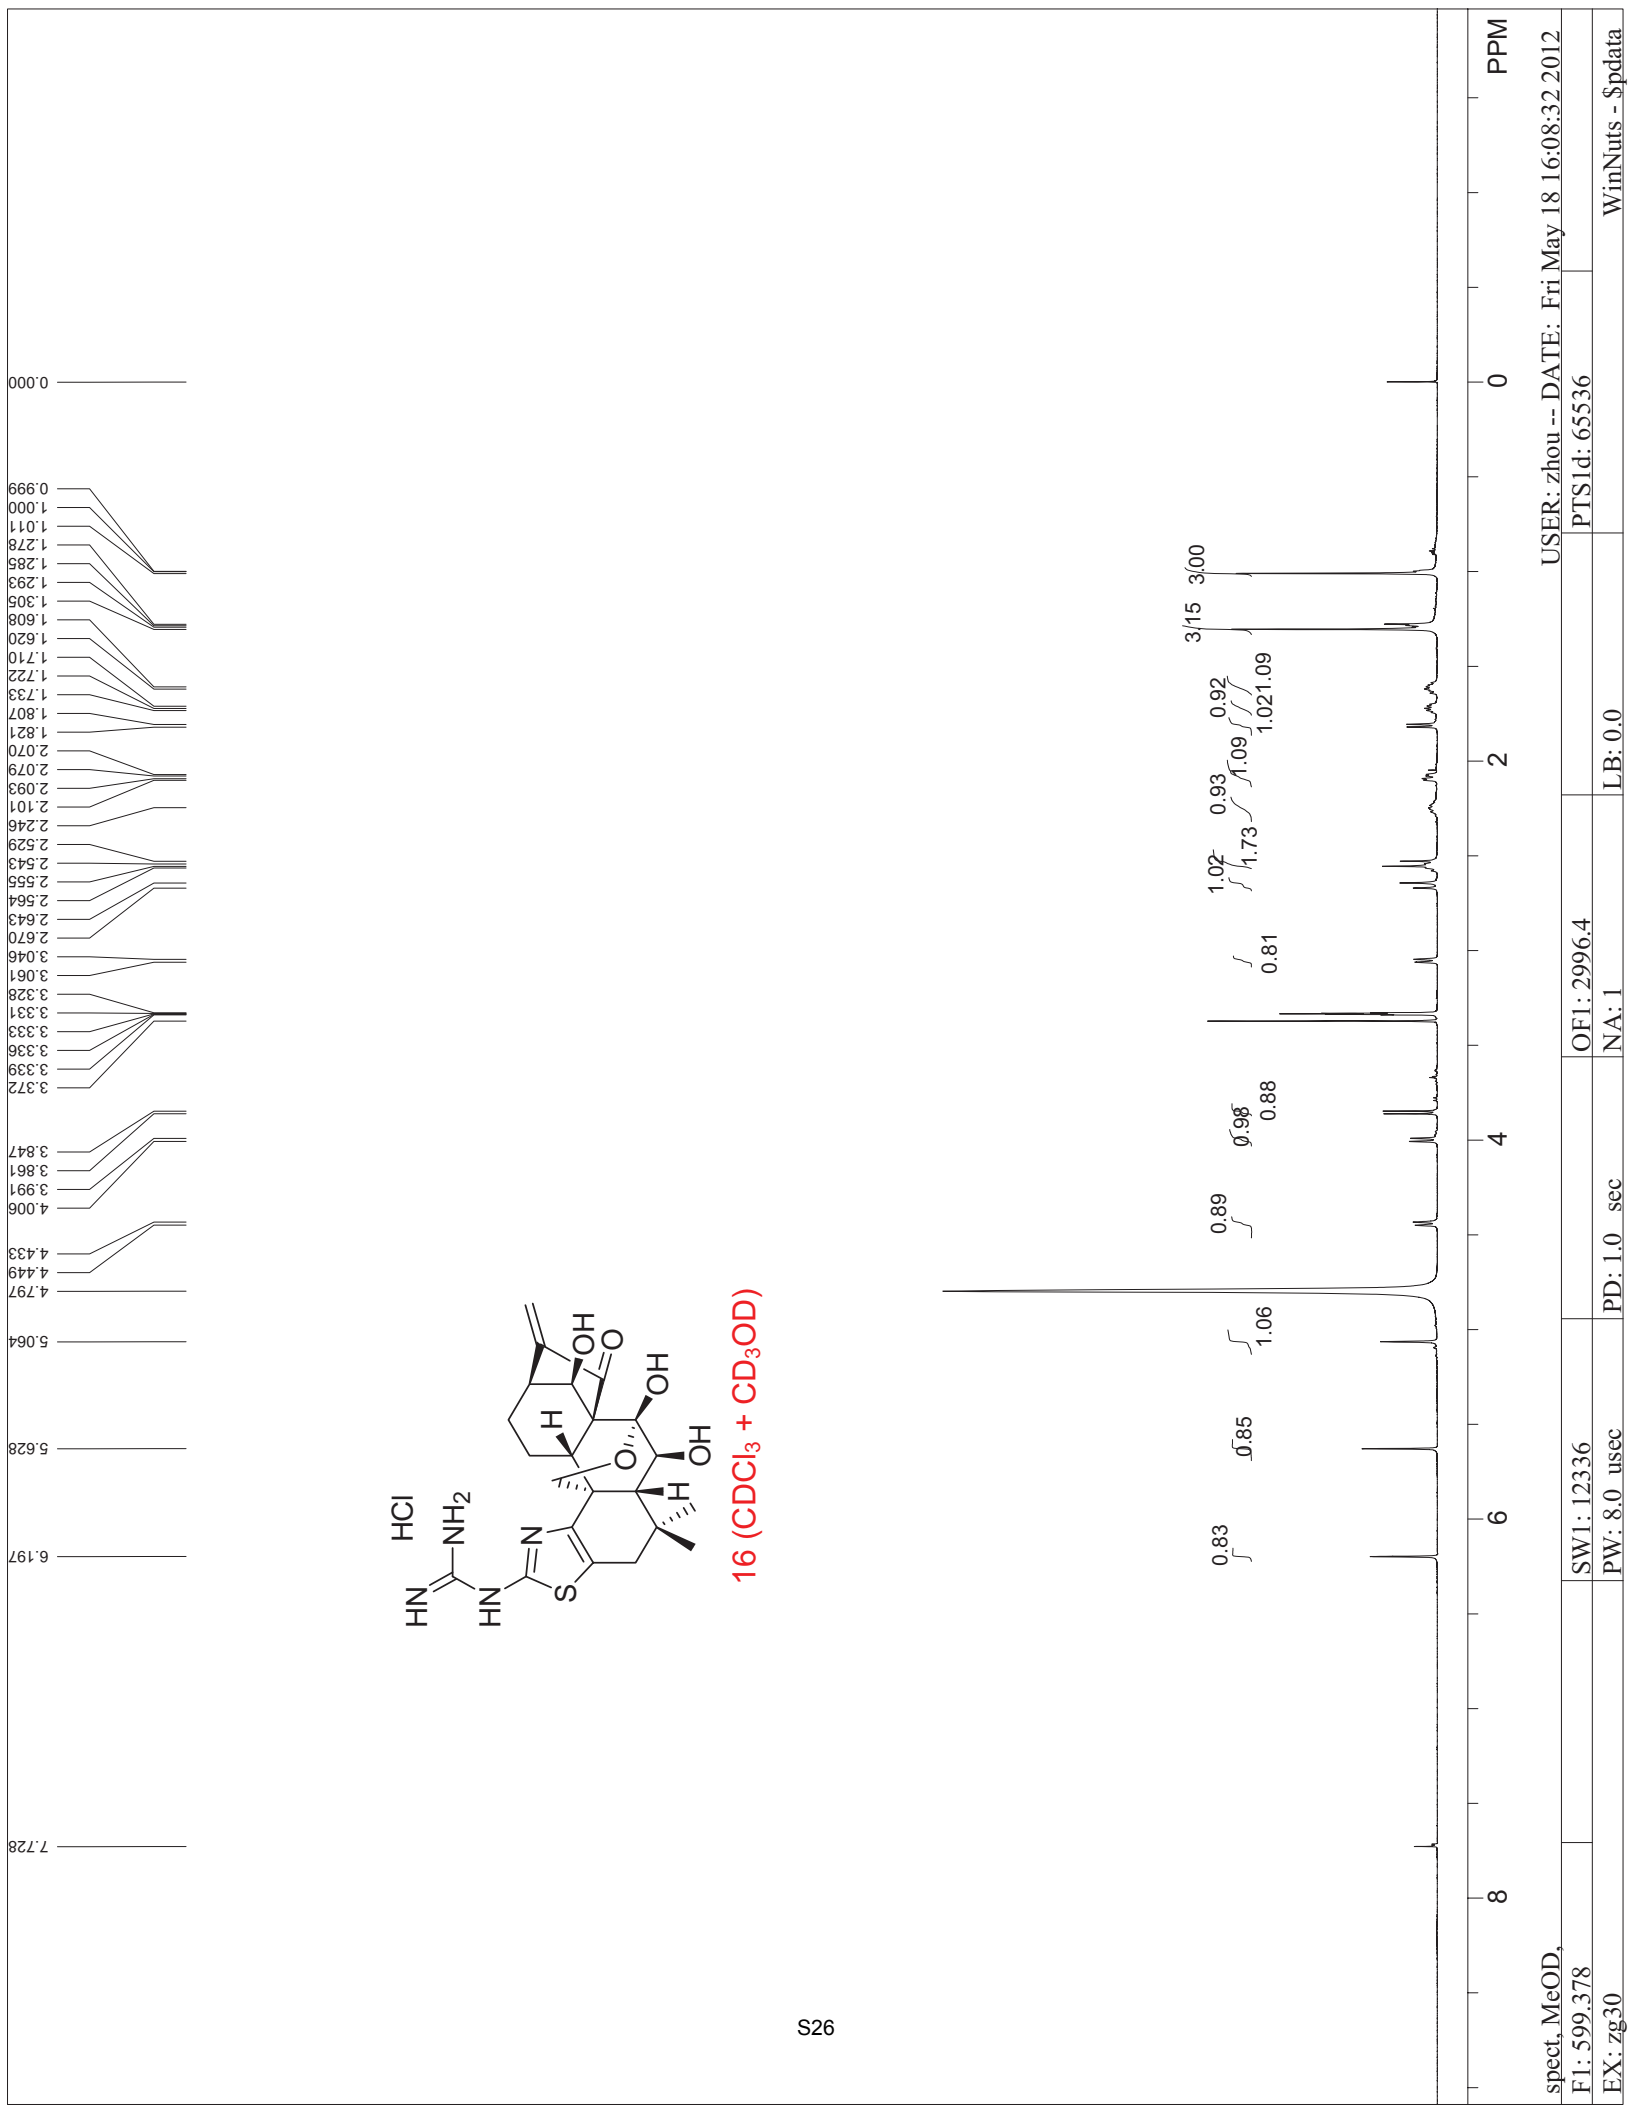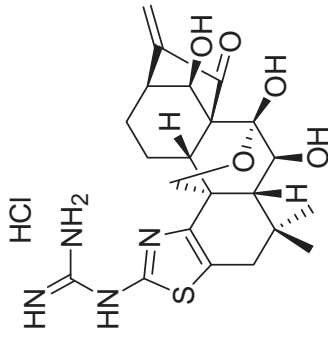

16 (CDCl<sub>3</sub> + CD<sub>3</sub>OD)

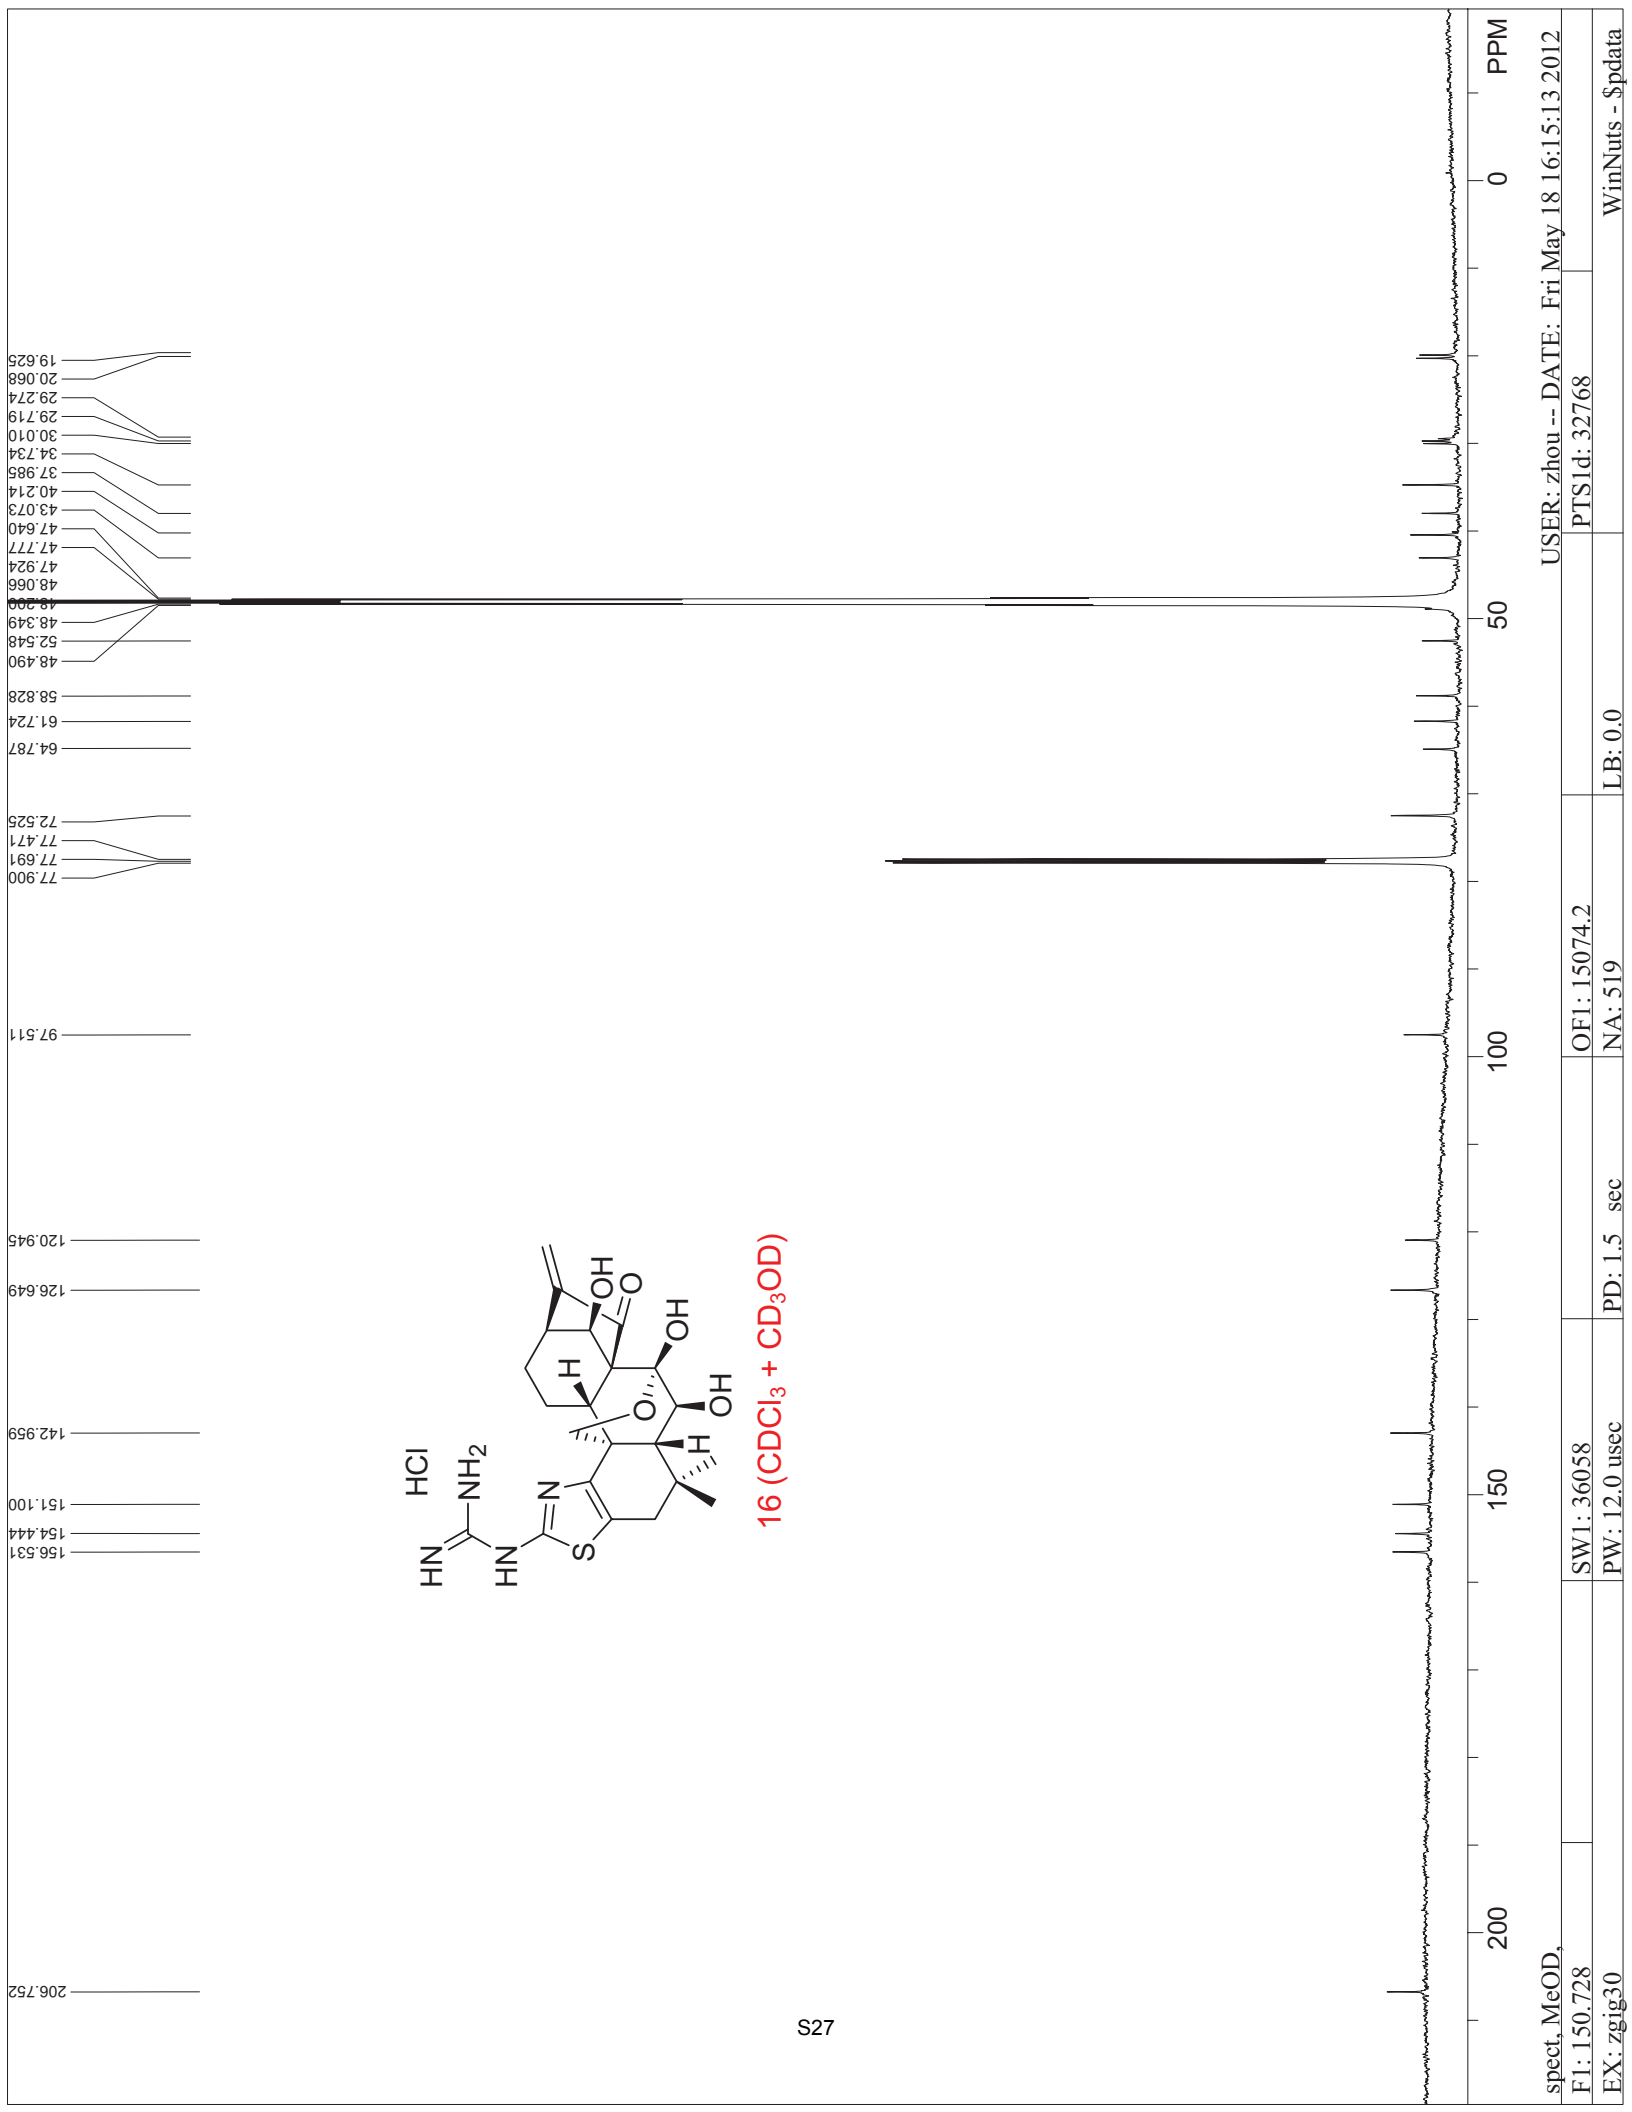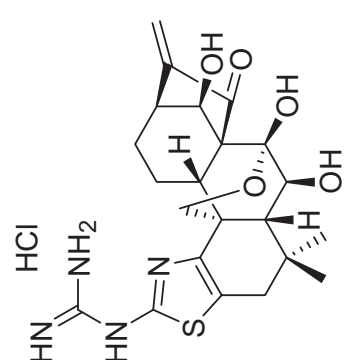

16 (CDCl<sub>3</sub> + CD<sub>3</sub>OD)
